# Supplementary material for: Theoretical investigation of the Diels–Alder reactions of unsaturated boronates
Source: Royal Society of Chemistry journal article supplement (doi:10.1039/c3ob40146d), 2013-01-01
Supplement: c3ob40146d.pdf [file c3ob40146d.pdf]

## Theoretical investigation of the Diels-Alder reactions of unsaturated boronates

Nicolás Grimblat and Silvina C. Pellegrinet\*

Instituto de Química Rosario (CONICET), Facultad de Ciencias Bioquímicas y Farmacéuticas, Universidad Nacional de Rosario, Suipacha 531. Rosario (2000), Argentina

### Supporting Information

List of contents:

- Computational methods. Page S2.
- MO shapes, energies and coefficients of dienophiles **3** and **6** (Figure S1) and B3LYP/6-31G\* optimized geometries for the transition structures of the Diels-Alder reaction with cyclopentadiene (**9**) with selected distances in Å and Wiberg bond indexes in parentheses (Figure S2). Pages S3 and S4.
- Cartesian coordinates, absolute energies including ZPE (in hartrees), free energies and free energies in solution of all the structures optimized in the gas phase reported in the paper. Pages S5-S25.
- Cartesian coordinates, absolute energies including ZPE (in hartrees) and free energies of all the structures optimized in toluene reported in the paper. Pages S26-S33.

## Computational methods

Conformational searches for the reactants, the transition structures (TSs) and the products were run to locate the global minima at the B3LYP/6-31G\* level of theory. Initially, a large number of geometries were generated using the conformational search module of Hyperchem with the MM+ method.<sup>1</sup> Selected structures were then successively reoptimized at the RHF/AM1, RHF/3-21G and B3LYP/6-31G\* levels of theory.<sup>2</sup> Geometries for all structures were fully optimized and normal mode analysis was used to confirm the nature of the stationary points and to evaluate the thermochemical properties. Reported thermochemical properties include zero-point energies (ZPEs) without scaling and were calculated at 1 atm and 298.15 K. The molecular orbitals of the reactants were calculated to analyse the frontier orbital interactions. Intrinsic reaction coordinate (IRCs) calculations were run to verify the connectivity between reactants, TSs and products. To examine the more important interactions in the TSs (C1-C6, C2-C3 and C6-B) we performed natural bond orbital calculations and Wiberg bond indexes (WBIs) were analysed. Free energies in solution were computed on the structures optimized in the gas phase at the B3LYP/6-31G\* level of theory with the polarisable continuum model (PCM) using toluene and dichloromethane as solvents ( $\epsilon_{\text{DCM}} = 8.93$ ,  $\epsilon_{\text{Toluene}} = 2.38$ ).<sup>3</sup> All the calculations were run with Gaussian 03.<sup>4</sup>

---

1 Hyperchem Professional Release 7.52, Hypercube, Inc., 2005.

2 In the case of vinylboronate **5**, we observed that the optimizations with the semiempirical method AM1 generated flat geometries for the borolane ring. Therefore, for these systems optimizations at this level of theory were avoided.

3 (a) Miertš, S.; Scrocco, E.; Tomasi, *J. Chem. Phys.* 1981, **55**, 117-129. (b) B. Mennucci and J. Tomasi, *J. Chem. Phys.* 1997, **106**, 5151-5158. (c) J. Tomasi, B. Mennucci and R. Cammi, *Chem. Rev.* 2005, **105**, 2999-3094.

4 Frisch, M. J.; Trucks, G. W.; Schlegel, H. B.; Scuseria, G. E.; Robb, M. A.; Cheeseman, J. R.; Montgomery, J. A., Jr.; Vreven, T.; Kudin, K. N.; Burant, J. C.; Millam, J. M.; Iyengar, S. S.; Tomasi, J.; Barone, V.; Mennucci, B.; Cossi, M.; Scalmani, G.; Rega, N.; Petersson, G. A.; Nakatsuji, H.; Hada, M.; Ehara, M.; Toyota, K.; Fukuda, R.; Hasegawa, J.; Ishida, M.; Nakajima, T.; Honda, Y.; Kitao, O.; Nakai, H.; Klene, M.; Li, X.; Knox, J. E.; Hratchian, H. P.; Cross, J. B.; Adamo, C.; Jaramillo, J.; Gomperts, R.; Stratmann, R. E.; Yazyev, O.; Austin, A. J.; Cammi, R.; Pomelli, C.; Ochterski, J. W.; Ayala, P. Y.; Morokuma, K.; Voth, G. A.; Salvador, P.; Dannenberg, J. J.; Zakrzewski, V. G.; Dapprich, S.; Daniels, A. D.; Strain, M. C.; Farkas, O.; Malick, D. K.; Rabuck, A. D.; Raghavachari, K.; Foresman, J. B.; Ortiz, J. V.; Cui, Q.; Baboul, A. G.; Clifford, S.; Cioslowski, J.; Stefanov, B. B.; Liu, G.; Liashenko, A.; Piskorz, P.; Komaromi, I.; Martin, R. L.; Fox, D. J.; Keith, T.; Al-Laham, M. A.; Peng, C. Y.; Nanayakkara, A.; Challacombe, M.; Gill, P. M. W.; Johnson, B.; Chen, W.; Wong, M. W.; Gonzalez, C.; Pople, J. A. Gaussian 03, Revision C.02, Gaussian, Inc., Wallingford CT, 2004.

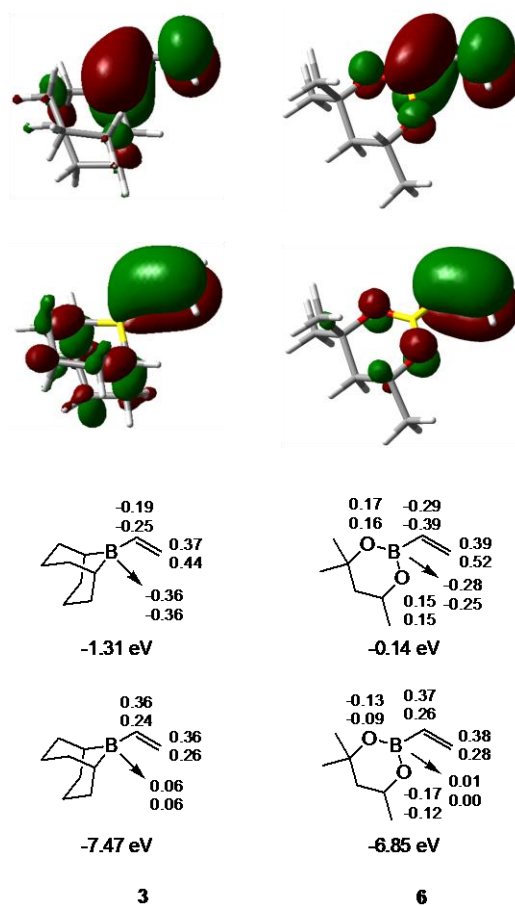

Figure S1. FMO shapes, energies and coefficients of dienophiles **3** and **6** (top: LUMOs, bottom: HOMOs).

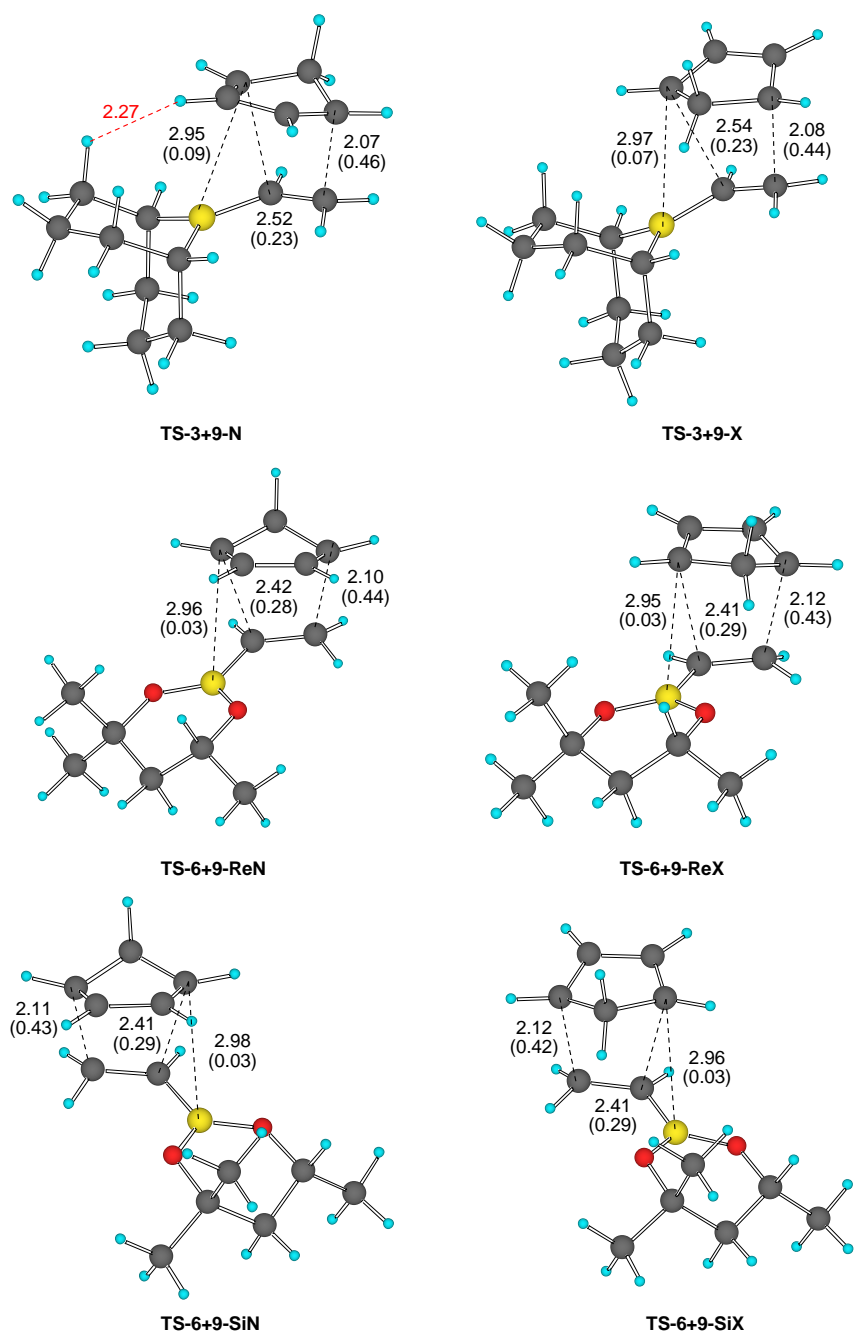

Figure S2. B3LYP/6-31G\* optimized geometries for the transition structures of the Diels-Alder reaction of dienophiles **3** and **6** with cyclopentadiene (**9**) with selected distances in Å and Wiberg bond indexes in parentheses.

## Calculations in the gas phase

### Dienophiles

#### Dichlorovinylborane (1)

B3LYP/6-31G\* Geometry

|    |   |           |           |           |
|----|---|-----------|-----------|-----------|
| C  | 0 | -0.945970 | -1.696989 | 0.000035  |
| C  | 0 | -0.964730 | -0.353439 | -0.000061 |
| B  | 0 | 0.299728  | 0.526306  | -0.000012 |
| Cl | 0 | 1.931975  | -0.160505 | 0.000181  |
| Cl | 0 | 0.143711  | 2.288487  | -0.000151 |
| H  | 0 | -1.859171 | -2.288487 | -0.000004 |
| H  | 0 | -0.012255 | -2.254198 | 0.000155  |
| H  | 0 | -1.931975 | 0.149199  | -0.000181 |

B3LYP/6-31G\* Energy + ZPE = -1023.283218

B3LYP/6-31G\* Free energy = -1023.313692

B3LYP/6-31G\* Free energy in DCM = -1023.330142

B3LYP/6-31G\* Free energy in Tol = -1023.328706

Number of imaginary frequencies = 0

#### Dimethylvinylborane (2)

B3LYP/6-31G\* Geometry

|   |   |           |           |           |
|---|---|-----------|-----------|-----------|
| C | 0 | -0.766204 | -1.962554 | -0.103560 |
| C | 0 | -1.026683 | -0.644830 | -0.122725 |
| B | 0 | 0.059994  | 0.478804  | -0.076319 |
| C | 0 | 1.607808  | 0.167763  | -0.014308 |
| C | 0 | -0.425127 | 1.984914  | -0.072027 |
| H | 0 | -1.548491 | -2.719987 | -0.141047 |
| H | 0 | 0.251532  | -2.344200 | -0.050007 |
| H | 0 | -2.080528 | -0.356609 | -0.178834 |
| H | 0 | 2.080528  | 0.541932  | -0.935929 |
| H | 0 | 2.080370  | 0.738562  | 0.798151  |
| H | 0 | 1.892560  | -0.883476 | 0.099151  |
| H | 0 | -0.808995 | 2.216864  | 0.935929  |
| H | 0 | 0.358118  | 2.719987  | -0.289511 |
| H | 0 | -1.270355 | 2.159781  | -0.751344 |

B3LYP/6-31G\* Energy + ZPE = -182.569104

B3LYP/6-31G\* Free energy = -182.600715

B3LYP/6-31G\* Free energy in DCM = -182.680994

B3LYP/6-31G\* Free energy in Tol = -182.680319

Number of imaginary frequencies = 0

#### Vinyl-9-BBN (3)

B3LYP/6-31G\* Geometry

|   |   |           |           |           |
|---|---|-----------|-----------|-----------|
| C | 0 | -1.001434 | -2.358410 | 0.000090  |
| C | 0 | 0.077483  | -1.556813 | 0.000028  |
| B | 0 | 0.011668  | -0.001384 | 0.000020  |
| C | 0 | 1.295299  | 0.918483  | -0.000048 |
| C | 0 | 1.274479  | 1.761597  | 1.310284  |
| C | 0 | -0.036655 | 2.531531  | 1.575715  |
| C | 0 | -1.315818 | 1.709644  | 1.310991  |

|   |   |           |           |           |
|---|---|-----------|-----------|-----------|
| C | 0 | -1.308991 | 0.866793  | 0.000077  |
| C | 0 | 1.274353  | 1.761584  | -1.310386 |
| C | 0 | -0.036810 | 2.531506  | -1.575710 |
| C | 0 | -1.315945 | 1.709618  | -1.310852 |
| H | 0 | -2.011952 | -1.953961 | 0.000139  |
| H | 0 | -0.930841 | -3.445726 | 0.000094  |
| H | 0 | 1.055448  | -2.047163 | -0.000020 |
| H | 0 | 2.232148  | 0.342249  | -0.000090 |
| H | 0 | 2.118928  | 2.467043  | 1.316487  |
| H | 0 | 1.453612  | 1.075253  | 2.151391  |
| H | 0 | -0.043570 | 2.870868  | 2.620546  |
| H | 0 | -0.055174 | 3.445726  | 0.975208  |
| H | 0 | -2.187365 | 2.381234  | 1.319210  |
| H | 0 | -1.465696 | 1.015218  | 2.151030  |
| H | 0 | -2.232148 | 0.270083  | 0.000129  |
| H | 0 | 1.453414  | 1.075231  | -2.151502 |
| H | 0 | 2.118797  | 2.467035  | -1.316675 |
| H | 0 | -0.055280 | 3.445711  | -0.975217 |
| H | 0 | -0.043823 | 2.870824  | -2.620546 |
| H | 0 | -1.465898 | 1.015175  | -2.150864 |
| H | 0 | -2.187495 | 2.381204  | -1.319003 |

B3LYP/6-31G\* Energy + ZPE = -415.886370

B3LYP/6-31G\* Free energy = -415.923045

B3LYP/6-31G\* Free energy in DCM = -416.135276

B3LYP/6-31G\* Free energy in Tol = -416.134863

Number of imaginary frequencies = 0

#### Methanol vinylboronate (4)

B3LYP/6-31G\* Geometry

|   |   |           |           |           |
|---|---|-----------|-----------|-----------|
| C | 0 | -1.803715 | -2.410623 | 0.083735  |
| C | 0 | -1.791334 | -1.071166 | 0.043828  |
| B | 0 | -0.465325 | -0.237653 | 0.036286  |
| O | 0 | 0.720575  | -0.915344 | 0.072208  |
| O | 0 | -0.413676 | 1.132855  | -0.004138 |
| C | 0 | -1.573694 | 1.948173  | -0.043837 |
| C | 0 | 1.961975  | -0.222454 | 0.067788  |
| H | 0 | -2.725384 | -2.990822 | 0.088995  |
| H | 0 | -0.877154 | -2.979653 | 0.112917  |
| H | 0 | -2.756487 | -0.561844 | 0.015924  |
| H | 0 | -1.244432 | 2.990822  | -0.071002 |
| H | 0 | -2.177470 | 1.748724  | -0.937758 |
| H | 0 | -2.200661 | 1.802492  | 0.844484  |
| H | 0 | 2.076076  | 0.384682  | -0.837576 |
| H | 0 | 2.052611  | 0.438040  | 0.937758  |
| H | 0 | 2.756487  | -0.973157 | 0.100852  |

B3LYP/6-31G\* Energy + ZPE = -333.075379

B3LYP/6-31G\* Free energy = -333.110447

B3LYP/6-31G\* Free energy in DCM = -333.200457

B3LYP/6-31G\* Free energy in Tol = -333.199068

Number of imaginary frequencies = 0

#### Pinacol vinylboronate (5)

B3LYP/6-31G\* Geometry

|   |   |           |          |          |
|---|---|-----------|----------|----------|
| C | 0 | -2.758796 | 2.160393 | 0.060400 |
|---|---|-----------|----------|----------|

|   |   |           |           |           |
|---|---|-----------|-----------|-----------|
| C | 0 | -1.422339 | 2.219035  | -0.016395 |
| B | 0 | -0.525834 | 0.951883  | -0.013646 |
| O | 0 | 0.848038  | 0.999743  | -0.031609 |
| O | 0 | -1.018235 | -0.333316 | 0.008159  |
| C | 0 | 0.104306  | -1.228625 | 0.240382  |
| C | 0 | 1.333149  | -0.357294 | -0.234402 |
| C | 0 | -0.129983 | -2.512635 | -0.553524 |
| C | 0 | 0.118615  | -1.535495 | 1.744289  |
| C | 0 | 1.635637  | -0.493699 | -1.732879 |
| C | 0 | 2.614216  | -0.538850 | 0.577795  |
| H | 0 | -3.388850 | 3.048499  | 0.055367  |
| H | 0 | -3.277515 | 1.206423  | 0.131488  |
| H | 0 | -0.945785 | 3.197894  | -0.084644 |
| H | 0 | -0.285911 | -2.308674 | -1.615149 |
| H | 0 | 0.719172  | -3.197894 | -0.449214 |
| H | 0 | -1.022545 | -3.020311 | -0.173760 |
| H | 0 | -0.851383 | -1.954758 | 2.029026  |
| H | 0 | 0.896790  | -2.261350 | 2.003092  |
| H | 0 | 0.279493  | -0.628054 | 2.334895  |
| H | 0 | 2.350780  | 0.282698  | -2.021843 |
| H | 0 | 2.071354  | -1.469643 | -1.972114 |
| H | 0 | 0.731396  | -0.359747 | -2.334895 |
| H | 0 | 3.388850  | 0.133503  | 0.195114  |
| H | 0 | 2.459994  | -0.306550 | 1.633930  |
| H | 0 | 2.987148  | -1.566400 | 0.496062  |

B3LYP/6-31G\* Energy + ZPE = -489.054300  
B3LYP/6-31G\* Free energy = -489.091254  
B3LYP/6-31G\* Free energy in DCM = -489.271474  
B3LYP/6-31G\* Free energy in Tol = -489.269220  
Number of imaginary frequencies = 0

**2-Methyl-2,4-pentanediol vinylboronate (6)**  
B3LYP/6-31G\* Geometry

|   |   |           |           |           |
|---|---|-----------|-----------|-----------|
| C | 0 | -0.235014 | -2.830211 | 0.116901  |
| C | 0 | -1.069203 | -1.782647 | 0.089603  |
| B | 0 | -0.588433 | -0.297195 | 0.100918  |
| O | 0 | 0.756754  | -0.030778 | 0.149108  |
| O | 0 | -1.541924 | 0.687018  | 0.067856  |
| C | 0 | 1.241506  | 1.318554  | 0.157909  |
| C | 0 | 0.187948  | 2.257196  | 0.750488  |
| C | 0 | -1.194271 | 2.088729  | 0.090420  |
| C | 0 | -2.277985 | 2.782525  | 0.920131  |
| C | 0 | -1.219550 | 2.600780  | -1.356735 |
| C | 0 | 2.556024  | 1.338600  | 0.928805  |
| H | 0 | 0.843589  | -2.689457 | 0.148626  |
| H | 0 | -0.583526 | -3.861995 | 0.109181  |
| H | 0 | -2.143163 | -1.974413 | 0.057708  |
| H | 0 | 1.441779  | 1.601334  | -0.885473 |
| H | 0 | 0.522072  | 3.297905  | 0.658299  |
| H | 0 | 0.093892  | 2.040555  | 1.823475  |
| H | 0 | -2.097408 | 3.861995  | 0.975632  |
| H | 0 | -3.261934 | 2.617105  | 0.469276  |
| H | 0 | -2.296765 | 2.379632  | 1.938094  |
| H | 0 | -1.032857 | 3.680303  | -1.392615 |
| H | 0 | -0.466580 | 2.100909  | -1.974792 |
| H | 0 | -2.200485 | 2.404348  | -1.800966 |
| H | 0 | 3.006752  | 2.337238  | 0.902572  |

|   |   |          |          |          |
|---|---|----------|----------|----------|
| H | 0 | 2.391496 | 1.056821 | 1.974792 |
| H | 0 | 3.261934 | 0.626640 | 0.489749 |

B3LYP/6-31G\* Energy + ZPE = -489.057657  
B3LYP/6-31G\* Free energy = -489.095078  
B3LYP/6-31G\* Free energy in DCM = -489.275637  
B3LYP/6-31G\* Free energy in Tol = -489.273623  
Number of imaginary frequencies = 0

**(-)-Dimethyl tartrate vinylboronate (7)**  
B3LYP/6-31G\* Geometry

|   |   |           |           |           |
|---|---|-----------|-----------|-----------|
| C | 0 | 1.657181  | 2.702209  | -0.369293 |
| C | 0 | 0.470932  | 2.078751  | -0.369278 |
| B | 0 | 0.340179  | 0.537231  | -0.369278 |
| O | 0 | -0.871231 | -0.119324 | -0.409317 |
| O | 0 | 1.415604  | -0.325806 | -0.331436 |
| C | 0 | 0.918579  | -1.659500 | -0.442123 |
| C | 0 | -0.619141 | -1.523376 | -0.314667 |
| C | 0 | 1.330170  | -2.325012 | -1.757004 |
| C | 0 | -1.145813 | -2.102539 | 1.001740  |
| O | 0 | 0.643829  | -3.145172 | -2.330017 |
| O | 0 | 2.545547  | -1.934967 | -2.159088 |
| O | 0 | -0.563828 | -2.949020 | 1.646957  |
| O | 0 | -2.342285 | -1.593445 | 1.318924  |
| C | 0 | 3.023926  | -2.557358 | -3.366196 |
| C | 0 | -2.932953 | -2.109985 | 2.526108  |
| H | 0 | 1.749588  | 3.786942  | -0.368362 |
| H | 0 | 2.590088  | 2.142273  | -0.369751 |
| H | 0 | -0.438477 | 2.679993  | -0.369781 |
| H | 0 | 1.319931  | -2.270721 | 0.373734  |
| H | 0 | -1.128174 | -2.044556 | -1.132492 |
| H | 0 | 2.352295  | -2.337891 | -4.199951 |
| H | 0 | 3.090790  | -3.640579 | -3.236450 |
| H | 0 | 4.009811  | -2.127594 | -3.541946 |
| H | 0 | -2.288940 | -1.901962 | 3.384277  |
| H | 0 | -3.084137 | -3.189500 | 2.445419  |
| H | 0 | -3.886749 | -1.592392 | 2.625732  |

B3LYP/6-31G\* Energy + ZPE = -787.551827  
B3LYP/6-31G\* Free energy = -787.599387  
B3LYP/6-31G\* Free energy in DCM = -787.746983  
B3LYP/6-31G\* Free energy in Tol = -787.741738  
Number of imaginary frequencies = 0

**Methanol alkynylboronate (8)**  
B3LYP/6-31G\* Geometry

|   |   |           |           |           |
|---|---|-----------|-----------|-----------|
| C | 0 | -0.402175 | -0.925731 | 0.622965  |
| B | 0 | -0.408937 | 0.602691  | 0.428218  |
| O | 0 | 0.704153  | 1.312993  | 0.087706  |
| O | 0 | -1.586530 | 1.258382  | 0.607790  |
| C | 0 | -1.661870 | 2.671866  | 0.443137  |
| C | 0 | 1.987241  | 0.739612  | -0.126241 |
| C | 0 | -0.374824 | -2.129206 | 0.771372  |
| H | 0 | -1.382988 | 2.967253  | -0.574355 |
| H | 0 | -2.696858 | 2.965295  | 0.635651  |
| H | 0 | -1.000169 | 3.188118  | 1.147392  |

|   |   |           |           |           |
|---|---|-----------|-----------|-----------|
| H | 0 | 2.696858  | 1.190508  | 0.575620  |
| H | 0 | 1.976604  | -0.345494 | 0.016030  |
| H | 0 | 2.310353  | 0.968371  | -1.147392 |
| H | 0 | -0.370414 | -3.188118 | 0.906356  |

B3LYP/6-31G\* Energy + ZPE = -331.854222  
B3LYP/6-31G\* Free energy = -331.888262  
B3LYP/6-31G\* Free energy in DCM = -331.958281  
B3LYP/6-31G\* Free energy in Tol = -331.955467  
Number of imaginary frequencies = 0

## Dienes

### Cyclopentadiene (9)

B3LYP/6-31G\* Geometry

|   |   |           |           |           |
|---|---|-----------|-----------|-----------|
| C | 0 | -0.875080 | -0.858199 | 0.000065  |
| C | 0 | -0.990265 | 0.607114  | 0.000067  |
| C | 0 | 0.243773  | 1.151557  | 0.000038  |
| C | 0 | 0.428870  | -1.203137 | 0.000035  |
| C | 0 | 1.269201  | 0.047542  | 0.000015  |
| H | 0 | -1.720357 | -1.539055 | 0.000085  |
| H | 0 | -1.931543 | 1.147533  | 0.000088  |
| H | 0 | 0.490909  | 2.207116  | 0.000032  |
| H | 0 | 0.837901  | -2.207116 | 0.000027  |
| H | 0 | 1.931503  | 0.099605  | -0.878154 |
| H | 0 | 1.931543  | 0.099606  | 0.878154  |

B3LYP/6-31G\* Energy + ZPE = -194.008161  
B3LYP/6-31G\* Free energy = -194.034758  
B3LYP/6-31G\* Free energy in DCM = -194.101477  
B3LYP/6-31G\* Free energy in Tol = -194.100015  
Number of imaginary frequencies = 0

### 1,3-Cyclohexadiene (10)

B3LYP/6-31G\* Geometry

|   |   |           |           |           |
|---|---|-----------|-----------|-----------|
| C | 0 | -1.222455 | -0.768632 | 0.261496  |
| C | 0 | -1.248185 | 0.768708  | 0.175562  |
| C | 0 | 0.140913  | 1.361515  | 0.250137  |
| C | 0 | 1.198862  | 0.675676  | -0.213340 |
| C | 0 | 1.034645  | -0.675742 | -0.760665 |
| C | 0 | -0.103774 | -1.361515 | -0.565316 |
| H | 0 | -1.081376 | -1.077208 | 1.311684  |
| H | 0 | -2.192908 | -1.176499 | -0.044881 |
| H | 0 | -1.889766 | 1.176623  | 0.965487  |
| H | 0 | -1.708405 | 1.077293  | -0.778896 |
| H | 0 | 0.255619  | 2.376431  | 0.624709  |
| H | 0 | 2.192908  | 1.117337  | -0.208665 |
| H | 0 | 1.861978  | -1.117459 | -1.311684 |
| H | 0 | -0.214226 | -2.376431 | -0.941165 |

B3LYP/6-31G\* Energy + ZPE = -233.296105  
B3LYP/6-31G\* Free energy = -233.324356  
B3LYP/6-31G\* Free energy in DCM = -233.418978  
B3LYP/6-31G\* Free energy in Tol = -233.417787  
Number of imaginary frequencies = 0

## Piperylene (11)

### *s-trans* conformation

B3LYP/6-31G\* Geometry

|   |   |           |           |           |
|---|---|-----------|-----------|-----------|
| C | 0 | 1.204657  | 0.876912  | 0.000081  |
| C | 0 | 1.219376  | 2.217893  | 0.000137  |
| C | 0 | -0.002296 | 0.062649  | 0.000083  |
| C | 0 | -0.008601 | -1.280516 | 0.000027  |
| C | 0 | -1.236814 | -2.139933 | 0.000028  |
| H | 0 | 2.151042  | 0.334538  | 0.000030  |
| H | 0 | 2.148487  | 2.779758  | 0.000132  |
| H | 0 | 0.298807  | 2.797696  | 0.000189  |
| H | 0 | -0.952468 | 0.599629  | 0.000134  |
| H | 0 | 0.948285  | -1.805756 | -0.000024 |
| H | 0 | -1.263313 | -2.797617 | -0.879964 |
| H | 0 | -1.263256 | -2.797696 | 0.879964  |
| H | 0 | -2.151042 | -1.536891 | 0.000085  |

B3LYP/6-31G\* Energy + ZPE = -195.198432  
B3LYP/6-31G\* Free energy = -195.227223  
B3LYP/6-31G\* Free energy in DCM = -195.308284  
B3LYP/6-31G\* Free energy in Tol = -195.307003  
Number of imaginary frequencies = 0

### *s-cis* conformation

B3LYP/6-31G\* Geometry

|   |   |           |           |           |
|---|---|-----------|-----------|-----------|
| C | 0 | 1.678136  | 0.294304  | -0.058761 |
| C | 0 | 1.691284  | 1.608576  | 0.201647  |
| C | 0 | 0.523213  | -0.605018 | 0.062071  |
| C | 0 | -0.763885 | -0.257852 | -0.090905 |
| C | 0 | -1.929545 | -1.188921 | 0.063495  |
| H | 0 | 2.608458  | -0.178666 | -0.376040 |
| H | 0 | 2.588159  | 2.204758  | 0.060625  |
| H | 0 | 0.811973  | 2.130121  | 0.571894  |
| H | 0 | 0.755022  | -1.650343 | 0.273757  |
| H | 0 | -1.001202 | 0.772544  | -0.358386 |
| H | 0 | -2.608458 | -0.846488 | 0.856999  |
| H | 0 | -2.527496 | -1.237332 | -0.856999 |
| H | 0 | -1.604728 | -2.204758 | 0.312841  |

B3LYP/6-31G\* Energy + ZPE = -195.192898  
B3LYP/6-31G\* Free energy = -195.221944  
B3LYP/6-31G\* Free energy in DCM = -195.302507  
B3LYP/6-31G\* Free energy in Tol = -195.301298  
Number of imaginary frequencies = 0

## Isoprene (12)

### *s-trans* conformation

B3LYP/6-31G\* Geometry

|   |   |           |           |           |
|---|---|-----------|-----------|-----------|
| C | 0 | -1.182075 | -1.822806 | -0.000116 |
| C | 0 | -1.189859 | -0.482597 | -0.000319 |
| C | 0 | -0.008643 | 0.389377  | -0.000338 |
| C | 0 | -0.164254 | 1.724386  | -0.000551 |
| C | 0 | 1.360748  | -0.245893 | -0.000111 |



|   |   |           |           |           |
|---|---|-----------|-----------|-----------|
| H | 0 | -2.107865 | -2.390491 | -0.000119 |
| H | 0 | -0.262249 | -2.400928 | 0.000059  |
| H | 0 | -2.149100 | 0.035282  | -0.000488 |
| H | 0 | 0.685846  | 2.400928  | -0.000571 |
| H | 0 | -1.150453 | 2.182218  | -0.000713 |
| H | 0 | 2.149100  | 0.512200  | -0.000152 |
| H | 0 | 1.501511  | -0.884259 | 0.881363  |
| H | 0 | 1.501679  | -0.884529 | -0.881363 |

B3LYP/6-31G\* Energy + ZPE = -195.196338  
B3LYP/6-31G\* Free energy = -195.224814  
B3LYP/6-31G\* Free energy in DCM = -195.305442  
B3LYP/6-31G\* Free energy in Tol = -195.304482  
Number of imaginary frequencies = 0

#### *s-cis* conformation

B3LYP/6-31G\* Geometry

|   |   |           |           |           |
|---|---|-----------|-----------|-----------|
| C | 0 | -1.212920 | -1.823065 | -0.004189 |
| C | 0 | -1.163660 | -0.552709 | 0.412964  |
| C | 0 | -0.007285 | 0.359471  | 0.283677  |
| C | 0 | 1.259735  | -0.069614 | 0.382226  |
| C | 0 | -0.341527 | 1.816355  | 0.056566  |
| H | 0 | -2.100152 | -2.432998 | 0.140965  |
| H | 0 | -0.373545 | -2.292303 | -0.511259 |
| H | 0 | -2.057109 | -0.118320 | 0.865545  |
| H | 0 | 2.100152  | 0.609377  | 0.264035  |
| H | 0 | 1.495973  | -1.108092 | 0.595961  |
| H | 0 | 0.560190  | 2.432998  | -0.002623 |
| H | 0 | -0.912744 | 1.953013  | -0.871081 |
| H | 0 | -0.967266 | 2.206283  | 0.871081  |

B3LYP/6-31G\* Energy + ZPE = -195.191876  
B3LYP/6-31G\* Free energy = -195.220743  
B3LYP/6-31G\* Free energy in DCM = -195.300142  
B3LYP/6-31G\* Free energy in Tol = -195.299201  
Number of imaginary frequencies = 0

#### Diels-Alder reaction of dichlorovinylborane (1) with cyclopentadiene (9)

##### Endo transition structure (TS-1+9-N)

B3LYP/6-31G\* Geometry

|   |   |           |           |           |
|---|---|-----------|-----------|-----------|
| C | 0 | 1.162758  | -0.353825 | -0.988472 |
| C | 0 | 1.162758  | 1.053056  | -0.988472 |
| C | 0 | -0.148609 | -0.804799 | -0.988472 |
| C | 0 | -0.164690 | 1.520256  | -0.905264 |
| C | 0 | -1.038002 | 0.355117  | -1.340549 |
| H | 0 | 2.044375  | -0.978730 | -0.904687 |
| H | 0 | 2.048547  | 1.675704  | -0.921052 |
| H | 0 | -0.463076 | -1.841710 | -1.003309 |
| H | 0 | -0.429743 | 2.548179  | -1.137329 |
| H | 0 | -2.048547 | 0.328495  | -0.931358 |
| H | 0 | -1.125281 | 0.395131  | -2.439941 |
| C | 0 | -0.568319 | 1.421379  | 1.083161  |
| C | 0 | -0.791439 | 0.069368  | 1.398555  |

|    |   |           |           |          |
|----|---|-----------|-----------|----------|
| B  | 0 | 0.221623  | -0.871642 | 1.997701 |
| Cl | 0 | -0.218639 | -2.548179 | 2.439941 |
| Cl | 0 | 1.895792  | -0.355621 | 2.370537 |
| H  | 0 | -1.429698 | 2.084127  | 1.016795 |
| H  | 0 | 0.321290  | 1.904706  | 1.475584 |
| H  | 0 | -1.803908 | -0.310206 | 1.271015 |

B3LYP/6-31G\* Energy + ZPE = -1217.268010  
B3LYP/6-31G\* Free energy = -1217.304244  
B3LYP/6-31G\* Free energy in DCM = -1217.415888  
B3LYP/6-31G\* Free energy in Tol = -1217.412347  
Number of imaginary frequencies = 1 (-398.81)

##### Exo transition structure (TS-1+9-X)

B3LYP/6-31G\* Geometry

|    |   |           |           |           |
|----|---|-----------|-----------|-----------|
| C  | 0 | 1.785309  | -0.342190 | -0.958059 |
| C  | 0 | 1.785309  | 1.065476  | -0.958059 |
| C  | 0 | 0.473531  | -0.794783 | -0.958059 |
| C  | 0 | 0.458624  | 1.528715  | -0.852289 |
| C  | 0 | -0.421126 | 0.366432  | -1.273124 |
| H  | 0 | 2.667502  | -0.969809 | -0.890787 |
| H  | 0 | 2.671507  | 1.689970  | -0.907805 |
| H  | 0 | 0.161466  | -1.832142 | -0.988128 |
| H  | 0 | 0.182284  | 2.559068  | -1.058523 |
| H  | 0 | -1.419169 | 0.331172  | -0.836652 |
| H  | 0 | -0.538636 | 0.419725  | -2.369199 |
| C  | 0 | 0.079764  | 1.401444  | 1.154569  |
| C  | 0 | 0.183015  | 0.048518  | 1.519101  |
| B  | 0 | -0.955667 | -0.914417 | 1.735525  |
| Cl | 0 | -0.657336 | -2.559068 | 2.369199  |
| Cl | 0 | -2.671507 | -0.478359 | 1.442630  |
| H  | 0 | -0.911352 | 1.848312  | 1.108902  |
| H  | 0 | 0.854030  | 2.092370  | 1.476995  |
| H  | 0 | 1.173706  | -0.309795 | 1.791974  |

B3LYP/6-31G\* Energy + ZPE = -1217.267566  
B3LYP/6-31G\* Free energy = -1217.303828  
B3LYP/6-31G\* Free energy in DCM = -1217.414637  
B3LYP/6-31G\* Free energy in Tol = -1217.411318  
Number of imaginary frequencies = 1 (-399.24)

##### Endo product (P-1+9-N)

B3LYP/6-31G\* Geometry

|    |   |           |           |           |
|----|---|-----------|-----------|-----------|
| C  | 0 | -1.228500 | 0.369872  | -0.938726 |
| C  | 0 | -0.083463 | 0.536486  | -1.616027 |
| C  | 0 | 0.904991  | 1.225411  | -0.686492 |
| C  | 0 | 1.307045  | 0.162356  | 0.395922  |
| C  | 0 | -0.005942 | -0.023190 | 1.223665  |
| C  | 0 | -1.022380 | 0.947597  | 0.453246  |
| C  | 0 | -0.061751 | 2.114174  | 0.128755  |
| B  | 0 | -0.596595 | -1.454890 | 1.435915  |
| Cl | 0 | -1.917476 | -1.682333 | 2.601575  |
| Cl | 0 | -0.048322 | -2.890932 | 0.562997  |
| H  | 0 | -2.111273 | -0.174452 | -1.259690 |
| H  | 0 | 0.158372  | 0.151096  | -2.601575 |
| H  | 0 | 1.755867  | 1.716856  | -1.164323 |



|   |   |           |           |           |
|---|---|-----------|-----------|-----------|
| H | 0 | 2.111273  | 0.546632  | 1.033458  |
| H | 0 | 1.661914  | -0.764271 | -0.061782 |
| H | 0 | 0.121777  | 0.411971  | 2.225018  |
| H | 0 | -1.921094 | 1.174763  | 1.029447  |
| H | 0 | 0.395438  | 2.565424  | 1.017677  |
| H | 0 | -0.538476 | 2.890932  | -0.477368 |

B3LYP/6-31G\* Energy + ZPE = -1217.310176  
B3LYP/6-31G\* Free energy = -1217.346200  
B3LYP/6-31G\* Free energy in DCM = -1217.459283  
B3LYP/6-31G\* Free energy in Tol = -1217.457541  
Number of imaginary frequencies = 0

#### **Exo product (P-1+9-X)**

B3LYP/6-31G\* Geometry

|    |   |           |           |           |
|----|---|-----------|-----------|-----------|
| C  | 0 | -2.120503 | 0.148224  | 0.233751  |
| C  | 0 | -1.973307 | 1.269305  | -0.487322 |
| C  | 0 | -0.586165 | 1.820930  | -0.199470 |
| C  | 0 | 0.442582  | 0.847200  | -0.876224 |
| C  | 0 | 0.258604  | -0.489413 | -0.087438 |
| C  | 0 | -0.836218 | -0.061189 | 1.018032  |
| C  | 0 | -0.424404 | 1.403791  | 1.280368  |
| B  | 0 | 1.505023  | -1.138089 | 0.597208  |
| Cl | 0 | 1.494892  | -2.873384 | 0.968508  |
| Cl | 0 | 2.938616  | -0.227958 | 1.105052  |
| H  | 0 | -2.938616 | -0.564081 | 0.193015  |
| H  | 0 | -2.655589 | 1.664365  | -1.233618 |
| H  | 0 | -0.422759 | 2.873384  | -0.443137 |
| H  | 0 | 1.455986  | 1.246410  | -0.769221 |
| H  | 0 | 0.247820  | 0.716574  | -1.944805 |
| H  | 0 | -0.198829 | -1.258680 | -0.718456 |
| H  | 0 | -0.898373 | -0.733484 | 1.876405  |
| H  | 0 | 0.596506  | 1.519734  | 1.659877  |
| H  | 0 | -1.126032 | 1.917078  | 1.944805  |

B3LYP/6-31G\* Energy + ZPE = -1217.309954  
B3LYP/6-31G\* Free energy = -1217.345529  
B3LYP/6-31G\* Free energy in DCM = -1217.459154  
B3LYP/6-31G\* Free energy in Tol = -1217.457538  
Number of imaginary frequencies = 0

#### **Diels-Alder reaction of dimethylvinylborane (2) with cyclopentadiene (9)**

##### **Endo transition structure (TS-2+9-N)**

B3LYP/6-31G\* Geometry

|   |   |           |           |          |
|---|---|-----------|-----------|----------|
| C | 0 | -1.419765 | 0.393517  | 0.918765 |
| C | 0 | -1.066448 | 1.749761  | 1.000113 |
| C | 0 | 0.244587  | 1.856260  | 1.506067 |
| C | 0 | -0.376337 | -0.380429 | 1.422898 |
| C | 0 | 0.519162  | 0.541422  | 2.211390 |
| H | 0 | -2.316107 | 0.007943  | 0.445275 |
| H | 0 | -1.650792 | 2.572636  | 0.601233 |
| H | 0 | 0.657880  | 2.795147  | 1.864033 |
| H | 0 | -0.397578 | -1.456400 | 1.551421 |

|   |   |           |           |           |
|---|---|-----------|-----------|-----------|
| H | 0 | 0.108720  | 0.617588  | 3.233505  |
| H | 0 | 1.565973  | 0.247930  | 2.293216  |
| C | 0 | 1.419300  | 1.456799  | -0.155737 |
| C | 0 | 1.363113  | 0.065344  | -0.329700 |
| B | 0 | 0.429759  | -0.714646 | -1.270214 |
| C | 0 | -0.585459 | 0.022569  | -2.248801 |
| C | 0 | 0.560294  | -2.296932 | -1.385535 |
| H | 0 | 2.316107  | 1.903129  | 0.273079  |
| H | 0 | 0.918375  | 2.102440  | -0.871697 |
| H | 0 | 2.108319  | -0.505335 | 0.229295  |
| H | 0 | -0.099261 | 0.118695  | -3.233505 |
| H | 0 | -1.504158 | -0.552104 | -2.425845 |
| H | 0 | -0.870998 | 1.036221  | -1.944411 |
| H | 0 | 1.275150  | -2.748884 | -0.686484 |
| H | 0 | -0.410150 | -2.795147 | -1.245640 |
| H | 0 | 0.879123  | -2.572560 | -2.402788 |

B3LYP/6-31G\* Energy + ZPE = -376.548622  
B3LYP/6-31G\* Free energy = -376.584761  
B3LYP/6-31G\* Free energy in DCM = -376.76047  
B3LYP/6-31G\* Free energy in Tol = -376.758879  
Number of imaginary frequencies = 1 (-423.05)

##### **Exo transition structure (TS-2+9-X)**

B3LYP/6-31G\* Geometry

|   |   |           |           |           |
|---|---|-----------|-----------|-----------|
| C | 0 | -2.101248 | -1.313502 | 0.719139  |
| C | 0 | -1.823942 | -0.006135 | 1.152453  |
| C | 0 | -0.444189 | 0.177514  | 1.199064  |
| C | 0 | -0.890245 | -1.957542 | 0.400504  |
| C | 0 | 0.193974  | -1.181998 | 1.122569  |
| H | 0 | -3.092075 | -1.710856 | 0.523750  |
| H | 0 | -2.565842 | 0.764451  | 1.334841  |
| H | 0 | 0.056593  | 1.062393  | 1.574733  |
| H | 0 | -0.817736 | -3.029459 | 0.238180  |
| H | 0 | 1.187367  | -1.218177 | 0.677562  |
| H | 0 | 0.266501  | -1.584841 | 2.147705  |
| C | 0 | -0.284471 | 0.181820  | -1.320990 |
| C | 0 | -0.425334 | -1.203964 | -1.484707 |
| B | 0 | 1.016406  | 0.986252  | -1.168858 |
| C | 0 | 0.952086  | 2.576599  | -1.171316 |
| C | 0 | 2.458884  | 0.315651  | -1.097904 |
| H | 0 | -1.208274 | 0.753833  | -1.424541 |
| H | 0 | 0.467018  | -1.812775 | -1.621785 |
| H | 0 | -1.299702 | -1.599742 | -1.996036 |
| H | 0 | -0.053003 | 2.987168  | -1.014618 |
| H | 0 | 1.626892  | 3.029459  | -0.431208 |
| H | 0 | 1.300507  | 2.950002  | -2.147705 |
| H | 0 | 2.974225  | 0.587541  | -0.164499 |
| H | 0 | 2.488434  | -0.776895 | -1.187897 |
| H | 0 | 3.092075  | 0.721905  | -1.901093 |

B3LYP/6-31G\* Energy + ZPE = -376.547981  
B3LYP/6-31G\* Free energy = -376.584188  
B3LYP/6-31G\* Free energy in DCM = -376.75911  
B3LYP/6-31G\* Free energy in Tol = -376.75764  
Number of imaginary frequencies = 1 (-425.23)

**Endo product (P-2+9-N)**

B3LYP/6-31G\* Geometry

|   |   |           |           |           |
|---|---|-----------|-----------|-----------|
| C | 0 | -1.316774 | 0.468045  | 1.089214  |
| C | 0 | -1.041364 | 1.780145  | 1.055353  |
| C | 0 | 0.448844  | 1.942539  | 1.320808  |
| C | 0 | 1.183781  | 1.404505  | 0.042450  |
| C | 0 | 0.892726  | -0.131899 | 0.069212  |
| C | 0 | -0.013418 | -0.264882 | 1.376976  |
| C | 0 | 0.679190  | 0.766459  | 2.297633  |
| B | 0 | 0.255045  | -0.859905 | -1.184732 |
| C | 0 | -0.203438 | -0.062685 | -2.469773 |
| C | 0 | 0.074260  | -2.431767 | -1.149644 |
| H | 0 | -2.260048 | -0.012781 | 0.846254  |
| H | 0 | -1.712759 | 2.586355  | 0.775185  |
| H | 0 | 0.775065  | 2.934281  | 1.644664  |
| H | 0 | 2.260048  | 1.603967  | 0.111497  |
| H | 0 | 0.819194  | 1.899039  | -0.862905 |
| H | 0 | 1.825144  | -0.672198 | 0.303140  |
| H | 0 | -0.104819 | -1.287992 | 1.748342  |
| H | 0 | 0.158932  | 0.899953  | 3.252052  |
| H | 0 | 1.738090  | 0.545798  | 2.479793  |
| H | 0 | 0.653176  | 0.465096  | -2.916116 |
| H | 0 | -0.663180 | -0.677495 | -3.252052 |
| H | 0 | -0.913758 | 0.730268  | -2.192958 |
| H | 0 | 0.570728  | -2.885251 | -2.021037 |
| H | 0 | 0.443863  | -2.934281 | -0.248482 |
| H | 0 | -0.989728 | -2.687963 | -1.269372 |

B3LYP/6-31G\* Energy + ZPE = -376.594905

B3LYP/6-31G\* Free energy = -376.631145

B3LYP/6-31G\* Free energy in DCM = -376.809358

B3LYP/6-31G\* Free energy in Tol = -376.808477

Number of imaginary frequencies = 0

**Exo product (P-2+9-X)**

B3LYP/6-31G\* Geometry

|   |   |           |           |           |
|---|---|-----------|-----------|-----------|
| C | 0 | -2.051144 | -1.498214 | 0.943357  |
| C | 0 | -2.166381 | -0.165910 | 0.847475  |
| C | 0 | -0.764071 | 0.423991  | 0.920313  |
| C | 0 | -0.062252 | 0.046778  | -0.440176 |
| C | 0 | 0.099071  | -1.519986 | -0.295571 |
| C | 0 | -0.570446 | -1.816548 | 1.089455  |
| C | 0 | -0.099547 | -0.580863 | 1.891014  |
| B | 0 | 1.302573  | 0.754101  | -0.822551 |
| C | 0 | 1.997048  | 1.833253  | 0.101090  |
| C | 0 | 1.980043  | 0.405221  | -2.210765 |
| H | 0 | -2.835033 | -2.239350 | 0.819930  |
| H | 0 | -3.065944 | 0.402069  | 0.628441  |
| H | 0 | -0.702451 | 1.482573  | 1.184590  |
| H | 0 | -0.754989 | 0.244386  | -1.273058 |
| H | 0 | 1.152234  | -1.828123 | -0.265141 |
| H | 0 | -0.374511 | -2.068602 | -1.114929 |
| H | 0 | -0.323886 | -2.800361 | 1.497830  |
| H | 0 | 0.992210  | -0.487857 | 1.944270  |
| H | 0 | -0.520343 | -0.542050 | 2.900739  |
| H | 0 | 1.515347  | 2.800361  | -0.126212 |
| H | 0 | 1.856452  | 1.678033  | 1.176755  |

|   |   |          |           |           |
|---|---|----------|-----------|-----------|
| H | 0 | 3.065944 | 1.971077  | -0.101314 |
| H | 0 | 2.896428 | -0.175262 | -2.016338 |
| H | 0 | 1.362874 | -0.181289 | -2.900739 |
| H | 0 | 2.323487 | 1.310099  | -2.731990 |

B3LYP/6-31G\* Energy + ZPE = -376.594387

B3LYP/6-31G\* Free energy = -376.630555

B3LYP/6-31G\* Free energy in DCM = -376.809036

B3LYP/6-31G\* Free energy in Tol = -376.808125

Number of imaginary frequencies = 0

**Diels-Alder reaction of vinyl-9-BBN (3) with  
cyclopentadiene (9)**

**Endo transition structure (TS-3+9-N)**

B3LYP/6-31G\* Geometry

|   |   |           |           |           |
|---|---|-----------|-----------|-----------|
| C | 0 | 0.147015  | -2.746973 | -1.286033 |
| C | 0 | 1.084916  | -1.707177 | -1.181555 |
| C | 0 | -0.918215 | -2.326982 | -2.106439 |
| C | 0 | 0.672582  | -0.638527 | -1.973482 |
| C | 0 | -0.377649 | -1.164779 | -2.917978 |
| H | 0 | 0.169209  | -3.668634 | -0.713675 |
| H | 0 | 1.943787  | -1.703415 | -0.520077 |
| H | 0 | -1.648209 | -3.019971 | -2.515428 |
| H | 0 | 1.233377  | 0.273654  | -2.141672 |
| H | 0 | -1.112103 | -0.444024 | -3.278370 |
| H | 0 | 0.141553  | -1.584531 | -3.797348 |
| C | 0 | -2.061500 | -1.175688 | -0.822837 |
| C | 0 | -1.393204 | 0.053001  | -0.702619 |
| B | 0 | -0.512001 | 0.510397  | 0.466202  |
| C | 0 | -0.241025 | -0.308722 | 1.798751  |
| C | 0 | -0.015112 | 2.008771  | 0.626772  |
| C | 0 | 1.238904  | -0.216304 | 2.254066  |
| C | 0 | 1.480816  | 2.057049  | 1.029293  |
| C | 0 | -1.250608 | 0.314172  | 2.816663  |
| C | 0 | -0.986706 | 2.636315  | 1.677237  |
| C | 0 | 1.854977  | 1.200094  | 2.256174  |
| C | 0 | -1.136527 | 1.844979  | 2.997622  |
| H | 0 | -2.949014 | -1.238184 | -1.451799 |
| H | 0 | -2.091733 | -1.846674 | 0.031551  |
| H | 0 | -1.630927 | 0.792087  | -1.471791 |
| H | 0 | -0.493823 | -1.376452 | 1.719881  |
| H | 0 | -0.129607 | 2.595286  | -0.297536 |
| H | 0 | 1.834419  | -0.850611 | 1.582175  |
| H | 0 | 1.356156  | -0.657800 | 3.255902  |
| H | 0 | 1.797910  | 3.095976  | 1.208404  |
| H | 0 | 2.070593  | 1.710874  | 0.166299  |
| H | 0 | -1.140763 | -0.173607 | 3.797348  |
| H | 0 | -2.267262 | 0.075311  | 2.472059  |
| H | 0 | -1.976727 | 2.714214  | 1.204841  |
| H | 0 | -0.680753 | 3.668634  | 1.906837  |
| H | 0 | 2.949014  | 1.111535  | 2.310533  |
| H | 0 | 1.564559  | 1.727728  | 3.169595  |
| H | 0 | -2.028915 | 2.206404  | 3.527060  |
| H | 0 | -0.296575 | 2.072165  | 3.660874  |

B3LYP/6-31G\* Energy + ZPE = -609.865319  
B3LYP/6-31G\* Free energy = -609.906712  
B3LYP/6-31G\* Free energy in DCM = -610.212064  
B3LYP/6-31G\* Free energy in Tol = -610.210854  
Number of imaginary frequencies = 1 (-428.14)

**Exo transition structure (TS-3+9-X)**

B3LYP/6-31G\* Geometry

|     |           |           |           |
|-----|-----------|-----------|-----------|
| C 0 | 3.223093  | 0.705014  | -0.735474 |
| C 0 | 3.164581  | 1.753025  | -1.670833 |
| C 0 | 2.143755  | -0.149299 | -0.938490 |
| C 0 | 1.987673  | 1.623655  | -2.431874 |
| C 0 | 1.552053  | 0.179524  | -2.281240 |
| H 0 | 3.944696  | 0.624073  | 0.070850  |
| H 0 | 3.841683  | 2.600557  | -1.703812 |
| H 0 | 1.979542  | -1.084283 | -0.415657 |
| H 0 | 1.813426  | 2.183022  | -3.346894 |
| H 0 | 0.485335  | -0.012073 | -2.392866 |
| H 0 | 2.085225  | -0.411983 | -3.045588 |
| C 0 | 0.511364  | 1.570909  | -0.035766 |
| C 0 | 0.521075  | 2.391053  | -1.174240 |
| B 0 | -0.488929 | 0.455101  | 0.284378  |
| C 0 | -0.596516 | -0.218036 | 1.718631  |
| C 0 | -1.681153 | -0.038326 | -0.643176 |
| C 0 | -0.591869 | -1.764779 | 1.593327  |
| C 0 | -1.680357 | -1.587088 | -0.754421 |
| C 0 | -1.891656 | 0.369050  | 2.359875  |
| C 0 | -2.971382 | 0.555209  | 0.005862  |
| C 0 | -1.605607 | -2.348658 | 0.586349  |
| C 0 | -3.169754 | 0.229025  | 1.502979  |
| H 0 | 1.201567  | 1.866029  | 0.756786  |
| H 0 | -0.290035 | 2.297434  | -1.895152 |
| H 0 | 0.927977  | 3.397492  | -1.110573 |
| H 0 | 0.239104  | 0.061133  | 2.377866  |
| H 0 | -1.643449 | 0.361303  | -1.668117 |
| H 0 | -0.756378 | -2.229356 | 2.577760  |
| H 0 | 0.420499  | -2.071844 | 1.288336  |
| H 0 | -2.566125 | -1.928962 | -1.311524 |
| H 0 | -0.814644 | -1.878869 | -1.368699 |
| H 0 | -2.066320 | -0.086146 | 3.346894  |
| H 0 | -1.713208 | 1.437757  | 2.549249  |
| H 0 | -2.928800 | 1.647874  | -0.111342 |
| H 0 | -3.858724 | 0.225559  | -0.555996 |
| H 0 | -1.346186 | -3.397492 | 0.385845  |
| H 0 | -2.598495 | -2.380832 | 1.044730  |
| H 0 | -3.573845 | -0.782326 | 1.607846  |
| H 0 | -3.944696 | 0.893465  | 1.909546  |

B3LYP/6-31G\* Energy + ZPE = -609.865808  
B3LYP/6-31G\* Free energy = -609.906901  
B3LYP/6-31G\* Free energy in DCM = -610.212290  
B3LYP/6-31G\* Free energy in Tol = -610.211082  
Number of imaginary frequencies = 1 (-420.73)

**Products**

**Endo product (P-3+9-N)**

B3LYP/6-31G\* Geometry

|     |           |           |           |
|-----|-----------|-----------|-----------|
| C 0 | 0.923354  | -1.999844 | -2.026143 |
| C 0 | 0.923354  | -0.658941 | -2.026143 |
| C 0 | -0.529356 | -2.456421 | -2.026143 |
| C 0 | -0.530694 | -0.201521 | -2.022072 |
| C 0 | -1.096639 | -2.118914 | -0.604917 |
| C 0 | -1.169363 | -1.327843 | -2.869412 |
| C 0 | -1.106879 | -0.543003 | -0.595582 |
| B 0 | -0.497008 | 0.164825  | 0.673733  |
| C 0 | -0.821959 | -0.299620 | 2.151983  |
| C 0 | 0.423118  | 1.451133  | 0.683509  |
| C 0 | 0.528139  | -0.680089 | 2.830950  |
| C 0 | 1.766765  | 1.063789  | 1.371637  |
| C 0 | -1.598523 | 0.851089  | 2.857307  |
| C 0 | -0.359020 | 2.594004  | 1.397824  |
| C 0 | 1.630330  | 0.398383  | 2.757379  |
| C 0 | -0.928408 | 2.239108  | 2.788169  |
| H 0 | 1.780518  | -2.659294 | -1.930666 |
| H 0 | 1.783384  | -0.002300 | -1.941878 |
| H 0 | -0.711687 | -3.485609 | -2.345872 |
| H 0 | -0.711720 | 0.826911  | -2.343959 |
| H 0 | -2.105286 | -2.530062 | -0.484361 |
| H 0 | -0.473478 | -2.550974 | 0.184688  |
| H 0 | -2.266230 | -1.327263 | -2.840487 |
| H 0 | -0.828135 | -1.330801 | -3.909505 |
| H 0 | -2.167144 | -0.223265 | -0.579440 |
| H 0 | -1.462397 | -1.192305 | 2.189699  |
| H 0 | 0.670365  | 1.815121  | -0.323018 |
| H 0 | 0.901553  | -1.594216 | 2.344990  |
| H 0 | 0.354810  | -0.952413 | 3.882584  |
| H 0 | 2.411779  | 1.951073  | 1.455596  |
| H 0 | 2.294810  | 0.369599  | 0.701783  |
| H 0 | -1.783729 | 0.588285  | 3.909505  |
| H 0 | -2.592061 | 0.918197  | 2.388808  |
| H 0 | -1.192923 | 2.888295  | 0.742961  |
| H 0 | 0.279686  | 3.485609  | 1.483363  |
| H 0 | 2.592061  | -0.058189 | 3.027541  |
| H 0 | 1.449042  | 1.163493  | 3.517489  |
| H 0 | -1.663016 | 3.003354  | 3.075755  |
| H 0 | -0.135705 | 2.303410  | 3.539168  |

B3LYP/6-31G\* Energy + ZPE = -609.911733  
B3LYP/6-31G\* Free energy = -609.953307  
B3LYP/6-31G\* Free energy in DCM = -610.262035  
B3LYP/6-31G\* Free energy in Tol = -610.261406  
Number of imaginary frequencies = 0

**Exo product (P-3+9-X)**

B3LYP/6-31G\* Geometry

|     |           |           |           |
|-----|-----------|-----------|-----------|
| C 0 | 3.163376  | 0.647858  | -1.481842 |
| C 0 | 3.163376  | 1.988785  | -1.481842 |
| C 0 | 1.711716  | 0.188339  | -1.481842 |
| C 0 | 1.711853  | 2.443207  | -1.492859 |
| C 0 | 1.152542  | 0.526352  | -0.045349 |
| C 0 | 1.072922  | 1.312042  | -2.330917 |
| C 0 | 1.118622  | 2.109833  | -0.081192 |
| B 0 | -0.261597 | -0.033508 | 0.370026  |
| C 0 | -0.770477 | 0.008316  | 1.868378  |

|   |   |           |           |           |
|---|---|-----------|-----------|-----------|
| C | 0 | -1.314621 | -0.759430 | -0.560028 |
| C | 0 | -0.813065 | -1.477829 | 2.344635  |
| C | 0 | -1.348358 | -2.243103 | -0.070038 |
| C | 0 | -2.137161 | 0.745026  | 1.935898  |
| C | 0 | -2.682541 | -0.024185 | -0.477020 |
| C | 0 | -1.614990 | -2.435272 | 1.437820  |
| C | 0 | -3.209976 | 0.239212  | 0.949188  |
| H | 0 | 4.020966  | -0.009262 | -1.370468 |
| H | 0 | 4.018524  | 2.648834  | -1.372513 |
| H | 0 | 1.532898  | -0.839844 | -1.807068 |
| H | 0 | 1.527222  | 3.470978  | -1.816757 |
| H | 0 | 1.883224  | 0.217285  | 0.715912  |
| H | 0 | -0.023500 | 1.317000  | -2.305573 |
| H | 0 | 1.415176  | 1.307251  | -3.370575 |
| H | 0 | 0.098190  | 2.510956  | -0.013200 |
| H | 0 | 1.694595  | 2.555389  | 0.734970  |
| H | 0 | -0.077637 | 0.537827  | 2.538422  |
| H | 0 | -1.020569 | -0.783981 | -1.617996 |
| H | 0 | -1.207031 | -1.529465 | 3.370575  |
| H | 0 | 0.224319  | -1.840286 | 2.405869  |
| H | 0 | -2.096176 | -2.805527 | -0.648621 |
| H | 0 | -0.377777 | -2.700302 | -0.315613 |
| H | 0 | -2.537949 | 0.703812  | 2.959839  |
| H | 0 | -1.950317 | 1.810425  | 1.733551  |
| H | 0 | -2.572235 | 0.941833  | -0.992630 |
| H | 0 | -3.442551 | -0.578964 | -1.047440 |
| H | 0 | -1.371811 | -3.470993 | 1.711441  |
| H | 0 | -2.684448 | -2.326447 | 1.639633  |
| H | 0 | -3.674026 | -0.669693 | 1.343323  |
| H | 0 | -4.020981 | 0.978241  | 0.896454  |

B3LYP/6-31G\* Energy + ZPE = -609.911675  
B3LYP/6-31G\* Free energy = -609.952682  
B3LYP/6-31G\* Free energy in DCM = -610.262270  
B3LYP/6-31G\* Free energy in Tol = -610.261600  
Number of imaginary frequencies = 0

#### Diels-Alder reaction of methanol vinylboronate (4) with cyclopentadiene (9)

##### Endo transition structure (TS-4+9-N)

B3LYP/6-31G\* Geometry

|   |   |           |           |           |
|---|---|-----------|-----------|-----------|
| C | 0 | -2.726357 | 0.198277  | -0.544932 |
| C | 0 | -1.854985 | 0.867151  | -1.418551 |
| C | 0 | -1.334618 | 1.986993  | -0.774733 |
| C | 0 | -2.724840 | 0.859200  | 0.698511  |
| C | 0 | -2.208165 | 2.258940  | 0.422921  |
| H | 0 | -3.197296 | -0.758548 | -0.744161 |
| H | 0 | -1.551048 | 0.505669  | -2.395162 |
| H | 0 | -0.697067 | 2.732894  | -1.236690 |
| H | 0 | -3.467021 | 0.663788  | 1.467906  |
| H | 0 | -1.729892 | 2.765913  | 1.262856  |
| H | 0 | -3.061433 | 2.878505  | 0.096280  |
| C | 0 | 0.078071  | 0.813220  | 0.878849  |
| C | 0 | -0.971486 | 0.199684  | 1.577640  |
| B | 0 | 0.902468  | 0.074820  | -0.200689 |
| O | 0 | 2.039883  | 0.567359  | -0.805639 |

|   |   |           |           |           |
|---|---|-----------|-----------|-----------|
| O | 0 | 0.484874  | -1.176325 | -0.587554 |
| C | 0 | 1.176808  | -1.896610 | -1.595312 |
| C | 0 | 2.583387  | 1.829778  | -0.471687 |
| H | 0 | 0.429569  | 1.769710  | 1.263133  |
| H | 0 | -1.243463 | 0.572752  | 2.564101  |
| H | 0 | -1.118346 | -0.868798 | 1.454376  |
| H | 0 | 2.234707  | -2.030383 | -1.341061 |
| H | 0 | 0.702016  | -2.878505 | -1.685088 |
| H | 0 | 1.122939  | -1.384153 | -2.564101 |
| H | 0 | 2.888859  | 1.874728  | 0.581859  |
| H | 0 | 3.467021  | 1.990524  | -1.097056 |
| H | 0 | 1.868952  | 2.641817  | -0.660478 |

B3LYP/6-31G\* Energy + ZPE = -527.051557  
B3LYP/6-31G\* Free energy = -527.091530  
B3LYP/6-31G\* Free energy in DCM = -527.274337  
B3LYP/6-31G\* Free energy in Tol = -527.272106  
Number of imaginary frequencies = 1 (-454.11)

##### Exo transition structure (TS-4+9-X)

B3LYP/6-31G\* Geometry

|   |   |           |           |           |
|---|---|-----------|-----------|-----------|
| C | 0 | -2.830548 | 0.520998  | -0.252063 |
| C | 0 | -2.775836 | 1.672149  | -1.054236 |
| C | 0 | -1.658581 | 2.439528  | -0.673687 |
| C | 0 | -1.800494 | 0.569912  | 0.686158  |
| C | 0 | -1.292133 | 1.985946  | 0.725046  |
| H | 0 | -3.502570 | -0.317836 | -0.404730 |
| H | 0 | -3.399045 | 1.860311  | -1.922808 |
| H | 0 | -1.500701 | 3.461316  | -1.007844 |
| H | 0 | -1.654560 | -0.142901 | 1.490867  |
| H | 0 | -0.245882 | 2.104126  | 1.007559  |
| H | 0 | -1.911623 | 2.556151  | 1.439205  |
| C | 0 | -0.072838 | 1.416387  | -1.574874 |
| C | 0 | -0.014882 | 0.164131  | -0.948267 |
| B | 0 | 1.009553  | -0.197580 | 0.153258  |
| O | 0 | 1.222019  | -1.469003 | 0.640006  |
| O | 0 | 1.776003  | 0.807904  | 0.699375  |
| C | 0 | 0.501844  | -2.590982 | 0.163275  |
| C | 0 | 2.734419  | 0.526126  | 1.709476  |
| H | 0 | -0.434260 | 1.492376  | -2.596795 |
| H | 0 | 0.680083  | 2.157396  | -1.315584 |
| H | 0 | -0.564525 | -0.641332 | -1.430779 |
| H | 0 | 0.813814  | -3.461316 | 0.748597  |
| H | 0 | -0.580983 | -2.456743 | 0.281788  |
| H | 0 | 0.714360  | -2.787097 | -0.895481 |
| H | 0 | 2.266716  | 0.082985  | 2.596795  |
| H | 0 | 3.502570  | -0.167230 | 1.347678  |
| H | 0 | 3.207802  | 1.472485  | 1.987425  |

B3LYP/6-31G\* Energy + ZPE = -527.052932  
B3LYP/6-31G\* Free energy = -527.092773  
B3LYP/6-31G\* Free energy in DCM = -527.275223  
B3LYP/6-31G\* Free energy in Tol = -527.273319  
Number of imaginary frequencies = 1 (-452.87)

##### Endo product (P-4+9-N)

B3LYP/6-31G\* Geometry

|   |   |           |           |           |
|---|---|-----------|-----------|-----------|
| C | 0 | -0.978996 | -1.722488 | 1.905495  |
| C | 0 | -0.926994 | -0.385483 | 1.821495  |
| C | 0 | 0.530983  | 0.002487  | 1.620491  |
| C | 0 | 0.442986  | -2.245483 | 1.761498  |
| C | 0 | 0.936989  | -0.451492 | 0.149498  |
| C | 0 | 0.845986  | -2.011490 | 0.263497  |
| C | 0 | 1.223992  | -1.103485 | 2.450493  |
| B | 0 | 0.077004  | 0.221497  | -1.001487 |
| O | 0 | 0.185982  | 1.535492  | -1.387489 |
| O | 0 | -0.840995 | -0.538498 | -1.669487 |
| C | 0 | -1.653999 | 0.020493  | -2.694496 |
| C | 0 | 1.080986  | 2.467500  | -0.809486 |
| H | 0 | -1.868003 | -2.344498 | 1.938500  |
| H | 0 | -1.765998 | 0.303497  | 1.774498  |
| H | 0 | 0.791985  | 1.037491  | 1.857491  |
| H | 0 | 0.621987  | -3.261490 | 2.121498  |
| H | 0 | 1.990990  | -0.167511 | 0.016503  |
| H | 0 | 1.815987  | -2.477493 | 0.052513  |
| H | 0 | 0.112984  | -2.438492 | -0.423484 |
| H | 0 | 2.307991  | -1.153488 | 2.291497  |
| H | 0 | 1.010994  | -1.026489 | 3.522499  |
| H | 0 | -1.043998 | 0.400497  | -3.522499 |
| H | 0 | -2.307991 | -0.774490 | -3.063484 |
| H | 0 | -2.266990 | 0.844498  | -2.313484 |
| H | 0 | 2.042992  | 2.013489  | -0.544487 |
| H | 0 | 1.258980  | 3.261490  | -1.541496 |
| H | 0 | 0.646981  | 2.918488  | 0.091515  |

B3LYP/6-31G\* Energy + ZPE = -527.103407  
B3LYP/6-31G\* Free energy = -527.142881  
B3LYP/6-31G\* Free energy in DCM = -527.330490  
B3LYP/6-31G\* Free energy in Tol = -527.328878  
Number of imaginary frequencies = 0

#### **Exo product (P-4+9-X)**

B3LYP/6-31G\* Geometry

|   |   |           |           |           |
|---|---|-----------|-----------|-----------|
| C | 0 | -2.664682 | -0.080773 | 1.483891  |
| C | 0 | -2.668704 | 1.260088  | 1.511290  |
| C | 0 | -1.219046 | 1.717302  | 1.569132  |
| C | 0 | -1.213078 | -0.537146 | 1.519756  |
| C | 0 | -0.591962 | 1.407413  | 0.165066  |
| C | 0 | -0.607576 | -0.169934 | 0.107375  |
| C | 0 | -0.599433 | 0.572983  | 2.404006  |
| B | 0 | 0.818118  | -0.796168 | -0.193660 |
| O | 0 | 1.393469  | -0.837302 | -1.439594 |
| O | 0 | 1.540474  | -1.326147 | 0.838678  |
| C | 0 | 0.755599  | -0.334778 | -2.602933 |
| C | 0 | 2.830450  | -1.888767 | 0.623494  |
| H | 0 | -3.517505 | -0.737174 | 1.335825  |
| H | 0 | -3.522795 | 1.919963  | 1.390869  |
| H | 0 | -1.046997 | 2.740820  | 1.913135  |
| H | 0 | -1.032309 | -1.568448 | 1.828234  |
| H | 0 | -1.162086 | 1.864662  | -0.650067 |
| H | 0 | 0.426411  | 1.814766  | 0.120855  |
| H | 0 | -1.306272 | -0.492326 | -0.676450 |
| H | 0 | 0.495363  | 0.566721  | 2.406569  |
| H | 0 | -0.973957 | 0.550162  | 3.432435  |

|   |   |           |           |           |
|---|---|-----------|-----------|-----------|
| H | 0 | 1.463142  | -0.423336 | -3.432435 |
| H | 0 | -0.144668 | -0.912030 | -2.847993 |
| H | 0 | 0.475452  | 0.719191  | -2.490222 |
| H | 0 | 3.522795  | -1.149399 | 0.205560  |
| H | 0 | 3.205167  | -2.227721 | 1.593233  |
| H | 0 | 2.782034  | -2.740820 | -0.063762 |

B3LYP/6-31G\* Energy + ZPE = -527.104225  
B3LYP/6-31G\* Free energy = -527.144148  
B3LYP/6-31G\* Free energy in DCM = -527.331516  
B3LYP/6-31G\* Free energy in Tol = -527.329978  
Number of imaginary frequencies = 0

#### **Diels-Alder reaction of pinacol vinylboronate (5) with cyclopentadiene (9)**

##### **Endo transition structure (TS-5+9-N)**

B3LYP/6-31G\* Geometry

|   |   |           |           |           |
|---|---|-----------|-----------|-----------|
| C | 0 | -2.713363 | 0.969580  | -1.993332 |
| C | 0 | -1.409565 | 0.557421  | -2.310723 |
| C | 0 | -0.548789 | 1.648889  | -2.208986 |
| C | 0 | -2.688654 | 2.329375  | -1.634265 |
| C | 0 | -1.405181 | 2.889669  | -2.215709 |
| H | 0 | -3.568896 | 0.310251  | -1.889763 |
| H | 0 | -1.106920 | -0.468827 | -2.488812 |
| H | 0 | 0.505131  | 1.642345  | -2.463740 |
| H | 0 | -3.588033 | 2.931101  | -1.536145 |
| H | 0 | -0.990954 | 3.763623  | -1.710372 |
| H | 0 | -1.600969 | 3.167865  | -3.265942 |
| C | 0 | -0.581975 | 1.946925  | 0.200446  |
| C | 0 | -1.941391 | 2.263912  | 0.320910  |
| B | 0 | -0.008656 | 0.557304  | 0.513749  |
| O | 0 | -0.782931 | -0.570714 | 0.721473  |
| O | 0 | 1.342602  | 0.298537  | 0.651983  |
| C | 0 | 0.082362  | -1.606911 | 1.252906  |
| C | 0 | 1.510488  | -1.137185 | 0.769351  |
| C | 0 | 2.652659  | -1.412127 | 1.747219  |
| C | 0 | 1.882055  | -1.658427 | -0.626619 |
| C | 0 | -0.380338 | -2.956760 | 0.705464  |
| C | 0 | -0.080753 | -1.578963 | 2.779833  |
| H | 0 | 0.122897  | 2.772558  | 0.116149  |
| H | 0 | -2.235323 | 3.290899  | 0.531073  |
| H | 0 | -2.616694 | 1.519639  | 0.732182  |
| H | 0 | 3.588033  | -1.016616 | 1.337956  |
| H | 0 | 2.479830  | -0.932240 | 2.713073  |
| H | 0 | 2.782435  | -2.488660 | 1.908752  |
| H | 0 | 2.780140  | -1.136383 | -0.971692 |
| H | 0 | 2.090378  | -2.733762 | -0.618654 |
| H | 0 | 1.081814  | -1.465867 | -1.348137 |
| H | 0 | -0.410457 | -2.961881 | -0.386635 |
| H | 0 | 0.281771  | -3.763623 | 1.040604  |
| H | 0 | -1.389489 | -3.174137 | 1.070555  |
| H | 0 | 0.489232  | -2.378059 | 3.265942  |
| H | 0 | 0.242152  | -0.619111 | 3.195090  |
| H | 0 | -1.139136 | -1.712512 | 3.024649  |



B3LYP/6-31G\* Energy + ZPE = -683.030070  
B3LYP/6-31G\* Free energy = -683.072457  
B3LYP/6-31G\* Free energy in DCM = -683.343933  
B3LYP/6-31G\* Free energy in Tol = -683.341167  
Number of imaginary frequencies = 1 (-460.34)

**Exo transition structure (TS-5+9-X)**

B3LYP/6-31G\* Geometry

|     |           |           |           |
|-----|-----------|-----------|-----------|
| C 0 | 3.285655  | -2.196402 | -1.509981 |
| C 0 | 3.261140  | -0.792254 | -1.547340 |
| C 0 | 1.963810  | -2.675422 | -1.522481 |
| C 0 | 1.939283  | -0.362557 | -1.648316 |
| C 0 | 1.111276  | -1.548318 | -2.068782 |
| H 0 | 4.170294  | -2.802899 | -1.343129 |
| H 0 | 4.122180  | -0.145989 | -1.409689 |
| H 0 | 1.711014  | -3.720210 | -1.680318 |
| H 0 | 1.628162  | 0.668788  | -1.772971 |
| H 0 | 1.131057  | -1.612335 | -3.170747 |
| H 0 | 0.069819  | -1.537505 | -1.746111 |
| C 0 | 1.344404  | -0.949269 | 0.631364  |
| C 0 | 1.350181  | -2.340397 | 0.467128  |
| B 0 | 0.067452  | -0.096092 | 0.612254  |
| O 0 | -1.178159 | -0.572507 | 0.234690  |
| O 0 | 0.024370  | 1.233873  | 0.985964  |
| C 0 | -2.088069 | 0.557730  | 0.171831  |
| C 0 | -1.369863 | 1.618830  | 1.094871  |
| C 0 | -1.507154 | 3.073026  | 0.645460  |
| C 0 | -1.750725 | 1.491318  | 2.577129  |
| C 0 | -2.171117 | 0.988645  | -1.299519 |
| C 0 | -3.462482 | 0.096992  | 0.656190  |
| H 0 | 2.238501  | -0.490946 | 1.047608  |
| H 0 | 0.398493  | -2.855824 | 0.355534  |
| H 0 | 2.122561  | -2.938238 | 0.942562  |
| H 0 | -1.115260 | 3.223377  | -0.363115 |
| H 0 | -2.555212 | 3.393866  | 0.665324  |
| H 0 | -0.942778 | 3.720210  | 1.324661  |
| H 0 | -1.652628 | 0.457894  | 2.924266  |
| H 0 | -1.071786 | 2.111329  | 3.170747  |
| H 0 | -2.776610 | 1.825948  | 2.764954  |
| H 0 | -1.197628 | 1.320361  | -1.674309 |
| H 0 | -2.492866 | 0.133627  | -1.902649 |
| H 0 | -2.891695 | 1.800606  | -1.444934 |
| H 0 | -4.170294 | 0.933632  | 0.684313  |
| H 0 | -3.859385 | -0.658409 | -0.029930 |
| H 0 | -3.409729 | -0.349040 | 1.651846  |

B3LYP/6-31G\* Energy + ZPE = -683.031328  
B3LYP/6-31G\* Free energy = -683.073860  
B3LYP/6-31G\* Free energy in DCM = -683.345491  
B3LYP/6-31G\* Free energy in Tol = -683.342818  
Number of imaginary frequencies = 1 (-451.44)

**Endo product (P-5+9-N)**

B3LYP/6-31G\* Geometry

|     |          |           |           |
|-----|----------|-----------|-----------|
| C 0 | 0.596967 | -2.032385 | -2.396346 |
| C 0 | 0.596967 | -0.691085 | -2.396346 |

|     |           |           |           |
|-----|-----------|-----------|-----------|
| C 0 | -0.855200 | -2.490931 | -2.396346 |
| C 0 | -0.856736 | -0.235351 | -2.391408 |
| C 0 | -1.423865 | -2.153622 | -0.974278 |
| C 0 | -1.497477 | -1.360858 | -3.235706 |
| C 0 | -1.430000 | -0.585442 | -0.960092 |
| B 0 | -0.659441 | 0.103355  | 0.224957  |
| O 0 | -0.459263 | -0.474949 | 1.456410  |
| O 0 | -0.130744 | 1.372022  | 0.143625  |
| C 0 | 0.447292  | 0.378215  | 2.210116  |
| C 0 | 0.286257  | 1.768938  | 1.479842  |
| C 0 | -0.845695 | 2.632231  | 2.053979  |
| C 0 | 1.565550  | 2.595519  | 1.361085  |
| C 0 | 1.847745  | -0.232535 | 2.061020  |
| C 0 | 0.021281  | 0.358365  | 3.677224  |
| H 0 | 1.454075  | -2.691483 | -2.294222 |
| H 0 | 1.451275  | -0.028944 | -2.296647 |
| H 0 | -1.036160 | -3.519571 | -2.719225 |
| H 0 | -1.038543 | 0.796181  | -2.700052 |
| H 0 | -2.437424 | -2.556208 | -0.862989 |
| H 0 | -0.810920 | -2.583114 | -0.176977 |
| H 0 | -2.594247 | -1.361130 | -3.203335 |
| H 0 | -1.158998 | -1.360092 | -4.277047 |
| H 0 | -2.472712 | -0.232468 | -0.926188 |
| H 0 | -1.024453 | 3.475985  | 1.380240  |
| H 0 | -1.777196 | 2.063179  | 2.135875  |
| H 0 | -0.592751 | 3.028287  | 3.043198  |
| H 0 | 1.355476  | 3.519571  | 0.812827  |
| H 0 | 1.948995  | 2.868914  | 2.350887  |
| H 0 | 2.346849  | 2.055249  | 0.821776  |
| H 0 | 2.165324  | -0.248459 | 1.013729  |
| H 0 | 2.594247  | 0.316955  | 2.644343  |
| H 0 | 1.823122  | -1.266235 | 2.419701  |
| H 0 | 0.649903  | 1.026669  | 4.277047  |
| H 0 | -1.022192 | 0.657277  | 3.800383  |
| H 0 | 0.129846  | -0.655490 | 4.075672  |

B3LYP/6-31G\* Energy + ZPE = -683.083644  
B3LYP/6-31G\* Free energy = -683.125764  
B3LYP/6-31G\* Free energy in DCM = -683.401734  
B3LYP/6-31G\* Free energy in Tol = -683.399421  
Number of imaginary frequencies = 0

**Exo product (P-5+9-X)**

B3LYP/6-31G\* Geometry

|     |           |           |           |
|-----|-----------|-----------|-----------|
| C 0 | -3.378376 | -2.040059 | 1.197079  |
| C 0 | -3.378376 | -0.699121 | 1.197079  |
| C 0 | -1.928263 | -0.241996 | 1.197079  |
| C 0 | -1.361190 | -0.585220 | -0.253556 |
| C 0 | -1.352559 | -2.151396 | -0.226460 |
| C 0 | -1.927539 | -2.496310 | 1.192547  |
| C 0 | -1.279781 | -1.370112 | 2.031975  |
| B 0 | 0.036612  | 0.091309  | -0.496375 |
| O 0 | 0.184778  | 1.315266  | -1.107058 |
| O 0 | 1.238680  | -0.442861 | -0.087517 |
| C 0 | 1.561590  | 1.746541  | -0.919403 |
| C 0 | 2.305922  | 0.383915  | -0.631800 |
| C 0 | 2.801330  | -0.322403 | -1.901131 |
| C 0 | 3.431990  | 0.459525  | 0.397772  |

|     |           |           |           |
|-----|-----------|-----------|-----------|
| C 0 | 2.012908  | 2.483452  | -2.179434 |
| C 0 | 1.560972  | 2.706221  | 0.278563  |
| H 0 | -4.235834 | -2.697541 | 1.088304  |
| H 0 | -4.233560 | -0.038961 | 1.086278  |
| H 0 | -1.749432 | 0.787638  | 1.518397  |
| H 0 | -2.063775 | -0.202525 | -1.002225 |
| H 0 | -0.335703 | -2.547251 | -0.321259 |
| H 0 | -1.956976 | -2.585898 | -1.029087 |
| H 0 | -1.742704 | -3.525876 | 1.510044  |
| H 0 | -1.616588 | -1.370437 | 3.073686  |
| H 0 | -0.184835 | -1.369640 | 1.991645  |
| H 0 | 2.007487  | -0.397529 | -2.650939 |
| H 0 | 3.653915  | 0.198979  | -2.348857 |
| H 0 | 3.116461  | -1.337774 | -1.641407 |
| H 0 | 4.235834  | 1.119027  | 0.050849  |
| H 0 | 3.074137  | 0.824144  | 1.363271  |
| H 0 | 3.856029  | -0.538101 | 0.551045  |
| H 0 | 1.890741  | 1.868281  | -3.073686 |
| H 0 | 1.410798  | 3.388530  | -2.308878 |
| H 0 | 3.064101  | 2.784541  | -2.102392 |
| H 0 | 2.553393  | 3.133300  | 0.457838  |
| H 0 | 0.864812  | 3.525876  | 0.075466  |
| H 0 | 1.230593  | 2.201719  | 1.192136  |

B3LYP/6-31G\* Energy + ZPE = -683.083786

B3LYP/6-31G\* Free energy = -683.125973

B3LYP/6-31G\* Free energy in DCM = -683.402092

B3LYP/6-31G\* Free energy in Tol = -683.399949

Number of imaginary frequencies = 0

#### Diels-Alder reaction of 2-methyl-2,4-pentanediol vinylboronate (6) with cyclopentadiene (9)

##### Re endo transition structure (TS-6+9-ReN)

B3LYP/6-31G\* Geometry

|     |           |           |           |
|-----|-----------|-----------|-----------|
| C 0 | -1.843233 | -0.739515 | -2.252258 |
| C 0 | -0.605723 | -0.077536 | -2.214754 |
| C 0 | -0.824973 | 1.292877  | -2.085450 |
| C 0 | -2.872055 | 0.206876  | -2.098215 |
| C 0 | -2.262672 | 1.546751  | -2.462991 |
| H 0 | -1.976501 | -1.816370 | -2.241665 |
| H 0 | 0.362310  | -0.566175 | -2.173213 |
| H 0 | -0.053810 | 2.054949  | -2.100256 |
| H 0 | -3.918185 | -0.020476 | -2.284205 |
| H 0 | -2.730644 | 2.424049  | -2.013153 |
| H 0 | -2.317890 | 1.658739  | -3.560010 |
| C 0 | -1.659154 | 1.339838  | 0.183554  |
| C 0 | -2.827153 | 0.599065  | -0.034701 |
| B 0 | -0.369260 | 0.744946  | 0.789612  |
| O 0 | -0.285229 | -0.619323 | 0.971294  |
| O 0 | 0.649914  | 1.600078  | 1.148355  |
| C 0 | 0.902326  | -1.215605 | 1.500452  |
| C 0 | 1.620003  | -0.232095 | 2.427425  |
| C 0 | 1.868724  | 1.134021  | 1.758727  |
| C 0 | 2.251290  | 2.184250  | 2.806272  |
| C 0 | 2.944639  | 1.059766  | 0.664940  |
| C 0 | 0.505066  | -2.509461 | 2.201949  |

|     |           |           |           |
|-----|-----------|-----------|-----------|
| H 0 | -1.735947 | 2.425443  | 0.140036  |
| H 0 | -3.790050 | 1.107204  | -0.046749 |
| H 0 | -2.872245 | -0.424601 | 0.324551  |
| H 0 | 1.558183  | -1.465225 | 0.652673  |
| H 0 | 2.570919  | -0.661891 | 2.766022  |
| H 0 | 0.996133  | -0.080023 | 3.318839  |
| H 0 | 3.186247  | 1.914451  | 3.310602  |
| H 0 | 2.382114  | 3.161612  | 2.330127  |
| H 0 | 1.462270  | 2.275402  | 3.560010  |
| H 0 | 2.686659  | 0.324108  | -0.104010 |
| H 0 | 3.041623  | 2.034552  | 0.176195  |
| H 0 | 3.918185  | 0.786667  | 1.088543  |
| H 0 | -0.038102 | -3.161612 | 1.510634  |
| H 0 | 1.390305  | -3.044960 | 2.563794  |
| H 0 | -0.148286 | -2.297251 | 3.055652  |

B3LYP/6-31G\* Energy + ZPE = -683.033027

B3LYP/6-31G\* Free energy = -683.076256

B3LYP/6-31G\* Free energy in DCM = -683.346328

B3LYP/6-31G\* Free energy in Tol = -683.343923

Number of imaginary frequencies = 1 (-459.03)

##### Si endo transition structure (TS-6+9-SiN)

B3LYP/6-31G\* Geometry

|     |           |           |           |
|-----|-----------|-----------|-----------|
| C 0 | -1.297656 | 2.119057  | 0.754067  |
| C 0 | -2.534820 | 1.582808  | 1.145663  |
| C 0 | -3.351827 | 1.442424  | 0.010007  |
| C 0 | -1.322564 | 2.369529  | -0.616832 |
| C 0 | -2.770634 | 2.371379  | -1.038148 |
| H 0 | -0.426615 | 2.209651  | 1.394231  |
| H 0 | -2.763812 | 1.195408  | 2.133141  |
| H 0 | -4.416158 | 1.231838  | 0.068290  |
| H 0 | -0.530298 | 2.849749  | -1.180305 |
| H 0 | -3.180441 | 3.381594  | -0.863381 |
| H 0 | -2.968994 | 2.104949  | -2.077674 |
| C 0 | -2.569692 | -0.284218 | -0.906417 |
| C 0 | -1.329581 | 0.097205  | -1.431946 |
| B 0 | 0.024777  | -0.284616 | -0.793128 |
| O 0 | 1.181415  | -0.035296 | -1.501417 |
| O 0 | 0.036041  | -0.883488 | 0.447340  |
| C 0 | 2.460583  | -0.378653 | -0.960341 |
| C 0 | 2.332183  | -1.556682 | 0.008169  |
| C 0 | 1.252271  | -1.322186 | 1.082324  |
| C 0 | 0.911766  | -2.632682 | 1.798865  |
| C 0 | 1.670445  | -0.254206 | 2.103897  |
| C 0 | 3.398952  | -0.671161 | -2.125922 |
| H 0 | -3.426279 | -0.389120 | -1.570139 |
| H 0 | -2.590876 | -0.948323 | -0.047630 |
| H 0 | -1.308186 | 0.465434  | -2.456792 |
| H 0 | 2.840066  | 0.501034  | -0.419186 |
| H 0 | 3.299619  | -1.754801 | 0.485756  |
| H 0 | 2.065408  | -2.452050 | -0.569948 |
| H 0 | 0.113481  | -2.466379 | 2.529818  |
| H 0 | 0.564481  | -3.381594 | 1.079521  |
| H 0 | 1.786892  | -3.032333 | 2.323874  |
| H 0 | 0.852002  | -0.078032 | 2.809227  |
| H 0 | 2.551872  | -0.577454 | 2.669937  |
| H 0 | 1.905526  | 0.698166  | 1.617520  |



H 0 3.050436 -1.545175 -2.687535  
H 0 3.429056 0.183423 -2.809227  
H 0 4.416158 -0.868210 -1.768386

B3LYP/6-31G\* Energy + ZPE = -683.032867  
B3LYP/6-31G\* Free energy = -683.076002  
B3LYP/6-31G\* Free energy in DCM = -683.346965  
B3LYP/6-31G\* Free energy in Tol = -683.344644  
Number of imaginary frequencies = 1 (-460.73)

**Re exo transition structure (TS-6+9-ReX)**

B3LYP/6-31G\* Geometry

C 0 2.086354 2.354449 -1.809048  
C 0 2.946974 2.608782 -0.728577  
C 0 0.805308 2.099721 -1.321021  
C 0 2.228147 2.456914 0.470341  
C 0 0.763686 2.586093 0.104049  
H 0 2.392616 2.260441 -2.846167  
H 0 4.021479 2.744199 -0.802370  
H 0 -0.075815 1.953752 -1.936266  
H 0 2.611703 2.767177 1.438394  
H 0 0.509556 3.660578 0.097287  
H 0 0.060824 2.071314 0.759560  
C 0 1.330953 -0.077008 -0.419866  
C 0 2.116839 0.351861 0.656271  
B 0 -0.152954 -0.493222 -0.296852  
O 0 -0.839014 -0.216901 0.869986  
O 0 -0.744713 -1.143358 -1.356286  
C 0 -2.212976 -0.589548 1.027919  
C 0 -2.109899 -1.601684 -1.314449  
C 0 -2.537419 -1.801772 0.152593  
C 0 -2.978809 -0.562814 -2.038915  
C 0 -2.136963 -2.934163 -2.069329  
C 0 -2.461779 -0.844964 2.510009  
H 0 1.849440 -0.389122 -1.323787  
H 0 1.672856 0.369838 1.649367  
H 0 3.187887 0.170186 0.653144  
H 0 -2.827996 0.265965 0.711922  
H 0 -2.006845 -2.674391 0.557627  
H 0 -3.610755 -2.022210 0.204156  
H 0 -4.021479 -0.895957 -2.099234  
H 0 -2.957290 0.405779 -1.528582  
H 0 -2.603919 -0.413658 -3.056535  
H 0 -3.151076 -3.348853 -2.098595  
H 0 -1.789160 -2.792044 -3.097806  
H 0 -1.477037 -3.660578 -1.583783  
H 0 -3.519596 -1.064044 2.695052  
H 0 -1.862792 -1.693985 2.857852  
H 0 -2.180997 0.034792 3.097806

B3LYP/6-31G\* Energy + ZPE = -683.033963  
B3LYP/6-31G\* Free energy = -683.077260  
B3LYP/6-31G\* Free energy in DCM = -683.347381  
B3LYP/6-31G\* Free energy in Tol = -683.345089  
Number of imaginary frequencies = 1 (-457.42)

**Si exo transition structure (TS-6+9-SiX)**

B3LYP/6-31G\* Geometry

C 0 -3.707973 -0.801415 -1.763645  
C 0 -3.089095 0.352618 -2.272254  
C 0 -2.280331 0.909599 -1.282427  
C 0 -3.247922 -1.024220 -0.453924  
C 0 -2.695675 0.300371 0.030920  
H 0 -4.316851 -1.490730 -2.340267  
H 0 -3.143610 0.691495 -3.302026  
H 0 -1.751441 1.852365 -1.371031  
H 0 -3.699396 -1.745242 0.221906  
H 0 -1.917333 0.243095 0.792002  
H 0 -3.536161 0.890199 0.436991  
C 0 -0.582112 -0.803034 -1.385148  
C 0 -1.319508 -1.833093 -0.790140  
B 0 0.474611 0.049985 -0.645498  
O 0 0.540889 0.011250 0.732662  
O 0 1.336992 0.816997 -1.398225  
C 0 1.529827 0.752196 1.475992  
C 0 2.750406 1.012632 0.572701  
C 0 2.359716 1.606303 -0.782683  
C 0 1.916925 -0.129177 2.666933  
C 0 0.879826 2.054537 1.966328  
C 0 3.533493 1.691726 -1.751907  
H 0 -0.543385 -0.781974 -2.472133  
H 0 -1.133300 -2.069628 0.255383  
H 0 -1.645693 -2.681560 -1.384947  
H 0 3.268236 0.059435 0.398687  
H 0 3.458133 1.678222 1.082063  
H 0 1.954829 2.618702 -0.635421  
H 0 2.339959 -1.077149 2.318664  
H 0 2.657038 0.370844 3.302026  
H 0 1.033014 -0.352528 3.273583  
H 0 -0.002178 1.824423 2.572844  
H 0 1.578550 2.634377 2.580497  
H 0 0.556407 2.681560 1.129146  
H 0 3.198096 2.086845 -2.715934  
H 0 4.316851 2.349713 -1.358429  
H 0 3.963632 0.698226 -1.920969

B3LYP/6-31G\* Energy + ZPE = -683.033873  
B3LYP/6-31G\* Free energy = -683.077194  
B3LYP/6-31G\* Free energy in DCM = -683.348160  
B3LYP/6-31G\* Free energy in Tol = -683.345650  
Number of imaginary frequencies = 1 (-456.70)

**Re endo product (P-6+9-ReN)**

B3LYP/6-31G\* Geometry

C 0 -0.266770 -1.576179 -2.324435  
C 0 0.851032 -1.227331 -1.670676  
C 0 1.126211 0.237181 -1.986554  
C 0 0.009972 1.072743 -1.241827  
C 0 -1.286999 0.656614 -2.016869  
C 0 -0.750128 -0.352030 -3.090763  
C 0 0.607616 0.301812 -3.441953  
B 0 -0.008665 0.882125 0.328855  
O 0 -1.210384 0.847891 0.988809

|   |   |           |           |           |
|---|---|-----------|-----------|-----------|
| O | 0 | 1.193388  | 0.790008  | 0.984135  |
| C | 0 | -1.274737 | 0.713809  | 2.416328  |
| C | 0 | 0.007900  | 1.244691  | 3.059918  |
| C | 0 | 1.278289  | 0.652813  | 2.420020  |
| C | 0 | 2.518102  | 1.440793  | 2.850896  |
| C | 0 | 1.454987  | -0.838504 | 2.738309  |
| C | 0 | -2.526105 | 1.438504  | 2.897369  |
| H | 0 | -0.812913 | -2.511511 | -2.243628 |
| H | 0 | 1.406580  | -1.819898 | -0.950397 |
| H | 0 | 2.142258  | 0.587678  | -1.794510 |
| H | 0 | 0.214453  | 2.137442  | -1.438026 |
| H | 0 | -1.753905 | 1.519864  | -2.505956 |
| H | 0 | -2.040042 | 0.201053  | -1.368165 |
| H | 0 | -1.442678 | -0.541971 | -3.915233 |
| H | 0 | 0.513595  | 1.325067  | -3.827087 |
| H | 0 | 1.202707  | -0.300438 | -4.136667 |
| H | 0 | -1.381838 | -0.357336 | 2.638068  |
| H | 0 | -0.002045 | 1.035953  | 4.136667  |
| H | 0 | 0.031355  | 2.336846  | 2.942120  |
| H | 0 | 2.666276  | 1.376000  | 3.934803  |
| H | 0 | 3.409302  | 1.043936  | 2.353823  |
| H | 0 | 2.415248  | 2.495754  | 2.576093  |
| H | 0 | 0.592863  | -1.425520 | 2.405466  |
| H | 0 | 2.340525  | -1.223859 | 2.222897  |
| H | 0 | 1.585111  | -0.996453 | 3.815226  |
| H | 0 | -3.409302 | 1.049158  | 2.381400  |
| H | 0 | -2.664145 | 1.302203  | 3.976077  |
| H | 0 | -2.452809 | 2.511511  | 2.687765  |

B3LYP/6-31G\* Energy + ZPE = -683.086442  
B3LYP/6-31G\* Free energy = -683.129379  
B3LYP/6-31G\* Free energy in DCM = -683.404941  
B3LYP/6-31G\* Free energy in Tol = -683.403234  
Number of imaginary frequencies = 0

#### **Si endo product (P-6+9-SiN)**

B3LYP/6-31G\* Geometry

|   |   |           |           |           |
|---|---|-----------|-----------|-----------|
| C | 0 | 0.485022  | 0.147508  | 2.661609  |
| C | 0 | 0.001357  | 1.309668  | 3.124421  |
| C | 0 | 1.019682  | 2.392776  | 2.794831  |
| C | 0 | 0.959906  | 2.594429  | 1.240230  |
| C | 0 | 1.521850  | 1.241303  | 0.685223  |
| C | 0 | 1.831549  | 0.439717  | 2.012283  |
| C | 0 | 2.331030  | 1.582408  | 2.926260  |
| B | 0 | 0.613105  | 0.460057  | -0.347679 |
| O | 0 | 0.848291  | -0.881635 | -0.524299 |
| O | 0 | -0.347205 | 1.136404  | -1.053175 |
| C | 0 | 0.088708  | -1.652846 | -1.466105 |
| C | 0 | -0.442262 | -0.753673 | -2.584222 |
| C | 0 | -1.175769 | 0.489180  | -2.044982 |
| C | 0 | -1.387434 | 1.517763  | -3.158970 |
| C | 0 | -2.513566 | 0.138456  | -1.379444 |
| C | 0 | 0.982371  | -2.775271 | -1.980385 |
| H | 0 | -0.019741 | -0.813335 | 2.632689  |
| H | 0 | -0.982070 | 1.492426  | 3.547646  |
| H | 0 | 0.942518  | 3.318500  | 3.371484  |
| H | 0 | 1.590682  | 3.440534  | 0.942464  |
| H | 0 | -0.055636 | 2.805467  | 0.894334  |

|   |   |           |           |           |
|---|---|-----------|-----------|-----------|
| H | 0 | 2.486211  | 1.433583  | 0.188363  |
| H | 0 | 2.491324  | -0.417873 | 1.866585  |
| H | 0 | 2.528249  | 1.255498  | 3.952778  |
| H | 0 | 3.210009  | 2.106217  | 2.529867  |
| H | 0 | -0.754578 | -2.098301 | -0.919493 |
| H | 0 | -1.109828 | -1.327396 | -3.238700 |
| H | 0 | 0.407195  | -0.422783 | -3.197661 |
| H | 0 | -1.866323 | 2.416619  | -2.757087 |
| H | 0 | -0.427566 | 1.809799  | -3.597519 |
| H | 0 | -2.023297 | 1.109668  | -3.952778 |
| H | 0 | -2.967148 | 1.043038  | -0.962234 |
| H | 0 | -3.210009 | -0.295150 | -2.106474 |
| H | 0 | -2.380622 | -0.576102 | -0.560793 |
| H | 0 | 1.836971  | -2.364160 | -2.529331 |
| H | 0 | 1.366260  | -3.366009 | -1.142795 |
| H | 0 | 0.424924  | -3.440534 | -2.649614 |

B3LYP/6-31G\* Energy + ZPE = -683.086461  
B3LYP/6-31G\* Free energy = -683.128909  
B3LYP/6-31G\* Free energy in DCM = -683.404725  
B3LYP/6-31G\* Free energy in Tol = -683.402930  
Number of imaginary frequencies = 0

#### **Re exo product (P-6+9-ReX)**

B3LYP/6-31G\* Geometry

|   |   |           |           |           |
|---|---|-----------|-----------|-----------|
| C | 0 | 3.520262  | 0.813325  | -1.410824 |
| C | 0 | 3.520262  | 2.154297  | -1.410824 |
| C | 0 | 2.069933  | 0.356291  | -1.410824 |
| C | 0 | 2.069637  | 2.609958  | -1.409005 |
| C | 0 | 1.503453  | 0.699256  | 0.040612  |
| C | 0 | 1.423192  | 1.483092  | -2.248367 |
| C | 0 | 1.489141  | 2.263736  | 0.008439  |
| B | 0 | 0.110621  | -0.003742 | 0.300780  |
| O | 0 | -1.048947 | 0.609246  | -0.107172 |
| O | 0 | 0.115221  | -1.235374 | 0.904201  |
| C | 0 | -2.327303 | -0.021297 | 0.063680  |
| C | 0 | -1.099279 | -1.977512 | 1.153560  |
| C | 0 | -2.283749 | -0.996176 | 1.241888  |
| C | 0 | -1.265824 | -2.997490 | 0.018652  |
| C | 0 | -0.891671 | -2.695879 | 2.489520  |
| C | 0 | -3.369893 | 1.076323  | 0.237251  |
| H | 0 | 4.375496  | 0.153642  | -1.296657 |
| H | 0 | 4.377379  | 2.811984  | -1.299739 |
| H | 0 | 1.892045  | -0.673692 | -1.731919 |
| H | 0 | 1.884939  | 3.639479  | -1.727316 |
| H | 0 | 2.214892  | 0.324877  | 0.785109  |
| H | 0 | 1.761050  | 1.482055  | -3.289903 |
| H | 0 | 0.328693  | 1.483845  | -2.207053 |
| H | 0 | 0.470270  | 2.655717  | 0.095747  |
| H | 0 | 2.087573  | 2.703359  | 0.813020  |
| H | 0 | -2.546511 | -0.571293 | -0.862523 |
| H | 0 | -2.192305 | -0.416335 | 2.170550  |
| H | 0 | -3.227362 | -1.552421 | 1.298864  |
| H | 0 | -2.136830 | -3.639479 | 0.193767  |
| H | 0 | -1.391507 | -2.504238 | -0.950715 |
| H | 0 | -0.375444 | -3.631311 | -0.041842 |
| H | 0 | -1.770299 | -3.295878 | 2.752185  |
| H | 0 | -0.022584 | -3.359157 | 2.430475  |

|     |           |           |           |
|-----|-----------|-----------|-----------|
| H 0 | -0.713366 | -1.970291 | 3.289903  |
| H 0 | -4.377379 | 0.649221  | 0.297755  |
| H 0 | -3.177084 | 1.646937  | 1.152573  |
| H 0 | -3.335354 | 1.767513  | -0.610681 |

B3LYP/6-31G\* Energy + ZPE = -683.086745  
B3LYP/6-31G\* Free energy = -683.129320  
B3LYP/6-31G\* Free energy in DCM = -683.405649  
B3LYP/6-31G\* Free energy in Tol = -683.403696  
Number of imaginary frequencies = 0

#### *Si exo product (P-6+9-SiX)*

B3LYP/6-31G\* Geometry

|     |           |           |           |
|-----|-----------|-----------|-----------|
| C 0 | -3.338043 | -2.248444 | 1.363663  |
| C 0 | -2.763855 | -1.415268 | 2.243607  |
| C 0 | -1.291763 | -1.306564 | 1.877182  |
| C 0 | -1.237045 | -0.466873 | 0.522446  |
| C 0 | -1.890945 | -1.463440 | -0.490540 |
| C 0 | -2.256851 | -2.705826 | 0.396942  |
| C 0 | -1.033463 | -2.734039 | 1.342728  |
| B 0 | 0.237061  | -0.000412 | 0.187622  |
| O 0 | 1.059418  | -0.806839 | -0.558212 |
| O 0 | 0.654633  | 1.205292  | 0.694153  |
| C 0 | 2.422318  | -0.443481 | -0.875610 |
| C 0 | 2.562897  | 1.089203  | -0.812256 |
| C 0 | 1.992615  | 1.677734  | 0.479874  |
| C 0 | 2.677689  | -0.953384 | -2.296280 |
| C 0 | 3.343200  | -1.158310 | 0.122757  |
| C 0 | 1.954895  | 3.201218  | 0.472748  |
| H 0 | -4.396606 | -2.467728 | 1.259735  |
| H 0 | -3.257126 | -0.813980 | 3.001785  |
| H 0 | -0.628113 | -0.936310 | 2.663284  |
| H 0 | -1.852203 | 0.431030  | 0.650223  |
| H 0 | -1.181396 | -1.761292 | -1.269577 |
| H 0 | -2.772583 | -1.040695 | -0.983246 |
| H 0 | -2.469650 | -3.614456 | -0.172607 |
| H 0 | -0.078552 | -2.837463 | 0.815689  |
| H 0 | -1.116882 | -3.498459 | 2.122253  |
| H 0 | 2.022644  | 1.528076  | -1.662292 |
| H 0 | 3.617294  | 1.372452  | -0.917419 |
| H 0 | 2.598465  | 1.345383  | 1.334839  |
| H 0 | 1.984787  | -0.483215 | -3.001800 |
| H 0 | 3.702637  | -0.730865 | -2.613708 |
| H 0 | 2.527252  | -2.037003 | -2.340988 |
| H 0 | 3.167511  | -2.237961 | 0.081772  |
| H 0 | 4.396591  | -0.969910 | -0.114487 |
| H 0 | 3.157608  | -0.827591 | 1.149734  |
| H 0 | 1.508209  | 3.572113  | 1.400467  |
| H 0 | 2.965973  | 3.614471  | 0.382767  |
| H 0 | 1.352585  | 3.565918  | -0.366776 |

B3LYP/6-31G\* Energy + ZPE = -683.086654  
B3LYP/6-31G\* Free energy = -683.129374  
B3LYP/6-31G\* Free energy in DCM = -683.406098  
B3LYP/6-31G\* Free energy in Tol = -683.403930  
Number of imaginary frequencies = 0

#### Diels-Alder reaction of (-)-dimethyl tartrate vinylboronate (7) with cyclopentadiene (9)

#### *Re endo transition structure (TS-7+9-ReN)*

B3LYP/6-31G\* Geometry

|     |           |           |           |
|-----|-----------|-----------|-----------|
| C 0 | -0.146744 | -2.888453 | -2.866637 |
| C 0 | 0.013133  | -1.503112 | -3.029096 |
| C 0 | -1.515465 | -3.207109 | -2.952389 |
| C 0 | -1.230407 | -0.928596 | -3.281237 |
| C 0 | -2.165501 | -2.042098 | -3.676125 |
| H 0 | 0.636685  | -3.577538 | -2.567855 |
| H 0 | 0.929713  | -0.946929 | -2.871273 |
| H 0 | -1.876048 | -4.226276 | -3.063032 |
| H 0 | -1.396942 | 0.120937  | -3.492266 |
| H 0 | -3.224671 | -1.879338 | -3.470401 |
| H 0 | -2.055458 | -2.215415 | -4.760697 |
| C 0 | -2.252135 | -1.255847 | -1.071489 |
| C 0 | -2.227211 | -2.657193 | -1.074930 |
| B 0 | -1.186667 | -0.387892 | -0.415744 |
| O 0 | -1.270058 | 0.997493  | -0.302943 |
| O 0 | -0.011596 | -0.872244 | 0.152263  |
| C 0 | -0.047273 | 1.481227  | 0.205735  |
| C 0 | 0.663678  | 0.197280  | 0.774333  |
| C 0 | 0.504506  | 0.121519  | 2.293717  |
| C 0 | 0.790589  | 2.096414  | -0.915796 |
| O 0 | 1.440066  | 0.893374  | 2.888207  |
| O 0 | -0.348987 | -0.498371 | 2.880375  |
| O 0 | 0.709619  | 1.810725  | -2.088616 |
| O 0 | 1.679153  | 2.971007  | -0.403662 |
| C 0 | 2.581639  | 3.565817  | -1.354233 |
| C 0 | 1.359635  | 0.963218  | 4.323223  |
| H 0 | -3.162839 | -0.762931 | -1.406356 |
| H 0 | -3.161665 | -3.203696 | -1.189784 |
| H 0 | -1.494496 | -3.169382 | -0.458687 |
| H 0 | -0.219961 | 2.235402  | 0.978579  |
| H 0 | 1.730117  | 0.175199  | 0.529340  |
| H 0 | 3.224671  | 4.226276  | -0.772524 |
| H 0 | 2.024121  | 4.132136  | -2.104499 |
| H 0 | 3.172329  | 2.794709  | -1.855623 |
| H 0 | 2.164649  | 1.631576  | 4.629211  |
| H 0 | 1.495249  | -0.029238 | 4.760697  |
| H 0 | 0.389361  | 1.359544  | 4.633713  |

B3LYP/6-31G\* Energy + ZPE = -981.531381  
B3LYP/6-31G\* Free energy = -981.582304  
B3LYP/6-31G\* Free energy in DCM = -981.823968  
B3LYP/6-31G\* Free energy in Tol = -981.817314  
Number of imaginary frequencies = 1 (-445.70)

#### *Si endo transition structure (TS-7+9-SiN)*

B3LYP/6-31G\* Geometry

|     |           |           |           |
|-----|-----------|-----------|-----------|
| C 0 | 2.142366  | 0.989971  | 0.432244  |
| C 0 | 2.089568  | 2.356950  | 0.737514  |
| B 0 | 0.919213  | 0.082473  | 0.367281  |
| O 0 | -0.370374 | 0.465272  | 0.724477  |
| O 0 | 0.948274  | -1.228113 | -0.095592 |

|     |           |           |           |
|-----|-----------|-----------|-----------|
| C 0 | -1.248828 | -0.620732 | 0.531451  |
| C 0 | -0.371835 | -1.708605 | -0.204436 |
| C 0 | -0.781373 | -1.811820 | -1.673338 |
| C 0 | -1.772265 | -1.159026 | 1.861571  |
| O 0 | -0.316158 | -1.156449 | -2.574549 |
| O 0 | -1.784148 | -2.704830 | -1.809878 |
| O 0 | -2.934258 | -1.812603 | 1.659262  |
| O 0 | -1.221418 | -1.065734 | 2.934028  |
| C 0 | -3.504285 | -2.438774 | 2.822889  |
| C 0 | -2.316224 | -2.834443 | -3.140653 |
| H 0 | 3.066727  | 0.602849  | 0.007750  |
| H 0 | 2.862825  | 3.016351  | 0.347514  |
| H 0 | 1.119826  | 2.834422  | 0.840907  |
| H 0 | -2.104111 | -0.310677 | -0.076926 |
| H 0 | -0.460344 | -2.694289 | 0.262499  |
| H 0 | -2.812255 | -3.175350 | 3.239309  |
| H 0 | -4.417955 | -2.921627 | 2.476276  |
| H 0 | -3.729382 | -1.689279 | 3.585838  |
| H 0 | -2.705431 | -1.875446 | -3.492533 |
| H 0 | -3.116525 | -3.570751 | -3.065207 |
| H 0 | -1.539796 | -3.177814 | -3.829071 |
| C 0 | 1.650693  | 2.031882  | 3.428947  |
| C 0 | 1.661086  | 0.628628  | 3.369964  |
| C 0 | 2.748186  | 2.534836  | 2.706358  |
| C 0 | 2.792860  | 0.217529  | 2.669679  |
| C 0 | 3.737765  | 1.389563  | 2.606794  |
| H 0 | 0.839266  | 2.631305  | 3.829071  |
| H 0 | 0.851156  | -0.015292 | 3.690582  |
| H 0 | 3.070918  | 3.570751  | 2.767291  |
| H 0 | 3.096365  | -0.812176 | 2.516787  |
| H 0 | 4.417955  | 1.414845  | 1.753808  |
| H 0 | 4.349730  | 1.389905  | 3.525368  |

B3LYP/6-31G\* Energy + ZPE = -981.531152  
B3LYP/6-31G\* Free energy = -981.583027  
B3LYP/6-31G\* Free energy in DCM = -981.823637  
B3LYP/6-31G\* Free energy in Tol = -981.817120  
Number of imaginary frequencies = 1 (-447.82)

#### **Re exo transition structure (TS-7+9-ReX)**

B3LYP/6-31G\* Geometry

|     |           |           |          |
|-----|-----------|-----------|----------|
| C 0 | 3.172743  | -2.592774 | 2.455007 |
| C 0 | 3.052871  | -1.217951 | 2.717270 |
| C 0 | 1.898102  | -3.116289 | 2.167195 |
| C 0 | 1.706857  | -0.859662 | 2.678830 |
| C 0 | 0.902878  | -2.130135 | 2.746235 |
| H 0 | 4.109734  | -3.129479 | 2.343292 |
| H 0 | 3.881897  | -0.526781 | 2.831071 |
| H 0 | 1.694039  | -4.182654 | 2.120259 |
| H 0 | 1.302921  | 0.122875  | 2.895137 |
| H 0 | 0.756079  | -2.385762 | 3.809909 |
| H 0 | -0.077355 | -2.096415 | 2.269873 |
| C 0 | 1.550150  | -1.098650 | 0.229921 |
| C 0 | 1.587832  | -2.499059 | 0.194237 |
| B 0 | 0.273645  | -0.267632 | 0.222525 |
| O 0 | 0.243307  | 1.111477  | 0.045657 |
| O 0 | -1.013816 | -0.785425 | 0.374217 |
| C 0 | -1.077388 | 1.562547  | 0.273517 |

|     |           |           |           |
|-----|-----------|-----------|-----------|
| C 0 | -1.940665 | 0.262153  | 0.161732  |
| C 0 | -2.646826 | 0.198006  | -1.196910 |
| C 0 | -1.191529 | 2.168462  | 1.673511  |
| O 0 | -2.374105 | -0.918512 | -1.882241 |
| O 0 | -3.382409 | 1.083814  | -1.578328 |
| O 0 | -2.259268 | 2.985403  | 1.738125  |
| O 0 | -0.461431 | 1.922166  | 2.606977  |
| C 0 | -2.519190 | 3.569480  | 3.027834  |
| C 0 | -3.023569 | -1.024316 | -3.162840 |
| H 0 | 2.481822  | -0.565663 | 0.055987  |
| H 0 | 0.653342  | -3.042124 | 0.068657  |
| H 0 | 2.447704  | -3.001485 | -0.239978 |
| H 0 | -1.375378 | 2.306232  | -0.468814 |
| H 0 | -2.728398 | 0.227553  | 0.922797  |
| H 0 | -1.671787 | 4.182559  | 3.344776  |
| H 0 | -2.693966 | 2.789156  | 3.773172  |
| H 0 | -3.410429 | 4.182654  | 2.895346  |
| H 0 | -2.727249 | -0.194872 | -3.809909 |
| H 0 | -4.109734 | -1.012007 | -3.041431 |
| H 0 | -2.691548 | -1.975745 | -3.577834 |

B3LYP/6-31G\* Energy + ZPE = -981.532296  
B3LYP/6-31G\* Free energy = -981.583439  
B3LYP/6-31G\* Free energy in DCM = -981.823936  
B3LYP/6-31G\* Free energy in Tol = -981.817888  
Number of imaginary frequencies = 1 (-440.72)

#### **Si exo transition structure (TS-7+9-SiX)**

B3LYP/6-31G\* Geometry

|     |           |           |           |
|-----|-----------|-----------|-----------|
| C 0 | 3.169304  | -2.236794 | -2.722004 |
| C 0 | 3.214635  | -0.850699 | -2.498803 |
| C 0 | 1.832542  | -2.621028 | -2.940647 |
| C 0 | 1.932723  | -0.324590 | -2.644790 |
| C 0 | 1.093004  | -1.360024 | -3.339041 |
| H 0 | 4.004832  | -2.918468 | -2.596743 |
| H 0 | 4.087555  | -0.296898 | -2.168085 |
| H 0 | 1.554763  | -3.599751 | -3.322662 |
| H 0 | 1.669133  | 0.725488  | -2.600079 |
| H 0 | 1.217799  | -1.223576 | -4.427134 |
| H 0 | 0.026814  | -1.323356 | -3.120373 |
| C 0 | 1.117892  | -1.326819 | -0.540781 |
| C 0 | 1.047275  | -2.646723 | -1.008325 |
| B 0 | -0.059445 | -0.361031 | -0.506265 |
| O 0 | -0.030005 | 0.882165  | 0.120433  |
| O 0 | -1.308899 | -0.611206 | -1.071921 |
| C 0 | -1.336521 | 1.422667  | 0.095086  |
| C 0 | -2.083225 | 0.570116  | -0.981947 |
| C 0 | -2.099964 | 1.293221  | -2.328912 |
| C 0 | -2.062144 | 1.352863  | 1.443859  |
| O 0 | -3.129317 | 2.159874  | -2.374618 |
| O 0 | -1.287125 | 1.147172  | -3.213553 |
| O 0 | -1.256854 | 1.012884  | 2.456750  |
| O 0 | -3.243329 | 1.606984  | 1.552323  |
| C 0 | -3.220805 | 2.955003  | -3.570920 |
| C 0 | -1.888274 | 0.956587  | 3.749271  |
| H 0 | 2.003158  | -1.041575 | 0.022685  |
| H 0 | 0.078194  | -3.042460 | -1.305279 |
| H 0 | 1.718827  | -3.396105 | -0.598670 |

|   |   |           |          |           |
|---|---|-----------|----------|-----------|
| H | 0 | -1.297529 | 2.483310 | -0.179552 |
| H | 0 | -3.107698 | 0.347661 | -0.675300 |
| H | 0 | -2.313954 | 3.550266 | -3.705552 |
| H | 0 | -4.087555 | 3.599751 | -3.426265 |
| H | 0 | -3.359063 | 2.312591 | -4.444296 |
| H | 0 | -2.303220 | 1.932561 | 4.013891  |
| H | 0 | -1.099092 | 0.670570 | 4.444296  |
| H | 0 | -2.691554 | 0.215452 | 3.748982  |

B3LYP/6-31G\* Energy + ZPE = -981.532162  
B3LYP/6-31G\* Free energy = -981.583868  
B3LYP/6-31G\* Free energy in DCM = -981.824608  
B3LYP/6-31G\* Free energy in Tol = -981.818552  
Number of imaginary frequencies = 1 (-441.15)

**Diels-Alder reaction of methanol alkynylboronate (8)  
with cyclopentadiene (9)**

**Transition structure (TS-8+9)**  
B3LYP/6-31G\* Geometry

|   |   |           |           |           |
|---|---|-----------|-----------|-----------|
| C | 0 | 1.062245  | -1.760220 | -0.368855 |
| C | 0 | 1.062245  | -0.507822 | -0.368855 |
| B | 0 | 1.108792  | 1.012855  | -0.368855 |
| O | 0 | 1.270462  | 1.768817  | 0.766172  |
| O | 0 | 1.011534  | 1.667754  | -1.570213 |
| C | 0 | 1.073995  | 3.086585  | -1.621202 |
| C | 0 | 1.379329  | 1.214384  | 2.066380  |
| H | 0 | 1.707493  | -2.621564 | -0.330250 |
| H | 0 | 2.033757  | 3.459246  | -1.244399 |
| H | 0 | 0.961223  | 3.380600  | -2.668801 |
| H | 0 | 0.273569  | 3.546732  | -1.029368 |
| H | 0 | 0.519202  | 1.530372  | 2.668801  |
| H | 0 | 1.415507  | 0.120295  | 2.042506  |
| H | 0 | 2.292071  | 1.595137  | 2.538522  |
| C | 0 | -1.554817 | -0.369759 | -0.439204 |
| C | 0 | -0.754306 | -2.545018 | -0.546503 |
| C | 0 | -1.307329 | -2.310126 | 0.729745  |
| C | 0 | -1.733397 | -0.968350 | 0.797659  |
| C | 0 | -1.313791 | -1.457634 | -1.450030 |
| H | 0 | -1.826114 | 0.646732  | -0.699663 |
| H | 0 | -0.558065 | -3.546732 | -0.920845 |
| H | 0 | -1.262258 | -2.997027 | 1.568355  |
| H | 0 | -2.065396 | -0.463584 | 1.699334  |
| H | 0 | -2.292071 | -1.804509 | -1.827499 |
| H | 0 | -0.693939 | -1.183493 | -2.302783 |

B3LYP/6-31G\* Energy + ZPE = -525.829897  
B3LYP/6-31G\* Free energy = -525.871607  
B3LYP/6-31G\* Free energy in DCM = -526.028934  
B3LYP/6-31G\* Free energy in Tol = -526.02588  
Number of imaginary frequencies = 1 (-427.58)

**Product (P-8+9)**  
B3LYP/6-31G\* Geometry

|   |   |          |           |          |
|---|---|----------|-----------|----------|
| C | 0 | 0.411950 | -2.033125 | 0.392427 |
|---|---|----------|-----------|----------|

|   |   |           |           |           |
|---|---|-----------|-----------|-----------|
| C | 0 | 0.332667  | -0.690952 | 0.295110  |
| C | 0 | 1.809337  | -0.216148 | 0.118924  |
| C | 0 | 1.890491  | -2.451260 | 0.288793  |
| C | 0 | 2.365611  | -2.086728 | -1.133290 |
| C | 0 | 2.315355  | -0.754935 | -1.230931 |
| C | 0 | 2.509543  | -1.243271 | 1.056321  |
| B | 0 | -0.877110 | 0.286819  | 0.239172  |
| O | 0 | -2.173111 | 0.023729  | 0.603247  |
| O | 0 | -0.602486 | 1.552229  | -0.209276 |
| C | 0 | -1.625480 | 2.535411  | -0.299288 |
| C | 0 | -2.623867 | -1.206994 | 1.137693  |
| H | 0 | -0.401686 | -2.746216 | 0.466382  |
| H | 0 | 1.976153  | 0.845590  | 0.301218  |
| H | 0 | 2.128417  | -3.459939 | 0.633282  |
| H | 0 | 2.618249  | -2.810462 | -1.900321 |
| H | 0 | 2.521022  | -0.138837 | -2.099240 |
| H | 0 | 3.602659  | -1.212532 | 0.998569  |
| H | 0 | 2.180523  | -1.176351 | 2.099240  |
| H | 0 | -1.161103 | 3.459939  | -0.653812 |
| H | 0 | -2.408620 | 2.231754  | -1.003511 |
| H | 0 | -2.092577 | 2.715169  | 0.675785  |
| H | 0 | -2.737694 | -1.960872 | 0.348247  |
| H | 0 | -1.936685 | -1.593849 | 1.898774  |
| H | 0 | -3.602659 | -1.033583 | 1.595179  |

B3LYP/6-31G\* Energy + ZPE = -525.891828  
B3LYP/6-31G\* Free energy = -525.93063  
B3LYP/6-31G\* Free energy in DCM = -526.095613  
B3LYP/6-31G\* Free energy in Tol = -526.093705  
Number of imaginary frequencies = 0

**Diels-Alder reaction of vinylboronate de pinacol (5)  
with 1,3-cyclohexadiene (10)**

**Endo transition structure (TS-5+10-N)**  
B3LYP/6-31G\* Geometry

|   |   |           |           |           |
|---|---|-----------|-----------|-----------|
| C | 0 | 0.451511  | -2.651123 | -1.860780 |
| C | 0 | 1.042613  | -1.381928 | -1.740829 |
| C | 0 | -0.859499 | -2.731445 | -2.330881 |
| C | 0 | 0.337448  | -0.274798 | -2.173710 |
| C | 0 | -1.309091 | -1.780293 | -3.430534 |
| C | 0 | -0.600635 | -0.395349 | -3.355306 |
| H | 0 | 0.900750  | -3.503181 | -1.355571 |
| H | 0 | 1.935258  | -1.261422 | -1.132187 |
| H | 0 | -1.342371 | -3.707710 | -2.341747 |
| H | 0 | 0.702154  | 0.723936  | -1.945361 |
| H | 0 | -2.399185 | -1.664966 | -3.407430 |
| H | 0 | -1.076241 | -2.251646 | -4.394134 |
| H | 0 | 0.006291  | -0.253607 | -4.261838 |
| H | 0 | -1.327400 | 0.423005  | -3.356013 |
| C | 0 | -1.918717 | -1.850612 | -0.718192 |
| C | 0 | -1.591428 | -0.495824 | -0.622191 |
| B | 0 | -0.728039 | 0.086654  | 0.507105  |
| O | 0 | -0.108970 | -0.678526 | 1.478561  |
| O | 0 | -0.524354 | 1.442330  | 0.700015  |
| C | 0 | 0.716453  | 0.202380  | 2.283564  |
| C | 0 | 0.065097  | 1.615902  | 2.013777  |



|     |           |           |           |
|-----|-----------|-----------|-----------|
| C 0 | -1.085548 | 1.947041  | 2.975649  |
| C 0 | 1.046366  | 2.786116  | 1.955377  |
| C 0 | 0.656583  | -0.275687 | 3.734355  |
| C 0 | 2.153709  | 0.083946  | 1.756771  |
| H 0 | -2.858331 | -2.141225 | -1.184500 |
| H 0 | -1.584814 | -2.523353 | 0.066741  |
| H 0 | -2.168895 | 0.201723  | -1.226513 |
| H 0 | -1.807254 | 1.125711  | 3.027158  |
| H 0 | -0.723711 | 2.156331  | 3.988098  |
| H 0 | -1.610648 | 2.833759  | 2.607011  |
| H 0 | 0.503085  | 3.707710  | 1.722260  |
| H 0 | 1.550543  | 2.925405  | 2.918828  |
| H 0 | 1.805080  | 2.640102  | 1.183073  |
| H 0 | -0.372649 | -0.342387 | 4.094215  |
| H 0 | 1.104413  | -1.271952 | 3.810882  |
| H 0 | 1.215415  | 0.398263  | 4.394134  |
| H 0 | 2.228809  | 0.427729  | 0.720642  |
| H 0 | 2.858331  | 0.662077  | 2.364370  |
| H 0 | 2.456071  | -0.967656 | 1.787576  |

B3LYP/6-31G\* Energy + ZPE = -722.311779  
B3LYP/6-31G\* Free energy = -722.355824  
B3LYP/6-31G\* Free energy in DCM = -722.654772  
B3LYP/6-31G\* Free energy in Tol = -722.652348  
Number of imaginary frequencies = 1 (-469.22)

#### Exo transition structure (TS-5+10-X)

B3LYP/6-31G\* Geometry

|     |           |           |           |
|-----|-----------|-----------|-----------|
| C 0 | 3.360734  | -1.762389 | -0.887289 |
| C 0 | 3.290328  | -0.359083 | -0.945367 |
| C 0 | 2.169720  | -2.487613 | -0.925997 |
| C 0 | 2.060178  | 0.237814  | -1.147100 |
| C 0 | 1.037134  | -2.008075 | -1.821046 |
| C 0 | 1.022467  | -0.462553 | -1.996821 |
| H 0 | 4.278361  | -2.240921 | -0.551190 |
| H 0 | 4.143966  | 0.236777  | -0.628473 |
| H 0 | 2.216448  | -3.565866 | -0.778571 |
| H 0 | 1.961196  | 1.316030  | -1.042285 |
| H 0 | 1.168039  | -2.481352 | -2.803194 |
| H 0 | 0.073831  | -2.359122 | -1.436928 |
| H 0 | 1.248267  | -0.214371 | -3.044376 |
| H 0 | 0.022904  | -0.067892 | -1.799650 |
| C 0 | 1.323034  | -1.926609 | 0.957453  |
| C 0 | 1.170202  | -0.537665 | 1.023908  |
| B 0 | -0.191176 | 0.165216  | 0.897096  |
| O 0 | -1.316285 | -0.399645 | 0.319745  |
| O 0 | -0.436355 | 1.433037  | 1.386339  |
| C 0 | -2.453892 | 0.438746  | 0.656687  |
| C 0 | -1.769670 | 1.827679  | 0.972086  |
| C 0 | -2.411180 | 2.624239  | 2.108291  |
| C 0 | -1.604900 | 2.724279  | -0.263668 |
| C 0 | -3.421637 | 0.442008  | -0.525552 |
| C 0 | -3.125611 | -0.201122 | 1.880230  |
| H 0 | 0.440068  | -2.541964 | 0.798803  |
| H 0 | 2.100432  | -2.407250 | 1.544625  |
| H 0 | 1.961197  | 0.022895  | 1.516374  |
| H 0 | -3.443793 | 2.898320  | 1.862791  |
| H 0 | -2.412223 | 2.061275  | 3.044376  |

|     |           |           |           |
|-----|-----------|-----------|-----------|
| H 0 | -1.845918 | 3.547391  | 2.272214  |
| H 0 | -0.954609 | 3.565866  | -0.005152 |
| H 0 | -1.139150 | 2.182278  | -1.092936 |
| H 0 | -2.565038 | 3.123983  | -0.607260 |
| H 0 | -2.935549 | 0.771851  | -1.446583 |
| H 0 | -3.802412 | -0.571301 | -0.689873 |
| H 0 | -4.278361 | 1.097049  | -0.329236 |
| H 0 | -4.033557 | 0.336421  | 2.173729  |
| H 0 | -3.399915 | -1.231909 | 1.634759  |
| H 0 | -2.445477 | -0.228862 | 2.737273  |

B3LYP/6-31G\* Energy + ZPE = -722.310849  
B3LYP/6-31G\* Free energy = -722.354971  
B3LYP/6-31G\* Free energy in DCM = -722.653574  
B3LYP/6-31G\* Free energy in Tol = -722.651144  
Number of imaginary frequencies = 1 (-473.20)

#### Endo product (P-5+10-N)

B3LYP/6-31G\* Geometry

|     |           |           |           |
|-----|-----------|-----------|-----------|
| C 0 | 0.597336  | -2.000229 | -2.267715 |
| C 0 | 0.684006  | -0.663696 | -2.245377 |
| C 0 | -0.816559 | -2.532242 | -2.202011 |
| C 0 | -0.650146 | 0.044098  | -2.158203 |
| C 0 | -1.472168 | -2.004166 | -0.895020 |
| C 0 | -1.610062 | -1.945511 | -3.403458 |
| C 0 | -1.373642 | -0.445053 | -0.857010 |
| C 0 | -1.504715 | -0.394882 | -3.379227 |
| B 0 | -0.690750 | 0.121155  | 0.445328  |
| O 0 | -0.161880 | 1.389420  | 0.530807  |
| O 0 | -0.579193 | -0.577530 | 1.624435  |
| C 0 | 0.550171  | 1.492477  | 1.795059  |
| C 0 | -0.117111 | 0.345093  | 2.650452  |
| C 0 | 0.829269  | -0.406982 | 3.584671  |
| C 0 | -1.363037 | 0.803100  | 3.420700  |
| C 0 | 2.032394  | 1.240067  | 1.486800  |
| C 0 | 0.362961  | 2.906921  | 2.341537  |
| H 0 | 1.456116  | -2.664688 | -2.330765 |
| H 0 | 1.620682  | -0.113129 | -2.291580 |
| H 0 | -0.845947 | -3.627090 | -2.224365 |
| H 0 | -0.536255 | 1.131546  | -2.138107 |
| H 0 | -2.519669 | -2.330063 | -0.860657 |
| H 0 | -0.974777 | -2.450714 | -0.028244 |
| H 0 | -2.656479 | -2.269211 | -3.336166 |
| H 0 | -1.211365 | -2.349030 | -4.340622 |
| H 0 | -2.392288 | -0.023773 | -0.883636 |
| H 0 | -1.045959 | -0.021606 | -4.301712 |
| H 0 | -2.498886 | 0.064636  | -3.309631 |
| H 0 | 1.650833  | -0.873459 | 3.036484  |
| H 0 | 1.250351  | 0.265869  | 4.340622  |
| H 0 | 0.279404  | -1.198135 | 4.104630  |
| H 0 | -1.879761 | -0.077576 | 3.814468  |
| H 0 | -1.103348 | 1.455215  | 4.261307  |
| H 0 | -2.059600 | 1.338943  | 2.768082  |
| H 0 | 2.367828  | 1.966782  | 0.740234  |
| H 0 | 2.656494  | 1.350754  | 2.379883  |
| H 0 | 2.187622  | 0.238144  | 1.074600  |
| H 0 | 0.821167  | 3.627106  | 1.656036  |
| H 0 | -0.693420 | 3.165482  | 2.443069  |

H 0 0.845779 3.016663 3.319534

B3LYP/6-31G\* Energy + ZPE = -722.382553  
B3LYP/6-31G\* Free energy = -722.425960  
B3LYP/6-31G\* Free energy in DCM = -722.730500  
B3LYP/6-31G\* Free energy in Tol = -722.728556  
Number of imaginary frequencies = 0

**Exo product (P-5+10-X)**

B3LYP/6-31G\* Geometry

C 0 3.471815 -1.878015 -0.663121  
C 0 3.444332 -0.539592 -0.641474  
C 0 2.108438 -2.524806 -0.748445  
C 0 2.056387 0.055774 -0.700833  
C 0 1.256463 -2.053571 0.465032  
C 0 1.406171 -2.003573 -2.033243  
C 0 1.248181 -0.495668 0.535153  
C 0 1.376830 -0.449131 -2.005057  
B 0 -0.179417 0.164987 0.625344  
O 0 -1.354522 -0.445881 0.252307  
O 0 -0.372983 1.451909 1.073537  
C 0 -2.456851 0.412187 0.662607  
C 0 -1.754252 1.819774 0.802699  
C 0 -2.257493 2.686910 1.955770  
C 0 -1.747410 2.634183 -0.498412  
C 0 -3.552410 0.331395 -0.398961  
C 0 -2.973935 -0.147831 1.994811  
H 0 4.384583 -2.467897 -0.621726  
H 0 4.330859 0.087548 -0.578976  
H 0 2.169676 -3.618338 -0.765875  
H 0 2.074966 1.150031 -0.677321  
H 0 0.239318 -2.447892 0.354674  
H 0 1.665308 -2.475725 1.390012  
H 0 1.937788 -2.367348 -2.919332  
H 0 0.388309 -2.410310 -2.076776  
H 0 1.801638 -0.169354 1.425671  
H 0 1.903692 -0.033223 -2.870691  
H 0 0.344127 -0.082513 -2.053653  
H 0 -3.313988 2.945519 1.819769  
H 0 -2.142372 2.185449 2.919332  
H 0 -1.683350 3.618338 1.990739  
H 0 -1.079046 3.492030 -0.375043  
H 0 -1.380517 2.041011 -1.342078  
H 0 -2.745965 3.009047 -0.747167  
H 0 -3.175124 0.591606 -1.390482  
H 0 -3.943273 -0.690178 -0.444890  
H 0 -4.384583 1.001608 -0.154392  
H 0 -3.850161 0.402781 2.353163  
H 0 -3.259110 -1.194816 1.852604  
H 0 -2.200755 -0.111145 2.768727

B3LYP/6-31G\* Energy + ZPE = -722.381966  
B3LYP/6-31G\* Free energy = -722.425769  
B3LYP/6-31G\* Free energy in DCM = -722.729723  
B3LYP/6-31G\* Free energy in Tol = -722.727700  
Number of imaginary frequencies = 0

**Diels-Alder reaction of pinacol vinylboronate (2) with  
trans-piperylene (11)**

**Ortho endo transition structure (TS-5+11-ON)**

B3LYP/6-31G\* Geometry

C 0 -0.911817 -1.391038 3.158740  
C 0 -0.692019 -0.014802 2.985724  
C 0 0.562821 0.558678 2.929269  
C 0 0.135782 -2.312408 3.245514  
C 0 0.798999 2.016794 2.657440  
H 0 -1.920598 -1.765621 2.994505  
H 0 -1.550654 0.612081 2.746402  
H 0 1.403453 0.020735 3.352787  
H 0 -0.116977 -3.365154 3.356544  
H 0 1.035519 -2.032409 3.786948  
H 0 1.222989 2.514164 3.541337  
H 0 -0.132719 2.531266 2.396154  
H 0 1.503236 2.162235 1.830397  
C 0 1.556647 -1.015510 1.115982  
C 0 1.072276 -2.288333 1.455873  
B 0 0.896038 -0.144859 0.042439  
O 0 -0.275460 -0.489675 -0.609950  
O 0 1.431091 1.041032 -0.436918  
C 0 -0.662258 0.622822 -1.454719  
C 0 0.701305 1.399293 -1.639242  
C 0 1.534206 0.893450 -2.826300  
C 0 0.580141 2.921631 -1.700016  
C 0 -1.269143 0.063150 -2.741499  
C 0 -1.722446 1.424944 -0.686998  
H 0 2.549995 -0.742858 1.470980  
H 0 1.787341 -3.043728 1.780018  
H 0 0.257815 -2.690117 0.858633  
H 0 1.091529 1.178006 -3.786948  
H 0 2.536131 1.329869 -2.765846  
H 0 1.639824 -0.195726 -2.800655  
H 0 -0.007217 3.234584 -2.571117  
H 0 0.110718 3.326118 -0.800311  
H 0 1.577330 3.365154 -1.788311  
H 0 -0.586755 -0.627335 -3.242250  
H 0 -2.187490 -0.483994 -2.504696  
H 0 -1.525637 0.869294 -3.438825  
H 0 -2.549995 0.757218 -0.427477  
H 0 -1.314993 1.832914 0.242597  
H 0 -2.120524 2.251073 -1.285990

B3LYP/6-31G\* Energy + ZPE = -684.215974  
B3LYP/6-31G\* Free energy = -684.260149  
B3LYP/6-31G\* Free energy in DCM = -684.548377  
B3LYP/6-31G\* Free energy in Tol = -684.545949  
Number of imaginary frequencies = 1 (-472.17)

**Meta endo transition structure (TS-5+11-MN)**

B3LYP/6-31G\* Geometry

C 0 0.505965 -1.734464 -2.673159  
C 0 0.548205 -0.332836 -2.696181  
C 0 -0.687757 -2.455776 -2.628104



|     |           |           |           |
|-----|-----------|-----------|-----------|
| C 0 | -0.592138 | 0.447718  | -2.700405 |
| C 0 | -0.679195 | -3.965561 | -2.560934 |
| H 0 | 1.433435  | -2.267580 | -2.464326 |
| H 0 | 1.506252  | 0.146627  | -2.503982 |
| H 0 | -1.543876 | -2.035709 | -3.151664 |
| H 0 | -1.512147 | 0.094121  | -3.148885 |
| H 0 | -0.526533 | 1.525621  | -2.583331 |
| H 0 | -0.605971 | -4.401782 | -3.566748 |
| H 0 | -1.595426 | -4.358262 | -2.106053 |
| H 0 | 0.170979  | -4.334776 | -1.976543 |
| C 0 | -1.741636 | -0.398819 | -0.770921 |
| C 0 | -1.566376 | -1.786670 | -0.798492 |
| B 0 | -0.880794 | 0.532718  | 0.100115  |
| O 0 | 0.242445  | 0.113543  | 0.787705  |
| O 0 | -1.170277 | 1.865813  | 0.328323  |
| C 0 | 0.871890  | 1.284872  | 1.368198  |
| C 0 | -0.319653 | 2.321333  | 1.412211  |
| C 0 | -1.153909 | 2.231761  | 2.698235  |
| C 0 | 0.069185  | 3.774750  | 1.144027  |
| C 0 | 2.008214  | 1.702155  | 0.423558  |
| C 0 | 1.447212  | 0.895384  | 2.729706  |
| H 0 | -2.686439 | -0.009755 | -1.148970 |
| H 0 | -2.429749 | -2.422497 | -0.982398 |
| H 0 | -0.814145 | -2.228720 | -0.151214 |
| H 0 | -2.062219 | 2.829515  | 2.573323  |
| H 0 | -1.455495 | 1.199666  | 2.902782  |
| H 0 | -0.606350 | 2.613225  | 3.566748  |
| H 0 | -0.828301 | 4.401782  | 1.155958  |
| H 0 | 0.752895  | 4.148166  | 1.915309  |
| H 0 | 0.546692  | 3.891945  | 0.168471  |
| H 0 | 2.583308  | 2.543039  | 0.825959  |
| H 0 | 2.686439  | 0.853425  | 0.290508  |
| H 0 | 1.624981  | 1.985410  | -0.561571 |
| H 0 | 2.236616  | 0.148899  | 2.593544  |
| H 0 | 1.886150  | 1.763748  | 3.234642  |
| H 0 | 0.684386  | 0.461873  | 3.380365  |

B3LYP/6-31G\* Energy + ZPE = -684.214226  
B3LYP/6-31G\* Free energy = -684.258840  
B3LYP/6-31G\* Free energy in DCM = -684.545817  
B3LYP/6-31G\* Free energy in Tol = -684.543161  
Number of imaginary frequencies = 1 (-487.65)

#### **Ortho exo transition structure (TS-5+11-OX)**

B3LYP/6-31G\* Geometry

|     |          |           |          |
|-----|----------|-----------|----------|
| C 0 | 3.457883 | -1.737386 | 0.829766 |
| C 0 | 3.445753 | -0.332526 | 0.834291 |
| C 0 | 2.284825 | -2.493235 | 0.859343 |
| C 0 | 2.299210 | 0.425087  | 0.966843 |
| C 0 | 2.283375 | 1.920826  | 0.830660 |
| H 0 | 4.388182 | -2.233471 | 0.557520 |
| H 0 | 4.368731 | 0.183976  | 0.569183 |
| H 0 | 1.443858 | -2.151751 | 1.455701 |
| H 0 | 2.367118 | -3.577406 | 0.811882 |
| H 0 | 1.436254 | -0.016159 | 1.455606 |
| H 0 | 1.417690 | 2.256195  | 0.248522 |
| H 0 | 3.191853 | 2.289182  | 0.341741 |
| H 0 | 2.213841 | 2.403839  | 1.817054 |

|     |           |           |           |
|-----|-----------|-----------|-----------|
| C 0 | 1.083410  | -0.662721 | -1.012608 |
| C 0 | 1.308066  | -2.041572 | -0.878628 |
| B 0 | -0.238983 | -0.012404 | -0.592615 |
| O 0 | -0.605998 | 1.286226  | -0.901556 |
| O 0 | -1.207169 | -0.664803 | 0.152989  |
| C 0 | -2.007474 | 1.442514  | -0.554569 |
| C 0 | -2.219370 | 0.307576  | 0.523159  |
| C 0 | -3.584990 | -0.377340 | 0.484856  |
| C 0 | -1.903352 | 0.759831  | 1.956243  |
| C 0 | -2.809324 | 1.212654  | -1.843919 |
| C 0 | -2.228367 | 2.868948  | -0.052917 |
| H 0 | 1.771133  | -0.095660 | -1.634583 |
| H 0 | 0.457631  | -2.668520 | -0.617170 |
| H 0 | 2.017757  | -2.524792 | -1.545785 |
| H 0 | -4.388182 | 0.336639  | 0.701152  |
| H 0 | -3.621394 | -1.166571 | 1.242968  |
| H 0 | -3.778167 | -0.836656 | -0.487071 |
| H 0 | -2.664530 | 1.445668  | 2.343448  |
| H 0 | -0.930045 | 1.257588  | 2.013522  |
| H 0 | -1.872228 | -0.120436 | 2.606142  |
| H 0 | -2.659305 | 0.199294  | -2.229261 |
| H 0 | -2.462832 | 1.917429  | -2.606142 |
| H 0 | -3.881967 | 1.370997  | -1.689508 |
| H 0 | -3.268714 | 3.018334  | 0.258541  |
| H 0 | -2.012163 | 3.577406  | -0.859122 |
| H 0 | -1.575197 | 3.108788  | 0.789147  |

B3LYP/6-31G\* Energy + ZPE = -684.216450

B3LYP/6-31G\* Free energy = -684.260908

B3LYP/6-31G\* Free energy in DCM = -684.547675

B3LYP/6-31G\* Free energy in Tol = -684.545348

Number of imaginary frequencies = 1 (-475.75)

#### **Meta exo transition structure (TS-5+11-MX)**

B3LYP/6-31G\* Geometry

|     |           |           |           |
|-----|-----------|-----------|-----------|
| C 0 | 3.301593  | -1.394152 | 0.835062  |
| C 0 | 3.289189  | 0.008721  | 0.859538  |
| C 0 | 2.132990  | -2.154464 | 0.825176  |
| C 0 | 2.118780  | 0.741593  | 0.924629  |
| C 0 | 2.177247  | -3.661482 | 0.741427  |
| H 0 | 4.241514  | -1.893136 | 0.598291  |
| H 0 | 4.215543  | 0.528944  | 0.619665  |
| H 0 | 1.273481  | -1.759363 | 1.361075  |
| H 0 | 2.141572  | 1.821374  | 0.805178  |
| H 0 | 1.244667  | 0.354613  | 1.435107  |
| H 0 | 1.276166  | -4.067388 | 0.267657  |
| H 0 | 2.242199  | -4.108356 | 1.743244  |
| H 0 | 3.044609  | -4.006675 | 0.167304  |
| C 0 | 1.077046  | -0.089413 | -1.043519 |
| C 0 | 1.161739  | -1.485018 | -0.975857 |
| B 0 | -0.214618 | 0.661957  | -0.673601 |
| O 0 | -0.529609 | 1.933666  | -1.104276 |
| O 0 | -1.191186 | 0.125195  | 0.147027  |
| C 0 | -1.712332 | 2.368768  | -0.381773 |
| C 0 | -2.348859 | 1.000275  | 0.083244  |
| C 0 | -3.306695 | 0.392893  | -0.951654 |
| C 0 | -3.013577 | 1.022410  | 1.459093  |
| C 0 | -2.576197 | 3.201180  | -1.328621 |

|   |   |           |           |           |
|---|---|-----------|-----------|-----------|
| C | 0 | -1.225672 | 3.242692  | 0.783112  |
| H | 0 | 1.815687  | 0.429263  | -1.649260 |
| H | 0 | 0.265876  | -2.045095 | -0.719098 |
| H | 0 | 1.850532  | -2.013532 | -1.629554 |
| H | 0 | -2.847020 | 0.355528  | -1.944280 |
| H | 0 | -4.241514 | 0.959124  | -1.022521 |
| H | 0 | -3.546817 | -0.632350 | -0.653005 |
| H | 0 | -3.382266 | 0.020789  | 1.703220  |
| H | 0 | -3.867786 | 1.709256  | 1.472435  |
| H | 0 | -2.313044 | 1.322018  | 2.241997  |
| H | 0 | -2.818400 | 2.653165  | -2.241997 |
| H | 0 | -2.034553 | 4.108356  | -1.615617 |
| H | 0 | -3.511084 | 3.504569  | -0.843281 |
| H | 0 | -2.061564 | 3.675329  | 1.343317  |
| H | 0 | -0.620554 | 4.061569  | 0.381587  |
| H | 0 | -0.601701 | 2.672488  | 1.478544  |

B3LYP/6-31G\* Energy + ZPE = -684.214518  
B3LYP/6-31G\* Free energy = -684.259612  
B3LYP/6-31G\* Free energy in DCM = -684.545197  
B3LYP/6-31G\* Free energy in Tol = -684.542929  
Number of imaginary frequencies = 1 (-490.71)

#### Diels-Alder reaction of pinacol vinylboronate (2) with isoprene (12)

##### Meta endo transition structure (TS-5+12-MN)

B3LYP/6-31G\* Geometry

|   |   |           |           |           |
|---|---|-----------|-----------|-----------|
| C | 0 | -0.543174 | -2.004785 | 3.049021  |
| C | 0 | -0.598243 | -0.594438 | 3.070459  |
| C | 0 | 0.568244  | 0.143935  | 3.091796  |
| C | 0 | 0.650771  | -2.715190 | 2.971351  |
| C | 0 | -1.935536 | 0.077038  | 2.829749  |
| H | 0 | -1.471353 | -2.537772 | 2.843493  |
| H | 0 | 0.542938  | 1.226238  | 2.998368  |
| H | 0 | 1.487504  | -0.258743 | 3.495794  |
| H | 0 | 0.605413  | -3.799587 | 2.895152  |
| H | 0 | 1.529556  | -2.354328 | 3.496998  |
| H | 0 | -2.234736 | -0.020622 | 1.778758  |
| H | 0 | -1.904710 | 1.143265  | 3.076128  |
| H | 0 | -2.721092 | -0.383231 | 3.440530  |
| C | 0 | 1.762147  | -0.787976 | 1.108569  |
| C | 0 | 1.493298  | -2.159682 | 1.139037  |
| B | 0 | 0.968627  | 0.218088  | 0.259317  |
| O | 0 | 1.442932  | 1.475755  | -0.064754 |
| O | 0 | -0.251474 | -0.052579 | -0.339929 |
| C | 0 | 0.400191  | 2.174316  | -0.791417 |
| C | 0 | -0.494032 | 0.986750  | -1.324247 |
| C | 0 | -1.994448 | 1.271949  | -1.375631 |
| C | 0 | -0.022983 | 0.432659  | -2.677130 |
| C | 0 | -0.324483 | 3.077183  | 0.216942  |
| C | 0 | 1.058264  | 3.029154  | -1.874554 |
| H | 0 | 2.721092  | -0.460338 | 1.509695  |
| H | 0 | 2.316126  | -2.854335 | 1.298266  |
| H | 0 | 0.703463  | -2.545364 | 0.500540  |
| H | 0 | -2.525821 | 0.376989  | -1.715690 |
| H | 0 | -2.389782 | 1.545567  | -0.394717 |

|   |   |           |           |           |
|---|---|-----------|-----------|-----------|
| H | 0 | -2.215422 | 2.083288  | -2.078964 |
| H | 0 | 1.049568  | 0.214464  | -2.664855 |
| H | 0 | -0.554266 | -0.502459 | -2.880478 |
| H | 0 | -0.226480 | 1.129917  | -3.496998 |
| H | 0 | -0.806792 | 2.487520  | 1.002335  |
| H | 0 | 0.408095  | 3.738660  | 0.690298  |
| H | 0 | -1.085955 | 3.697927  | -0.267421 |
| H | 0 | 1.679273  | 3.799587  | -1.405860 |
| H | 0 | 1.700415  | 2.430957  | -2.524844 |
| H | 0 | 0.304202  | 3.531274  | -2.491888 |

B3LYP/6-31G\* Energy + ZPE = -684.214571  
B3LYP/6-31G\* Free energy = -684.258783  
B3LYP/6-31G\* Free energy in DCM = -684.546372  
B3LYP/6-31G\* Free energy in Tol = -684.543969  
Number of imaginary frequencies = 1 (-487.36)

##### Para endo transition structure (TS-5+12-PN)

B3LYP/6-31G\* Geometry

|   |   |           |           |           |
|---|---|-----------|-----------|-----------|
| C | 0 | -0.472510 | -2.075083 | 2.936810  |
| C | 0 | -0.534093 | -0.663713 | 2.958481  |
| C | 0 | 0.577244  | 0.147137  | 2.947983  |
| C | 0 | 0.769510  | -2.709273 | 2.913336  |
| C | 0 | -1.731593 | -2.848110 | 2.612544  |
| H | 0 | -1.506373 | -0.204663 | 2.781964  |
| H | 0 | 0.478019  | 1.221841  | 2.826144  |
| H | 0 | 1.532052  | -0.184922 | 3.334011  |
| H | 0 | 0.801218  | -3.796027 | 2.863468  |
| H | 0 | 1.602507  | -2.274249 | 3.456045  |
| H | 0 | -2.601939 | -2.413523 | 3.117618  |
| H | 0 | -1.656630 | -3.898239 | 2.912504  |
| H | 0 | -1.941601 | -2.823433 | 1.533320  |
| C | 0 | 1.783300  | -0.788277 | 0.964976  |
| C | 0 | 1.622867  | -2.172674 | 1.079527  |
| B | 0 | 0.867080  | 0.088906  | 0.099250  |
| O | 0 | 1.119113  | 1.415689  | -0.202868 |
| O | 0 | -0.274900 | -0.383034 | -0.525503 |
| C | 0 | 0.228067  | 1.798345  | -1.280531 |
| C | 0 | -0.942773 | 0.745814  | -1.145155 |
| C | 0 | -2.056618 | 1.196138  | -0.189308 |
| C | 0 | -1.552356 | 0.278602  | -2.466611 |
| C | 0 | 1.024303  | 1.655180  | -2.586150 |
| C | 0 | -0.180085 | 3.257394  | -1.078936 |
| H | 0 | 2.720183  | -0.360771 | 1.320634  |
| H | 0 | 2.496788  | -2.789181 | 1.282688  |
| H | 0 | 0.873183  | -2.656800 | 0.459225  |
| H | 0 | -2.720183 | 0.347787  | 0.006642  |
| H | 0 | -1.647988 | 1.533920  | 0.767844  |
| H | 0 | -2.654283 | 2.008603  | -0.616512 |
| H | 0 | -0.801824 | -0.172545 | -3.119462 |
| H | 0 | -2.322398 | -0.474575 | -2.269237 |
| H | 0 | -2.024001 | 1.112882  | -2.998887 |
| H | 0 | 0.445908  | 1.984642  | -3.456045 |
| H | 0 | 1.926487  | 2.271179  | -2.518763 |
| H | 0 | 1.336184  | 0.618595  | -2.748445 |
| H | 0 | 0.704597  | 3.898239  | -1.153444 |
| H | 0 | -0.894249 | 3.575855  | -1.847400 |
| H | 0 | -0.629726 | 3.419696  | -0.096603 |

B3LYP/6-31G\* Energy + ZPE = -684.215501  
B3LYP/6-31G\* Free energy = -684.260445  
B3LYP/6-31G\* Free energy in DCM = -684.545076  
B3LYP/6-31G\* Free energy in Tol = -684.542787  
Number of imaginary frequencies = 1 (-476.66)

**Meta exo transition structure (TS-5+12-MX)**

B3LYP/6-31G\* Geometry

|   |   |           |           |           |
|---|---|-----------|-----------|-----------|
| C | 0 | -2.766703 | -1.815026 | 0.944705  |
| C | 0 | -2.787439 | -0.403860 | 0.988708  |
| C | 0 | -1.599593 | 0.300354  | 1.047396  |
| C | 0 | -1.585575 | -2.544291 | 0.868165  |
| C | 0 | -4.101484 | 0.319347  | 0.769337  |
| H | 0 | -3.703258 | -2.325436 | 0.719945  |
| H | 0 | -1.597994 | 1.383743  | 0.959207  |
| H | 0 | -0.711174 | -0.128218 | 1.493350  |
| H | 0 | -1.643307 | -3.625162 | 0.758689  |
| H | 0 | -0.700548 | -2.204573 | 1.396061  |
| H | 0 | -3.944492 | 1.385815  | 0.579358  |
| H | 0 | -4.746522 | 0.236241  | 1.654102  |
| H | 0 | -4.663306 | -0.096398 | -0.076176 |
| C | 0 | -0.577579 | -0.538744 | -1.009738 |
| C | 0 | -0.685152 | -1.932756 | -0.947438 |
| B | 0 | 0.724498  | 0.195196  | -0.647024 |
| O | 0 | 1.706001  | -0.362591 | 0.154416  |
| O | 0 | 1.051491  | 1.466495  | -1.071124 |
| C | 0 | 2.875776  | 0.494676  | 0.076718  |
| C | 0 | 2.251673  | 1.877203  | -0.363513 |
| C | 0 | 1.796054  | 2.744074  | 0.819143  |
| C | 0 | 3.113155  | 2.705997  | -1.315625 |
| C | 0 | 3.804455  | -0.117398 | -0.981812 |
| C | 0 | 3.566924  | 0.494592  | 1.439408  |
| H | 0 | -1.333472 | -0.000007 | -1.575529 |
| H | 0 | 0.211741  | -2.510478 | -0.736145 |
| H | 0 | -1.405288 | -2.440888 | -1.582992 |
| H | 0 | 1.197443  | 3.576937  | 0.437047  |
| H | 0 | 1.174404  | 2.173166  | 1.516028  |
| H | 0 | 2.646687  | 3.156892  | 1.372018  |
| H | 0 | 3.330441  | 2.163005  | -2.238169 |
| H | 0 | 2.582323  | 3.625162  | -1.584038 |
| H | 0 | 4.061308  | 2.987945  | -0.843188 |
| H | 0 | 3.325873  | -0.138237 | -1.965985 |
| H | 0 | 4.746522  | 0.435020  | -1.064930 |
| H | 0 | 4.034229  | -1.149007 | -0.697181 |
| H | 0 | 2.885545  | 0.796247  | 2.238169  |
| H | 0 | 3.926637  | -0.514139 | 1.667138  |
| H | 0 | 4.430416  | 1.169914  | 1.442723  |

B3LYP/6-31G\* Energy + ZPE = -684.214524  
B3LYP/6-31G\* Free energy = -684.260662  
B3LYP/6-31G\* Free energy in DCM = -684.543873  
B3LYP/6-31G\* Free energy in Tol = -684.541585  
Number of imaginary frequencies = 1 (-494.05)

**Para exo transition structure (TS-5+12-PX)**

B3LYP/6-31G\* Geometry

|   |   |           |           |           |
|---|---|-----------|-----------|-----------|
| C | 0 | 0.928520  | 0.523708  | -0.464114 |
| C | 0 | 0.979724  | 1.921322  | -0.449627 |
| B | 0 | -0.400428 | -0.246689 | -0.437403 |
| O | 0 | -1.586808 | 0.309511  | 0.012209  |
| O | 0 | -0.557062 | -1.554558 | -0.849340 |
| C | 0 | -2.660206 | -0.603718 | -0.337373 |
| C | 0 | -1.897777 | -1.978547 | -0.488744 |
| C | 0 | -1.779558 | -2.758511 | 0.828672  |
| C | 0 | -2.425871 | -2.897320 | -1.590068 |
| C | 0 | -3.713136 | -0.559675 | 0.769347  |
| C | 0 | -3.263600 | -0.094647 | -1.654423 |
| H | 0 | 1.833459  | -0.011606 | -0.739846 |
| H | 0 | 0.045721  | 2.471349  | -0.539300 |
| H | 0 | 1.838884  | 2.427179  | -0.884017 |
| H | 0 | -1.397794 | -2.124677 | 1.635255  |
| H | 0 | -2.742894 | -3.175167 | 1.141839  |
| H | 0 | -1.076092 | -3.585175 | 0.688105  |
| H | 0 | -3.460164 | -3.198977 | -1.387587 |
| H | 0 | -2.388104 | -2.415891 | -2.569846 |
| H | 0 | -1.812373 | -3.802907 | -1.636895 |
| H | 0 | -3.280914 | -0.782350 | 1.747605  |
| H | 0 | -4.153109 | 0.441822  | 0.816131  |
| H | 0 | -4.520359 | -1.274767 | 0.572734  |
| H | 0 | -4.127418 | -0.692333 | -1.964697 |
| H | 0 | -3.592562 | 0.940116  | -1.516191 |
| H | 0 | -2.524043 | -0.107889 | -2.461225 |
| C | 0 | 2.461236  | 2.041020  | 1.938458  |
| C | 0 | 2.452170  | 0.638340  | 2.114354  |
| C | 0 | 1.343394  | -0.147508 | 1.901539  |
| C | 0 | 1.306590  | 2.680885  | 1.492281  |
| C | 0 | 3.786656  | 2.771119  | 1.932471  |
| H | 0 | 3.415278  | 0.144617  | 2.246037  |
| H | 0 | 1.426263  | -1.230596 | 1.919829  |
| H | 0 | 0.338891  | 0.243185  | 2.005461  |
| H | 0 | 1.334142  | 3.754921  | 1.317084  |
| H | 0 | 0.332725  | 2.311942  | 1.794782  |
| H | 0 | 4.520359  | 2.265769  | 2.569846  |
| H | 0 | 3.686151  | 3.802907  | 2.285752  |
| H | 0 | 4.216523  | 2.815195  | 0.920401  |

B3LYP/6-31G\* Energy + ZPE = -684.215046  
B3LYP/6-31G\* Free energy = -684.261140  
B3LYP/6-31G\* Free energy in DCM = -684.544840  
B3LYP/6-31G\* Free energy in Tol = -684.542467  
Number of imaginary frequencies = 1 (-475.74)

## Calculations in toluene

### Dienophiles

#### Dichlorovinylborane (1)

B3LYP/6-31G\* Geometry in Toluene

|    |   |           |           |           |
|----|---|-----------|-----------|-----------|
| C  | 0 | 2.342707  | -0.876190 | 0.000062  |
| C  | 0 | 1.031930  | -1.175428 | 0.000062  |
| B  | 0 | -0.089568 | -0.123603 | 0.000062  |
| Cl | 0 | 0.235301  | 1.619471  | -0.000398 |
| Cl | 0 | -1.785222 | -0.640097 | 0.000324  |
| H  | 0 | 3.110995  | -1.647115 | 0.000062  |
| H  | 0 | 2.695193  | 0.152886  | 0.000062  |
| H  | 0 | 0.742484  | -2.227396 | 0.000062  |

B3LYP/6-31G\* Energy + ZPE = -1023.284946

B3LYP/6-31G\* Free energy = -1023.315449

Number of imaginary frequencies = 0

#### Dimethylvinylborane (2)

B3LYP/6-31G\* Geometry in Toluene

|   |   |           |           |           |
|---|---|-----------|-----------|-----------|
| C | 0 | 2.126876  | -0.082601 | 0.009141  |
| C | 0 | 0.943735  | -0.719490 | -0.011340 |
| B | 0 | -0.449950 | -0.009842 | -0.011309 |
| C | 0 | -0.607959 | 1.562335  | -0.000940 |
| C | 0 | -1.748068 | -0.914708 | -0.000736 |
| H | 0 | 3.081131  | -0.609131 | 0.004473  |
| H | 0 | 2.192859  | 1.003743  | 0.030665  |
| H | 0 | 0.978793  | -1.813413 | -0.033441 |
| H | 0 | -1.084473 | 1.874938  | -0.943464 |
| H | 0 | -1.309388 | 1.871272  | 0.787702  |
| H | 0 | 0.311511  | 2.146031  | 0.113699  |
| H | 0 | -1.881398 | -1.304635 | 1.022821  |
| H | 0 | -2.674249 | -0.390178 | -0.262470 |
| H | 0 | -1.652538 | -1.802642 | -0.640186 |

B3LYP/6-31G\* Energy + ZPE = -182.569868

B3LYP/6-31G\* Free energy = -182.601454

Number of imaginary frequencies = 0

#### Vinyl-9-BBN (3)

B3LYP/6-31G\* Geometry in Toluene

|   |   |           |           |           |
|---|---|-----------|-----------|-----------|
| C | 0 | 3.436593  | -0.000019 | 0.153911  |
| C | 0 | 2.419785  | -0.001095 | -0.725848 |
| B | 0 | 0.915504  | -0.000535 | -0.324181 |
| C | 0 | -0.260719 | -0.000603 | -1.378211 |
| C | 0 | -1.078829 | 1.310187  | -1.175741 |
| C | 0 | -1.546858 | 1.576198  | 0.270906  |
| C | 0 | -0.467411 | 1.311465  | 1.341814  |
| C | 0 | 0.353782  | 0.000228  | 1.153211  |
| C | 0 | -1.079723 | -1.310669 | -1.174694 |
| C | 0 | -1.547874 | -1.575231 | 0.272180  |

|   |   |           |           |           |
|---|---|-----------|-----------|-----------|
| C | 0 | -0.468208 | -1.310364 | 1.342828  |
| H | 0 | 3.261225  | 0.001182  | 1.228504  |
| H | 0 | 4.482973  | -0.000225 | -0.151280 |
| H | 0 | 2.686630  | -0.002212 | -1.787619 |
| H | 0 | 0.099185  | -0.001146 | -2.417997 |
| H | 0 | -1.950606 | 1.316391  | -1.847490 |
| H | 0 | -0.446710 | 2.151038  | -1.498789 |
| H | 0 | -1.875774 | 2.621544  | 0.350648  |
| H | 0 | -2.435612 | 0.975897  | 0.487072  |
| H | 0 | -0.934670 | 1.319873  | 2.338187  |
| H | 0 | 0.243230  | 2.151506  | 1.336996  |
| H | 0 | 1.136315  | 0.000302  | 1.925548  |
| H | 0 | -0.448209 | -2.152216 | -1.497121 |
| H | 0 | -1.951528 | -1.316797 | -1.846407 |
| H | 0 | -2.436218 | -0.974165 | 0.487904  |
| H | 0 | -1.877480 | -2.620294 | 0.352770  |
| H | 0 | 0.241920  | -2.150845 | 1.338606  |
| H | 0 | -0.935414 | -1.317740 | 2.339236  |

B3LYP/6-31G\* Energy + ZPE = -415.887615

B3LYP/6-31G\* Free energy = -415.924346

Number of imaginary frequencies = 0

#### Methanol vinylboronate (4)

B3LYP/6-31G\* Geometry in Toluene

|   |   |           |           |           |
|---|---|-----------|-----------|-----------|
| C | 0 | 2.492048  | -0.766017 | -0.000316 |
| C | 0 | 1.591431  | 0.226868  | -0.000316 |
| B | 0 | 0.045360  | -0.027543 | -0.000316 |
| O | 0 | -0.394794 | -1.322583 | -0.001359 |
| O | 0 | -0.900404 | 0.965123  | 0.000741  |
| C | 0 | -0.570164 | 2.346848  | 0.002025  |
| C | 0 | -1.786509 | -1.621102 | -0.000937 |
| H | 0 | 3.566441  | -0.585899 | -0.000242 |
| H | 0 | 2.180559  | -1.808687 | -0.000400 |
| H | 0 | 1.974911  | 1.249292  | -0.000219 |
| H | 0 | -1.507489 | 2.910275  | 0.003820  |
| H | 0 | 0.006151  | 2.622428  | 0.893477  |
| H | 0 | 0.003982  | 2.624538  | -0.890177 |
| H | 0 | -2.280525 | -1.213502 | 0.888395  |
| H | 0 | -2.281702 | -1.210702 | -0.888317 |
| H | 0 | -1.888385 | -2.709926 | -0.002566 |

B3LYP/6-31G\* Energy + ZPE = -333.076978

B3LYP/6-31G\* Free energy = -333.112074

Number of imaginary frequencies = 0

#### Pinacol vinylboronate (5)

B3LYP/6-31G\* Geometry in Toluene

|   |   |           |           |           |
|---|---|-----------|-----------|-----------|
| C | 0 | -3.695430 | 0.285857  | 0.110789  |
| C | 0 | -2.759657 | -0.643026 | -0.129829 |
| B | 0 | -1.237575 | -0.342656 | -0.064126 |
| O | 0 | -0.275148 | -1.271836 | -0.383265 |
| O | 0 | -0.709838 | 0.870770  | 0.313525  |
| C | 0 | 0.716988  | 0.837466  | 0.019882  |

|   |   |           |           |           |
|---|---|-----------|-----------|-----------|
| C | 0 | 1.017976  | -0.711941 | -0.008500 |
| C | 0 | 1.453165  | 1.622617  | 1.103630  |
| C | 0 | 0.901545  | 1.520187  | -1.342185 |
| C | 0 | 1.362266  | -1.292778 | 1.369422  |
| C | 0 | 2.054465  | -1.155226 | -1.039084 |
| H | 0 | -4.762571 | 0.072521  | 0.065398  |
| H | 0 | -3.423340 | 1.308600  | 0.365901  |
| H | 0 | -3.082991 | -1.654384 | -0.384345 |
| H | 0 | 1.224550  | 1.245080  | 2.102844  |
| H | 0 | 2.537485  | 1.575398  | 0.950984  |
| H | 0 | 1.152131  | 2.674591  | 1.063067  |
| H | 0 | 0.482316  | 2.530001  | -1.291890 |
| H | 0 | 1.959201  | 1.600487  | -1.614385 |
| H | 0 | 0.378807  | 0.976826  | -2.135867 |
| H | 0 | 1.353860  | -2.385456 | 1.305917  |
| H | 0 | 2.355121  | -0.975803 | 1.705613  |
| H | 0 | 0.627751  | -0.992483 | 2.123476  |
| H | 0 | 2.165114  | -2.243975 | -1.003336 |
| H | 0 | 1.759954  | -0.879605 | -2.054325 |
| H | 0 | 3.032453  | -0.708928 | -0.825247 |

B3LYP/6-31G\* Energy + ZPE = -489.056706

B3LYP/6-31G\* Free energy = -489.092211

Number of imaginary frequencies = 0

## Dienes

### Cyclopentadiene (9)

B3LYP/6-31G\* Geometry in Toluene

|   |   |           |           |           |
|---|---|-----------|-----------|-----------|
| C | 0 | 0.735238  | 0.991763  | -0.000018 |
| C | 0 | -0.735273 | 0.991737  | -0.000028 |
| C | 0 | -1.181435 | -0.282037 | -0.000013 |
| C | 0 | 1.181444  | -0.281996 | 0.000026  |
| C | 0 | 0.000021  | -1.217399 | 0.000028  |
| H | 0 | 1.347804  | 1.889010  | -0.000057 |
| H | 0 | -1.347870 | 1.888963  | -0.000030 |
| H | 0 | -2.215083 | -0.612247 | 0.000022  |
| H | 0 | 2.215105  | -0.612170 | 0.000007  |
| H | 0 | 0.000012  | -1.882963 | 0.877727  |
| H | 0 | 0.000055  | -1.883003 | -0.877641 |

B3LYP/6-31G\* Energy + ZPE = -194.01018

B3LYP/6-31G\* Free energy = -194.036781

Number of imaginary frequencies = 0

### Piperylene (11)

#### *s-cis* conformation

B3LYP/6-31G\* Geometry in Toluene

|   |   |           |           |           |
|---|---|-----------|-----------|-----------|
| C | 0 | 1.465457  | 0.519627  | 0.079684  |
| C | 0 | 2.178513  | -0.602985 | -0.088397 |
| C | 0 | 0.009901  | 0.658227  | -0.065207 |
| C | 0 | -0.898318 | -0.309326 | 0.137484  |
| C | 0 | -2.378907 | -0.147961 | -0.041520 |

|   |   |           |           |           |
|---|---|-----------|-----------|-----------|
| H | 0 | 1.999222  | 1.437899  | 0.331820  |
| H | 0 | 3.254312  | -0.617912 | 0.063570  |
| H | 0 | 1.715249  | -1.539899 | -0.389805 |
| H | 0 | -0.346243 | 1.653074  | -0.341390 |
| H | 0 | -0.557432 | -1.292169 | 0.467735  |
| H | 0 | -2.764971 | -0.846097 | -0.797551 |
| H | 0 | -2.920259 | -0.368883 | 0.888823  |
| H | 0 | -2.639756 | 0.868499  | -0.355464 |

B3LYP/6-31G\* Energy + ZPE = -195.194421

B3LYP/6-31G\* Free energy = -195.223488

Number of imaginary frequencies = 0

### Isoprene (12)

#### *s-cis* conformation

B3LYP/6-31G\* Geometry in Toluene

|   |   |           |           |           |
|---|---|-----------|-----------|-----------|
| C | 0 | -2.040879 | -0.109355 | 0.183245  |
| C | 0 | -0.854026 | -0.570607 | -0.230796 |
| C | 0 | 0.449203  | 0.104710  | -0.058705 |
| C | 0 | 0.568721  | 1.441203  | -0.089342 |
| C | 0 | 1.662764  | -0.792394 | 0.135589  |
| H | 0 | -2.957841 | -0.663288 | 0.000670  |
| H | 0 | -2.134546 | 0.828690  | 0.725527  |
| H | 0 | -0.817230 | -1.546852 | -0.719136 |
| H | 0 | 1.528535  | 1.930763  | 0.060454  |
| H | 0 | -0.284502 | 2.086757  | -0.277808 |
| H | 0 | 2.399711  | -0.653251 | -0.664297 |
| H | 0 | 2.166566  | -0.573196 | 1.084143  |
| H | 0 | 1.384612  | -1.850964 | 0.150499  |

B3LYP/6-31G\* Energy + ZPE = -195.193026

B3LYP/6-31G\* Free energy = -195.221906

Number of imaginary frequencies = 0

### Diels-Alder reaction of dichlorovinylborane

#### (1) with cyclopentadiene (9)

#### *Endo* transition structure (TS-1+9-N)

B3LYP/6-31G\* Geometry in Toluene

|    |   |           |           |           |
|----|---|-----------|-----------|-----------|
| C  | 0 | -1.304886 | 0.225091  | -1.519634 |
| C  | 0 | -2.115107 | 0.981406  | -0.651042 |
| C  | 0 | -1.219239 | -1.071959 | -1.040015 |
| C  | 0 | -2.488901 | 0.187386  | 0.452887  |
| C  | 0 | -2.272153 | -1.252206 | 0.016135  |
| H  | 0 | -0.767983 | 0.618592  | -2.376595 |
| H  | 0 | -2.311212 | 2.045148  | -0.749100 |
| H  | 0 | -0.672412 | -1.886842 | -1.502675 |
| H  | 0 | -3.309515 | 0.465762  | 1.109904  |
| H  | 0 | -2.044202 | -1.970210 | 0.804902  |
| H  | 0 | -3.196722 | -1.591457 | -0.482670 |
| C  | 0 | -0.904203 | 0.354463  | 1.693355  |
| C  | 0 | 0.121062  | -0.472527 | 1.196415  |
| B  | 0 | 1.273507  | -0.025232 | 0.347793  |
| Cl | 0 | 2.564695  | -1.168900 | -0.158029 |



|    |   |           |           |           |
|----|---|-----------|-----------|-----------|
| Cl | 0 | 1.503187  | 1.687183  | -0.145591 |
| H  | 0 | -1.460414 | 0.013400  | 2.565349  |
| H  | 0 | -0.760265 | 1.430759  | 1.668180  |
| H  | 0 | 0.101753  | -1.519731 | 1.496687  |

B3LYP/6-31G\* Energy + ZPE = -1217.272914

B3LYP/6-31G\* Free energy = -1217.309243

Number of imaginary frequencies = 1 (-384.25)

#### **Exo transition structure (TS-1+9-X)**

B3LYP/6-31G\* Geometry in Toluene

|    |   |           |           |           |
|----|---|-----------|-----------|-----------|
| C  | 0 | -2.218424 | 1.418526  | -0.389032 |
| C  | 0 | -2.938047 | 0.464132  | 0.357263  |
| C  | 0 | -1.266480 | 0.766537  | -1.157292 |
| C  | 0 | -2.373163 | -0.810564 | 0.151613  |
| C  | 0 | -1.559297 | -0.702401 | -1.124496 |
| H  | 0 | -2.344328 | 2.494798  | -0.319994 |
| H  | 0 | -3.719043 | 0.693152  | 1.076917  |
| H  | 0 | -0.579531 | 1.237800  | -1.852337 |
| H  | 0 | -2.889577 | -1.727675 | 0.424992  |
| H  | 0 | -0.695478 | -1.362130 | -1.206423 |
| H  | 0 | -2.233365 | -0.935274 | -1.967197 |
| C  | 0 | -0.813352 | -0.840158 | 1.458787  |
| C  | 0 | 0.081177  | 0.182654  | 1.095649  |
| B  | 0 | 1.349957  | 0.029951  | 0.311516  |
| Cl | 0 | 2.463557  | 1.418774  | 0.072586  |
| Cl | 0 | 1.905907  | -1.536456 | -0.378509 |
| H  | 0 | -0.526338 | -1.870916 | 1.258925  |
| H  | 0 | -1.401678 | -0.722689 | 2.365211  |
| H  | 0 | -0.115811 | 1.171400  | 1.508048  |

B3LYP/6-31G\* Energy + ZPE = -1217.272132

B3LYP/6-31G\* Free energy = -1217.308453

Number of imaginary frequencies = 1 (-385.97)

#### **Diels-Alder reaction of dimethylvinylborane (2) with cyclopentadiene (9)**

##### **Endo transition structure (TS-2+9-N)**

B3LYP/6-31G\* Geometry in Toluene

|   |   |           |           |           |
|---|---|-----------|-----------|-----------|
| C | 0 | -0.834437 | 0.319079  | -1.495395 |
| C | 0 | -1.709323 | 1.040189  | -0.667082 |
| C | 0 | -2.070681 | 0.237565  | 0.434780  |
| C | 0 | -0.671507 | -0.964852 | -0.978256 |
| C | 0 | -1.786598 | -1.191278 | 0.010539  |
| H | 0 | -0.296080 | 0.728387  | -2.344615 |
| H | 0 | -1.952131 | 2.092987  | -0.779614 |
| H | 0 | -2.902381 | 0.485758  | 1.089776  |
| H | 0 | -0.107995 | -1.764995 | -1.446299 |
| H | 0 | -2.665619 | -1.554577 | -0.550705 |
| H | 0 | -1.587216 | -1.902246 | 0.812896  |
| C | 0 | -0.447216 | 0.424026  | 1.696029  |

|   |   |           |           |           |
|---|---|-----------|-----------|-----------|
| C | 0 | 0.552976  | -0.399607 | 1.153980  |
| B | 0 | 1.698264  | 0.022839  | 0.222880  |
| C | 0 | 1.932592  | 1.542387  | -0.190799 |
| C | 0 | 2.782093  | -1.048132 | -0.242561 |
| H | 0 | -0.993614 | 0.085612  | 2.576252  |
| H | 0 | -0.326018 | 1.503221  | 1.655646  |
| H | 0 | 0.522259  | -1.443338 | 1.476803  |
| H | 0 | 2.684769  | 1.970655  | 0.492127  |
| H | 0 | 2.350865  | 1.651151  | -1.200398 |
| H | 0 | 1.046355  | 2.183526  | -0.118836 |
| H | 0 | 2.572410  | -2.077024 | 0.076386  |
| H | 0 | 2.902778  | -1.052284 | -1.335830 |
| H | 0 | 3.772901  | -0.777282 | 0.154603  |

B3LYP/6-31G\* Energy + ZPE = -376.550977

B3LYP/6-31G\* Free energy = -376.587106

Number of imaginary frequencies = 1 (-420.71)

##### **Exo transition structure (TS-2+9-X)**

B3LYP/6-31G\* Geometry in Toluene

|   |   |           |           |           |
|---|---|-----------|-----------|-----------|
| C | 0 | -2.473225 | 0.363124  | -0.389498 |
| C | 0 | -1.699392 | 1.420761  | 0.117757  |
| C | 0 | -0.699691 | 0.903729  | 0.938322  |
| C | 0 | -1.916721 | -0.859039 | 0.037095  |
| C | 0 | -1.057990 | -0.524626 | 1.241121  |
| H | 0 | -3.280008 | 0.466709  | -1.109514 |
| H | 0 | -1.809435 | 2.466165  | -0.155683 |
| H | 0 | -0.005718 | 1.493856  | 1.527259  |
| H | 0 | -2.442436 | -1.807208 | -0.047323 |
| H | 0 | -0.222277 | -1.195463 | 1.435565  |
| H | 0 | -1.712098 | -0.533092 | 2.130573  |
| C | 0 | 0.536926  | -0.049482 | -1.065754 |
| C | 0 | -0.324473 | -1.140469 | -1.260280 |
| B | 0 | 1.811469  | 0.005978  | -0.212382 |
| C | 0 | 2.729196  | 1.306978  | -0.264185 |
| C | 0 | 2.333331  | -1.214841 | 0.668200  |
| H | 0 | 0.313667  | 0.827390  | -1.677243 |
| H | 0 | -0.039886 | -2.114061 | -0.863504 |
| H | 0 | -0.915010 | -1.203734 | -2.171641 |
| H | 0 | 2.245981  | 2.180331  | -0.719625 |
| H | 0 | 3.100631  | 1.600451  | 0.728100  |
| H | 0 | 3.631168  | 1.092391  | -0.859748 |
| H | 0 | 2.418155  | -0.928131 | 1.727223  |
| H | 0 | 1.735483  | -2.132972 | 0.619766  |
| H | 0 | 3.356671  | -1.479331 | 0.361033  |

B3LYP/6-31G\* Energy + ZPE = -376.55022

B3LYP/6-31G\* Free energy = -376.586469

Number of imaginary frequencies = 1 (-422.94)

#### **Diels-Alder reaction of vinyl-9-BBN (3) with cyclopentadiene (9)**

##### **Endo transition structure (TS-3+9-N)**

B3LYP/6-31G\* Geometry in Toluene

|   |   |           |           |           |
|---|---|-----------|-----------|-----------|
| C | 0 | 2.996452  | 0.553744  | 1.179078  |
| C | 0 | 2.213232  | 1.420973  | 0.399888  |
| C | 0 | 3.460286  | -0.502976 | 0.369623  |
| C | 0 | 2.214065  | 0.976370  | -0.919837 |
| C | 0 | 3.350014  | -0.003925 | -1.059022 |
| H | 0 | 3.108813  | 0.610861  | 2.257961  |
| H | 0 | 1.633187  | 2.254414  | 0.781924  |
| H | 0 | 4.260756  | -1.168969 | 0.682691  |
| H | 0 | 1.749121  | 1.485225  | -1.757568 |
| H | 0 | 3.242249  | -0.766624 | -1.830953 |
| H | 0 | 4.264964  | 0.572854  | -1.282558 |
| C | 0 | 1.839228  | -1.767819 | 0.287569  |
| C | 0 | 0.934918  | -1.195065 | -0.622530 |
| B | 0 | -0.330332 | -0.401736 | -0.283077 |
| C | 0 | -0.895171 | -0.136040 | 1.177692  |
| C | 0 | -1.418380 | -0.014653 | -1.373033 |
| C | 0 | -1.417912 | 1.314302  | 1.348279  |
| C | 0 | -1.874972 | 1.456457  | -1.200830 |
| C | 0 | -2.002831 | -1.225753 | 1.344246  |
| C | 0 | -2.556802 | -1.068654 | -1.191224 |
| C | 0 | -2.337484 | 1.834863  | 0.221518  |
| C | 0 | -3.095277 | -1.220957 | 0.250685  |
| H | 0 | 2.439643  | -2.620826 | -0.028074 |
| H | 0 | 1.580732  | -1.792427 | 1.343194  |
| H | 0 | 1.106819  | -1.445422 | -1.672832 |
| H | 0 | -0.157281 | -0.314287 | 1.974144  |
| H | 0 | -1.045459 | -0.128026 | -2.402820 |
| H | 0 | -0.543536 | 1.977201  | 1.413572  |
| H | 0 | -1.940901 | 1.419287  | 2.311901  |
| H | 0 | -2.679349 | 1.696392  | -1.913739 |
| H | 0 | -1.028064 | 2.103229  | -1.477871 |
| H | 0 | -2.481475 | -1.125570 | 2.330834  |
| H | 0 | -1.510336 | -2.209217 | 1.344980  |
| H | 0 | -2.160392 | -2.041276 | -1.517909 |
| H | 0 | -3.395671 | -0.842447 | -1.867912 |
| H | 0 | -2.405839 | 2.929413  | 0.295993  |
| H | 0 | -3.357684 | 1.472206  | 0.380023  |
| H | 0 | -3.667733 | -2.156739 | 0.317509  |
| H | 0 | -3.817111 | -0.425776 | 0.460284  |

B3LYP/6-31G\* Energy + ZPE = -609.867927  
B3LYP/6-31G\* Free energy = -609.909333  
Number of imaginary frequencies = 1 (-426.56)

**Exo transition structure (TS-3+9-X)**

B3LYP/6-31G\* Geometry in Toluene

|   |   |          |           |           |
|---|---|----------|-----------|-----------|
| C | 0 | 3.200910 | 0.951451  | -1.003329 |
| C | 0 | 3.953633 | -0.109103 | -0.468271 |
| C | 0 | 2.146065 | 1.241962  | -0.143603 |
| C | 0 | 3.328601 | -0.569343 | 0.706913  |
| C | 0 | 2.426035 | 0.558986  | 1.166060  |
| H | 0 | 3.366913 | 1.412208  | -1.972788 |
| H | 0 | 4.797965 | -0.586804 | -0.957176 |

|   |   |           |           |           |
|---|---|-----------|-----------|-----------|
| H | 0 | 1.451443  | 2.065918  | -0.262715 |
| H | 0 | 3.819457  | -1.234869 | 1.413011  |
| H | 0 | 1.553089  | 0.265459  | 1.748294  |
| H | 0 | 3.033037  | 1.241192  | 1.786688  |
| C | 0 | 0.957451  | -0.931912 | -0.760967 |
| C | 0 | 1.798803  | -1.765419 | -0.006460 |
| B | 0 | -0.378271 | -0.330564 | -0.317637 |
| C | 0 | -1.391806 | 0.356598  | -1.330513 |
| C | 0 | -1.055425 | -0.482719 | 1.112790  |
| C | 0 | -1.846673 | 1.737593  | -0.788486 |
| C | 0 | -1.519669 | 0.900197  | 1.644744  |
| C | 0 | -2.550900 | -0.668637 | -1.524879 |
| C | 0 | -2.213241 | -1.509837 | 0.908385  |
| C | 0 | -2.368677 | 1.737735  | 0.664279  |
| C | 0 | -3.211648 | -1.167118 | -0.220010 |
| H | 0 | 1.230269  | -0.824948 | -1.813171 |
| H | 0 | 1.463128  | -2.097386 | 0.975391  |
| H | 0 | 2.433550  | -2.489768 | -0.512084 |
| H | 0 | -0.945231 | 0.523793  | -2.322739 |
| H | 0 | -0.391290 | -0.918121 | 1.875281  |
| H | 0 | -2.615830 | 2.173205  | -1.445299 |
| H | 0 | -0.984745 | 2.419779  | -0.849901 |
| H | 0 | -2.077078 | 0.778521  | 2.586532  |
| H | 0 | -0.619806 | 1.477875  | 1.906065  |
| H | 0 | -3.325851 | -0.246337 | -2.183489 |
| H | 0 | -2.140040 | -1.536550 | -2.061798 |
| H | 0 | -1.755671 | -2.484960 | 0.685616  |
| H | 0 | -2.766862 | -1.643882 | 1.850700  |
| H | 0 | -2.412806 | 2.774130  | 1.027582  |
| H | 0 | -3.403584 | 1.382726  | 0.680748  |
| H | 0 | -3.927618 | -0.420881 | 0.137660  |
| H | 0 | -3.811853 | -2.060073 | -0.444151 |

B3LYP/6-31G\* Energy + ZPE = -609.86831  
B3LYP/6-31G\* Free energy = -609.909451  
Number of imaginary frequencies = 1 (-419.29)

**Diels-Alder reaction of methanol vinylboronate (4)  
with cyclopentadiene (9)**

**Endo transition structure (TS-4+9-N)**

B3LYP/6-31G\* Geometry in Toluene

|   |   |          |           |           |
|---|---|----------|-----------|-----------|
| C | 0 | 2.079233 | 1.235512  | -0.506191 |
| C | 0 | 1.245841 | 0.571765  | -1.420159 |
| C | 0 | 1.241410 | -0.790292 | -1.127653 |
| C | 0 | 2.572221 | 0.301351  | 0.426661  |
| C | 0 | 2.422202 | -1.058169 | -0.230532 |
| H | 0 | 2.196344 | 2.312804  | -0.434767 |
| H | 0 | 0.622121 | 1.057337  | -2.164473 |
| H | 0 | 0.747642 | -1.555268 | -1.718343 |
| H | 0 | 3.396302 | 0.524058  | 1.100535  |
| H | 0 | 2.329934 | -1.909357 | 0.446554  |
| H | 0 | 3.308823 | -1.228249 | -0.866393 |
| C | 0 | 0.010281 | -0.677634 | 1.019497  |



|   |   |           |           |           |
|---|---|-----------|-----------|-----------|
| C | 0 | 0.986131  | 0.048664  | 1.718867  |
| B | 0 | -1.230299 | -0.012570 | 0.382586  |
| O | 0 | -2.286248 | -0.688770 | -0.193026 |
| O | 0 | -1.307950 | 1.361440  | 0.397987  |
| C | 0 | -2.394203 | 2.035699  | -0.218842 |
| C | 0 | -2.332569 | -2.103199 | -0.244340 |
| H | 0 | 0.054652  | -1.762758 | 1.103053  |
| H | 0 | 1.589007  | -0.459729 | 2.470379  |
| H | 0 | 0.789716  | 1.092230  | 1.945957  |
| H | 0 | -3.357156 | 1.710625  | 0.192237  |
| H | 0 | -2.268222 | 3.106796  | -0.032542 |
| H | 0 | -2.411284 | 1.862314  | -1.302183 |
| H | 0 | -2.342278 | -2.545239 | 0.760379  |
| H | 0 | -3.254592 | -2.389959 | -0.759541 |
| H | 0 | -1.479213 | -2.516285 | -0.797321 |

B3LYP/6-31G\* Energy + ZPE = -527.054205

B3LYP/6-31G\* Free energy = -527.094065

Number of imaginary frequencies = 1 (-454.37)

**Exo transition structure (TS-4+9-X)**

B3LYP/6-31G\* Geometry in Toluene

|   |   |           |           |           |
|---|---|-----------|-----------|-----------|
| C | 0 | -2.294653 | 1.178886  | -0.643881 |
| C | 0 | -3.056262 | 0.293616  | 0.136185  |
| C | 0 | -2.399504 | -0.951679 | 0.184577  |
| C | 0 | -1.189766 | 0.499954  | -1.156705 |
| C | 0 | -1.451432 | -0.973512 | -0.997868 |
| H | 0 | -2.482036 | 2.244146  | -0.747513 |
| H | 0 | -3.923658 | 0.568534  | 0.729796  |
| H | 0 | -2.871718 | -1.855892 | 0.561334  |
| H | 0 | -0.477009 | 0.911420  | -1.864730 |
| H | 0 | -0.566447 | -1.600877 | -0.888976 |
| H | 0 | -2.017011 | -1.322475 | -1.879801 |
| C | 0 | -0.889156 | -0.617153 | 1.580468  |
| C | 0 | -0.034052 | 0.337163  | 1.010761  |
| B | 0 | 1.316265  | -0.006677 | 0.340189  |
| O | 0 | 2.249324  | 0.922151  | -0.067279 |
| O | 0 | 1.632475  | -1.331848 | 0.128960  |
| C | 0 | 2.043003  | 2.315872  | 0.088826  |
| C | 0 | 2.855245  | -1.696813 | -0.497334 |
| H | 0 | -1.535874 | -0.336216 | 2.407608  |
| H | 0 | -0.557148 | -1.652860 | 1.612788  |
| H | 0 | -0.240244 | 1.376540  | 1.258381  |
| H | 0 | 2.889691  | 2.832563  | -0.373311 |
| H | 0 | 1.118510  | 2.644430  | -0.402299 |
| H | 0 | 1.995321  | 2.599964  | 1.147760  |
| H | 0 | 2.934443  | -1.271959 | -1.505124 |
| H | 0 | 3.719133  | -1.355800 | 0.085130  |
| H | 0 | 2.877793  | -2.788556 | -0.565610 |

B3LYP/6-31G\* Energy + ZPE = -527.055468

B3LYP/6-31G\* Free energy = -527.09534

Number of imaginary frequencies = 1 (-452.84)

**Diels-Alder reaction of pinacol vinylboronate (5) with  
trans-piperylene (11)**

**Ortho endo transition structure (TS-5+11-ON)**

B3LYP/6-31G\* Geometry in Toluene

|   |   |           |           |           |
|---|---|-----------|-----------|-----------|
| C | 0 | 3.320426  | -0.404668 | 1.112451  |
| C | 0 | 2.568069  | 0.780317  | 1.055885  |
| C | 0 | 2.267505  | 1.441917  | -0.118482 |
| C | 0 | 3.796402  | -1.046804 | -0.035173 |
| C | 0 | 1.390711  | 2.659641  | -0.182753 |
| H | 0 | 3.336692  | -0.947912 | 2.056641  |
| H | 0 | 2.084245  | 1.120067  | 1.972023  |
| H | 0 | 2.878371  | 1.259261  | -0.995963 |
| H | 0 | 4.354572  | -1.972692 | 0.092398  |
| H | 0 | 4.161170  | -0.441001 | -0.860830 |
| H | 0 | 1.970614  | 3.541573  | -0.490186 |
| H | 0 | 0.935408  | 2.877426  | 0.790059  |
| H | 0 | 0.580273  | 2.532276  | -0.909576 |
| C | 0 | 1.322591  | -0.616281 | -1.415507 |
| C | 0 | 2.178828  | -1.670413 | -1.058216 |
| B | 0 | -0.029795 | -0.381983 | -0.735887 |
| O | 0 | -0.489678 | -1.123225 | 0.339848  |
| O | 0 | -0.965196 | 0.547109  | -1.168022 |
| C | 0 | -1.734347 | -0.531753 | 0.793257  |
| C | 0 | -2.214863 | 0.270010  | -0.480710 |
| C | 0 | -3.069691 | -0.568330 | -1.442426 |
| C | 0 | -2.914526 | 1.596598  | -0.186032 |
| C | 0 | -2.668659 | -1.656306 | 1.240005  |
| C | 0 | -1.396206 | 0.368051  | 1.990052  |
| H | 0 | 1.538512  | -0.086957 | -2.343939 |
| H | 0 | 2.801265  | -2.114822 | -1.834469 |
| H | 0 | 1.810267  | -2.392417 | -0.333544 |
| H | 0 | -4.064285 | -0.772163 | -1.031551 |
| H | 0 | -3.191583 | -0.016007 | -2.379687 |
| H | 0 | -2.586732 | -1.523018 | -1.674296 |
| H | 0 | -3.839914 | 1.434238  | 0.378633  |
| H | 0 | -2.273882 | 2.273992  | 0.383376  |
| H | 0 | -3.176135 | 2.090621  | -1.127680 |
| H | 0 | -2.818108 | -2.395213 | 0.449344  |
| H | 0 | -2.235441 | -2.170239 | 2.104510  |
| H | 0 | -3.646457 | -1.259941 | 1.537519  |
| H | 0 | -0.892451 | -0.234148 | 2.752857  |
| H | 0 | -0.720252 | 1.177512  | 1.699572  |
| H | 0 | -2.295612 | 0.806533  | 2.435514  |

B3LYP/6-31G\* Energy + ZPE = -684.218757

B3LYP/6-31G\* Free energy = -684.262907

Number of imaginary frequencies = 1 (-470.99)

**Meta endo transition structure (TS-5+11-MN)**

B3LYP/6-31G\* Geometry in Toluene

|   |   |          |           |           |
|---|---|----------|-----------|-----------|
| C | 0 | 3.087305 | 1.168460  | 0.025362  |
| C | 0 | 2.056226 | 1.503723  | -0.864483 |
| C | 0 | 3.727670 | -0.072386 | 0.009253  |

|   |   |           |           |           |
|---|---|-----------|-----------|-----------|
| C | 0 | 1.609960  | 0.641630  | -1.848393 |
| C | 0 | 4.809617  | -0.395183 | 1.014442  |
| H | 0 | 3.242459  | 1.813263  | 0.891256  |
| H | 0 | 1.464900  | 2.390528  | -0.641739 |
| H | 0 | 3.856044  | -0.554848 | -0.957819 |
| H | 0 | 2.272104  | -0.087132 | -2.300135 |
| H | 0 | 0.723987  | 0.877216  | -2.431298 |
| H | 0 | 5.785642  | -0.027399 | 0.668791  |
| H | 0 | 4.910369  | -1.474737 | 1.172440  |
| H | 0 | 4.604411  | 0.070115  | 1.985185  |
| C | 0 | 1.110833  | -1.327277 | -0.548655 |
| C | 0 | 2.131611  | -1.420483 | 0.404604  |
| B | 0 | -0.266611 | -0.710943 | -0.250442 |
| O | 0 | -0.579512 | -0.065747 | 0.931273  |
| O | 0 | -1.349866 | -0.788697 | -1.109436 |
| C | 0 | -1.903346 | 0.513082  | 0.785103  |
| C | 0 | -2.527106 | -0.358927 | -0.374382 |
| C | 0 | -3.223916 | -1.631490 | 0.128790  |
| C | 0 | -3.450466 | 0.395315  | -1.330314 |
| C | 0 | -1.711645 | 1.987198  | 0.401491  |
| C | 0 | -2.622804 | 0.416756  | 2.130063  |
| H | 0 | 1.204326  | -1.953137 | -1.436563 |
| H | 0 | 2.828508  | -2.254047 | 0.347093  |
| H | 0 | 1.933394  | -1.072281 | 1.414790  |
| H | 0 | -3.445233 | -2.275937 | -0.727982 |
| H | 0 | -2.581083 | -2.192112 | 0.815003  |
| H | 0 | -4.165359 | -1.405405 | 0.640788  |
| H | 0 | -3.807699 | -0.285789 | -2.109910 |
| H | 0 | -4.324920 | 0.789032  | -0.799508 |
| H | 0 | -2.936666 | 1.226111  | -1.819830 |
| H | 0 | -2.667938 | 2.517086  | 0.336834  |
| H | 0 | -1.099117 | 2.475405  | 1.166186  |
| H | 0 | -1.195070 | 2.085400  | -0.558199 |
| H | 0 | -2.097657 | 1.028509  | 2.871139  |
| H | 0 | -3.651150 | 0.788458  | 2.052971  |
| H | 0 | -2.649806 | -0.610540 | 2.500744  |

B3LYP/6-31G\* Energy + ZPE = -684.217201  
B3LYP/6-31G\* Free energy = -684.261797  
Number of imaginary frequencies = 1 (-486.94)

#### **Ortho exo transition structure (TS-5+11-OX)**

B3LYP/6-31G\* Geometry in Toluene

|   |   |          |           |           |
|---|---|----------|-----------|-----------|
| C | 0 | 4.095245 | -0.391719 | 0.280910  |
| C | 0 | 3.559906 | 0.904629  | 0.192989  |
| C | 0 | 3.301473 | -1.510022 | 0.544675  |
| C | 0 | 2.237858 | 1.208283  | 0.451719  |
| C | 0 | 1.648116 | 2.570316  | 0.221488  |
| H | 0 | 5.103956 | -0.548877 | -0.100174 |
| H | 0 | 4.185130 | 1.683487  | -0.246402 |
| H | 0 | 2.473151 | -1.424288 | 1.242169  |
| H | 0 | 3.776723 | -2.489254 | 0.558581  |
| H | 0 | 1.666348 | 0.546531  | 1.095020  |
| H | 0 | 0.656671 | 2.498924  | -0.239834 |
| H | 0 | 2.287660 | 3.181029  | -0.425181 |

|   |   |           |           |           |
|---|---|-----------|-----------|-----------|
| H | 0 | 1.520466  | 3.108352  | 1.173001  |
| C | 0 | 1.290744  | -0.479078 | -1.239266 |
| C | 0 | 2.030839  | -1.656172 | -1.043318 |
| B | 0 | -0.121272 | -0.301314 | -0.670613 |
| O | 0 | -0.975632 | 0.733633  | -1.012287 |
| O | 0 | -0.687478 | -1.162445 | 0.254973  |
| C | 0 | -2.285893 | 0.423957  | -0.462715 |
| C | 0 | -1.935094 | -0.572546 | 0.710590  |
| C | 0 | -2.949470 | -1.693415 | 0.933242  |
| C | 0 | -1.637009 | 0.131983  | 2.041917  |
| C | 0 | -3.095059 | -0.229046 | -1.592511 |
| C | 0 | -2.954573 | 1.728442  | -0.031545 |
| H | 0 | 1.640935  | 0.217992  | -1.997187 |
| H | 0 | 1.514247  | -2.511507 | -0.611023 |
| H | 0 | 2.785613  | -1.929132 | -1.777219 |
| H | 0 | -3.925817 | -1.286024 | 1.220022  |
| H | 0 | -2.605065 | -2.345526 | 1.742817  |
| H | 0 | -3.076228 | -2.306542 | 0.038123  |
| H | 0 | -2.544650 | 0.546158  | 2.493778  |
| H | 0 | -0.914883 | 0.944578  | 1.912753  |
| H | 0 | -1.208027 | -0.595122 | 2.738822  |
| H | 0 | -2.630801 | -1.162527 | -1.926113 |
| H | 0 | -3.127947 | 0.455536  | -2.445978 |
| H | 0 | -4.123509 | -0.443344 | -1.283250 |
| H | 0 | -3.930088 | 1.533984  | 0.428927  |
| H | 0 | -3.115995 | 2.364228  | -0.908291 |
| H | 0 | -2.339140 | 2.284741  | 0.679161  |

B3LYP/6-31G\* Energy + ZPE = -684.219004  
B3LYP/6-31G\* Free energy = -684.263454  
Number of imaginary frequencies = 1 (-475.54)

#### **Meta exo transition structure (TS-5+11-MX)**

B3LYP/6-31G\* Geometry in Toluene

|   |   |           |           |           |
|---|---|-----------|-----------|-----------|
| C | 0 | -3.874484 | -0.765786 | 0.282755  |
| C | 0 | -2.996718 | -1.858227 | 0.359793  |
| C | 0 | -3.442257 | 0.554226  | 0.408628  |
| C | 0 | -1.644871 | -1.710876 | 0.611198  |
| C | 0 | -4.401409 | 1.711467  | 0.262456  |
| H | 0 | -4.879931 | -0.944018 | -0.101204 |
| H | 0 | -3.358854 | -2.826323 | 0.013733  |
| H | 0 | -2.604770 | 0.745926  | 1.075295  |
| H | 0 | -0.977422 | -2.564826 | 0.529946  |
| H | 0 | -1.274441 | -0.894874 | 1.220776  |
| H | 0 | -3.893993 | 2.615221  | -0.093900 |
| H | 0 | -4.863018 | 1.962253  | 1.227715  |
| H | 0 | -5.208470 | 1.477486  | -0.441100 |
| C | 0 | -1.103407 | -0.303386 | -1.225662 |
| C | 0 | -2.039434 | 0.737844  | -1.212255 |
| B | 0 | 0.320450  | -0.124594 | -0.667587 |
| O | 0 | 1.399105  | -0.909314 | -1.022741 |
| O | 0 | 0.655614  | 0.846648  | 0.258107  |
| C | 0 | 2.503413  | -0.573770 | -0.136592 |
| C | 0 | 2.105374  | 0.867798  | 0.368833  |
| C | 0 | 2.603353  | 1.992794  | -0.549430 |

|   |   |           |           |           |
|---|---|-----------|-----------|-----------|
| C | 0 | 2.475419  | 1.175472  | 1.818999  |
| C | 0 | 3.803968  | -0.647675 | -0.935404 |
| C | 0 | 2.515664  | -1.629431 | 0.977946  |
| H | 0 | -1.284173 | -1.129980 | -1.909433 |
| H | 0 | -1.722873 | 1.713385  | -0.850813 |
| H | 0 | -2.816809 | 0.770530  | -1.971262 |
| H | 0 | 2.340791  | 1.798980  | -1.594335 |
| H | 0 | 3.688840  | 2.121390  | -0.481929 |
| H | 0 | 2.126515  | 2.931546  | -0.250133 |
| H | 0 | 2.124044  | 2.178788  | 2.081562  |
| H | 0 | 3.562118  | 1.150807  | 1.960291  |
| H | 0 | 2.017442  | 0.466491  | 2.512723  |
| H | 0 | 3.769439  | -0.014104 | -1.824772 |
| H | 0 | 3.975003  | -1.678505 | -1.262901 |
| H | 0 | 4.658730  | -0.342373 | -0.320944 |
| H | 0 | 3.365620  | -1.493728 | 1.655192  |
| H | 0 | 2.593825  | -2.622489 | 0.524064  |
| H | 0 | 1.594712  | -1.599975 | 1.568842  |

B3LYP/6-31G\* Energy + ZPE = -684.217255  
B3LYP/6-31G\* Free energy = -684.262361  
Number of imaginary frequencies = 1 (-491.67)

#### Diels-Alder reaction of pinacol vinylboronate (5) with isoprene (12)

*Meta endo* transition structure (TS-5+12-MN)  
B3LYP/6-31G\* Geometry in Toluene

|   |   |           |           |           |
|---|---|-----------|-----------|-----------|
| C | 0 | 3.425167  | 0.430935  | 0.610231  |
| C | 0 | 2.534449  | 1.175006  | -0.193806 |
| C | 0 | 2.105912  | 0.668113  | -1.404710 |
| C | 0 | 3.852196  | -0.852122 | 0.279442  |
| C | 0 | 1.886080  | 2.408871  | 0.402017  |
| H | 0 | 3.587553  | 0.778490  | 1.631158  |
| H | 0 | 1.339573  | 1.179711  | -1.981052 |
| H | 0 | 2.695120  | -0.049052 | -1.960970 |
| H | 0 | 4.489739  | -1.383744 | 0.983186  |
| H | 0 | 4.044722  | -1.107459 | -0.758438 |
| H | 0 | 1.130865  | 2.128416  | 1.146838  |
| H | 0 | 1.396700  | 3.020330  | -0.362967 |
| H | 0 | 2.628880  | 3.037559  | 0.907090  |
| C | 0 | 1.218697  | -1.561274 | -0.700571 |
| C | 0 | 2.119390  | -2.013989 | 0.268881  |
| B | 0 | -0.098270 | -0.839972 | -0.373163 |
| O | 0 | -1.141031 | -0.722352 | -1.275818 |
| O | 0 | -0.419239 | -0.315784 | 0.868843  |
| C | 0 | -2.172699 | 0.096051  | -0.662924 |
| C | 0 | -1.847575 | -0.048444 | 0.874940  |
| C | 0 | -2.109104 | 1.200306  | 1.715807  |
| C | 0 | -2.522641 | -1.264944 | 1.525342  |
| C | 0 | -1.988359 | 1.524996  | -1.192553 |
| C | 0 | -3.536441 | -0.445023 | -1.091828 |
| H | 0 | 1.343909  | -1.947367 | -1.712864 |
| H | 0 | 2.710702  | -2.904658 | 0.062827  |

|   |   |           |           |           |
|---|---|-----------|-----------|-----------|
| H | 0 | 1.858610  | -1.886912 | 1.316118  |
| H | 0 | -1.816085 | 1.011090  | 2.753852  |
| H | 0 | -1.538542 | 2.059510  | 1.355738  |
| H | 0 | -3.173782 | 1.461205  | 1.708129  |
| H | 0 | -2.347080 | -2.175338 | 0.943315  |
| H | 0 | -2.096711 | -1.414817 | 2.522566  |
| H | 0 | -3.603523 | -1.122928 | 1.630787  |
| H | 0 | -1.018950 | 1.936622  | -0.896011 |
| H | 0 | -2.029485 | 1.506246  | -2.286431 |
| H | 0 | -2.775054 | 2.195728  | -0.830882 |
| H | 0 | -3.654178 | -0.326429 | -2.174122 |
| H | 0 | -3.641560 | -1.506627 | -0.856434 |
| H | 0 | -4.348337 | 0.104482  | -0.601424 |

B3LYP/6-31G\* Energy + ZPE = -684.217234  
B3LYP/6-31G\* Free energy = -684.261401  
Number of imaginary frequencies = 1 (-486.70)

*Para endo* transition structure (TS-5+12-PN)  
B3LYP/6-31G\* Geometry in Toluene

|   |   |           |           |           |
|---|---|-----------|-----------|-----------|
| C | 0 | -3.173744 | 0.491686  | 0.472760  |
| C | 0 | -2.263588 | -0.042000 | 1.412365  |
| C | 0 | -1.828709 | -1.347138 | 1.391066  |
| C | 0 | -3.684489 | -0.330578 | -0.533182 |
| C | 0 | -3.313883 | 1.994458  | 0.377474  |
| H | 0 | -1.742947 | 0.664060  | 2.059816  |
| H | 0 | -1.030892 | -1.674688 | 2.051706  |
| H | 0 | -2.418398 | -2.142101 | 0.953169  |
| H | 0 | -4.363662 | 0.102437  | -1.265523 |
| H | 0 | -3.887777 | -1.374715 | -0.316873 |
| H | 0 | -4.211412 | 2.288541  | -0.175948 |
| H | 0 | -2.445235 | 2.436055  | -0.132033 |
| H | 0 | -3.365185 | 2.450167  | 1.373333  |
| C | 0 | -1.054489 | -1.488516 | -0.996765 |
| C | 0 | -2.055147 | -0.828269 | -1.720061 |
| B | 0 | 0.228661  | -0.782927 | -0.536305 |
| O | 0 | 1.366350  | -1.439819 | -0.098925 |
| O | 0 | 0.399727  | 0.591209  | -0.575563 |
| C | 0 | 2.297753  | -0.436043 | 0.386031  |
| C | 0 | 1.807220  | 0.867880  | -0.357907 |
| C | 0 | 1.929639  | 2.161428  | 0.446679  |
| C | 0 | 2.444351  | 1.051039  | -1.742905 |
| C | 0 | 2.127132  | -0.365786 | 1.910155  |
| C | 0 | 3.717054  | -0.885631 | 0.041674  |
| H | 0 | -1.101457 | -2.576437 | -0.948702 |
| H | 0 | -2.687494 | -1.406969 | -2.391747 |
| H | 0 | -1.854044 | 0.183429  | -2.063185 |
| H | 0 | 1.531399  | 2.996283  | -0.139584 |
| H | 0 | 1.367968  | 2.110019  | 1.382343  |
| H | 0 | 2.977856  | 2.381875  | 0.679733  |
| H | 0 | 2.363728  | 0.137074  | -2.339987 |
| H | 0 | 1.914503  | 1.848441  | -2.273728 |
| H | 0 | 3.501505  | 1.328539  | -1.671721 |
| H | 0 | 2.294438  | -1.362167 | 2.331867  |
| H | 0 | 2.842802  | 0.325638  | 2.367655  |

|     |          |           |           |
|-----|----------|-----------|-----------|
| H 0 | 1.115779 | -0.047488 | 2.181538  |
| H 0 | 4.451627 | -0.128348 | 0.339212  |
| H 0 | 3.949925 | -1.811040 | 0.579105  |
| H 0 | 3.830441 | -1.080266 | -1.027331 |

B3LYP/6-31G\* Energy + ZPE = -684.217877  
B3LYP/6-31G\* Free energy = -684.262794  
Number of imaginary frequencies = 1 (-479.70)

**Meta exo transition structure (TS-5+12-MX)**

B3LYP/6-31G\* Geometry in Toluene

|     |           |           |           |
|-----|-----------|-----------|-----------|
| C 0 | -3.873993 | -0.603272 | 0.419433  |
| C 0 | -3.366657 | 0.714406  | 0.391064  |
| C 0 | -2.021900 | 0.939760  | 0.618265  |
| C 0 | -3.056169 | -1.716506 | 0.581370  |
| C 0 | -4.265793 | 1.837718  | -0.086625 |
| H 0 | -4.892545 | -0.759324 | 0.061873  |
| H 0 | -1.599897 | 1.931892  | 0.479393  |
| H 0 | -1.432048 | 0.267540  | 1.228390  |
| H 0 | -3.501318 | -2.707341 | 0.516510  |
| H 0 | -2.192747 | -1.666760 | 1.237006  |
| H 0 | -3.695329 | 2.751010  | -0.283176 |
| H 0 | -5.023631 | 2.081179  | 0.669880  |
| H 0 | -4.804769 | 1.569976  | -1.003870 |
| C 0 | -1.116086 | -0.437904 | -1.192974 |
| C 0 | -1.751897 | -1.680053 | -1.078833 |
| B 0 | 0.303078  | -0.193651 | -0.652625 |
| O 0 | 0.887067  | -0.982633 | 0.322707  |
| O 0 | 1.135860  | 0.823102  | -1.075939 |
| C 0 | 2.292263  | -0.617651 | 0.400104  |
| C 0 | 2.293576  | 0.844590  | -0.194840 |
| C 0 | 2.031291  | 1.930462  | 0.858264  |
| C 0 | 3.525186  | 1.207954  | -1.023014 |
| C 0 | 3.060985  | -1.626067 | -0.465390 |
| C 0 | 2.742419  | -0.729276 | 1.855721  |
| H 0 | -1.528112 | 0.274913  | -1.903993 |
| H 0 | -1.178880 | -2.519319 | -0.690727 |
| H 0 | -2.515216 | -1.956348 | -1.801495 |
| H 0 | 1.843841  | 2.880838  | 0.348408  |
| H 0 | 1.152505  | 1.693545  | 1.466303  |
| H 0 | 2.889098  | 2.062384  | 1.526260  |
| H 0 | 3.651826  | 0.534736  | -1.874006 |
| H 0 | 3.419264  | 2.226268  | -1.411483 |
| H 0 | 4.433440  | 1.172472  | -0.410424 |
| H 0 | 2.748292  | -1.571359 | -1.513060 |
| H 0 | 4.142598  | -1.461328 | -0.416472 |
| H 0 | 2.850502  | -2.637219 | -0.102699 |
| H 0 | 2.119448  | -0.124913 | 2.519140  |
| H 0 | 2.670250  | -1.771944 | 2.182395  |
| H 0 | 3.785267  | -0.411364 | 1.969560  |

B3LYP/6-31G\* Energy + ZPE = -684.216946  
B3LYP/6-31G\* Free energy = -684.262921

Number of imaginary frequencies = 1 (-494.85)

**Para exo transition structure (TS-5+12-PX)**

B3LYP/6-31G\* Geometry in Toluene

|     |           |           |           |
|-----|-----------|-----------|-----------|
| C 0 | -1.063188 | -0.177784 | -1.184689 |
| C 0 | -1.864528 | -1.308777 | -0.995740 |
| B 0 | 0.374877  | -0.091341 | -0.651490 |
| O 0 | 0.854505  | -0.893176 | 0.370294  |
| O 0 | 1.333001  | 0.782997  | -1.127026 |
| C 0 | 2.295033  | -0.710004 | 0.434054  |
| C 0 | 2.486107  | 0.702270  | -0.244808 |
| C 0 | 2.375139  | 1.873145  | 0.741950  |
| C 0 | 3.751841  | 0.851850  | -1.087879 |
| C 0 | 2.730087  | -0.793933 | 1.896460  |
| C 0 | 2.923966  | -1.859480 | -0.366215 |
| H 0 | -1.388257 | 0.552394  | -1.922599 |
| H 0 | -1.409334 | -2.195380 | -0.559612 |
| H 0 | -2.662427 | -1.520156 | -1.704178 |
| H 0 | 1.473408  | 1.793510  | 1.357289  |
| H 0 | 3.244302  | 1.926551  | 1.406156  |
| H 0 | 2.316526  | 2.808619  | 0.176469  |
| H 0 | 4.649721  | 0.737646  | -0.469578 |
| H 0 | 3.788867  | 0.116950  | -1.895378 |
| H 0 | 3.776863  | 1.849523  | -1.538545 |
| H 0 | 2.191186  | -0.077238 | 2.520554  |
| H 0 | 2.525061  | -1.797988 | 2.282291  |
| H 0 | 3.805326  | -0.606377 | 1.997357  |
| H 0 | 4.017955  | -1.835956 | -0.319897 |
| H 0 | 2.582476  | -2.811171 | 0.053285  |
| H 0 | 2.619910  | -1.825625 | -1.417293 |
| C 0 | -3.858878 | 0.087241  | 0.407464  |
| C 0 | -3.153260 | 1.312191  | 0.369667  |
| C 0 | -1.800247 | 1.417686  | 0.595100  |
| C 0 | -3.162479 | -1.095579 | 0.649815  |
| C 0 | -5.277431 | 0.039448  | -0.117266 |
| H 0 | -3.676651 | 2.179446  | -0.035385 |
| H 0 | -1.286996 | 2.359680  | 0.421819  |
| H 0 | -1.265435 | 0.702555  | 1.207649  |
| H 0 | -3.705713 | -2.039022 | 0.634336  |
| H 0 | -2.309561 | -1.092573 | 1.319863  |
| H 0 | -5.771103 | 1.012010  | -0.016090 |
| H 0 | -5.883285 | -0.704890 | 0.410802  |
| H 0 | -5.300256 | -0.224016 | -1.185474 |

B3LYP/6-31G\* Energy + ZPE = -684.217578  
B3LYP/6-31G\* Free energy = -684.263382  
Number of imaginary frequencies = 1 (-474.31)
